# Supplementary material for: Interdisciplinary, interinstitutional and international collaboration of family medicine researchers in Taiwan
Source: PeerJ. 2015 Oct 8;3:e1321. doi: 10.7717/peerj.1321 (PMC4614802; doi:10.7717/peerj.1321)
Supplement: Supplemental Information 1 [file peerj-03-1321-s001.xls]

## Sheet: 2010-2014
Title	Publication year	Accessing number	Category	Journal	ISSN	I.F.	FM in 1st author (yes 1; no 0)	FM in corresponding (yes 1; no 0)	FM author institution	Discipline of 1st author	1st author institution	International (yes 1; no 0)	Which countries	Continent	Interinstitutional (yes 1; no 0)	Interdisciplinary (yes 1; no 0)	Publ Hlth	Environm & Occupat Hlth	Bioinformatics	Hosp & Hlth Care	Geriatric	Palliat Care	Psychiat	CV	CVS	AIR	Neuro	Chest	Nephrology	Infection	GI	Hema	META	Radiol	Nuclear medicine	Internal Med	Emergency	Crit Care	General sugery	Plasty surgery	Colonrectal surgery	Chest surgery	Genitourinary	Neuro surgery	Pediatric surgery	Obstet & Gyneco	Ortho	Radiat Oncol	Anesthesia
COMPARISON OF CHART-BASED AND WEB-BASED ESTIMATIONS OF 10-YEAR PROBABILITY OF FRACTURES AMONG CUSTOMERS SCREENED AT PHARMACY CHAIN STORES IN TAIWAN	2014	331694800070	Endocrinology & Metabolism	Osteoporosis International	0937-941X	4.165	0	0	Changhua Christian Hospital	Geriatric	Natl Taiwan Univ	0	0		1	1					1																										1
Geographic Disparity in Chronic Obstructive Pulmonary Disease (COPD) Mortality Rates among the Taiwan Population	2014	339563400103	Multidisciplinary Sciences	Plos One	1932-6203	3.534	0	0	Fangliao Gen Hosp	Obstet & Gynecol	中研院Acad Sinica	0	0		1	1	1				0																										0
Elevated Serum Triglyceride and Retinol-Binding Protein 4 Levels Associated with Fructose-Sweetened Beverages in Adolescents	2014	330507300007	Multidisciplinary Sciences	PLoS One	1932-6203	3.534	0	0	Kaohsiung Medical University & Hospital	Taipei Vet Gen Hosp	Kaohsiung Med Univ Hosp	1	USA	North America	1	1	1	1			0																		1							1	0
Consumption of Sugar-Sweetened Beverages Is Associated with Components of the Metabolic Syndrome in Adolescents	2014	337160100021	Nutrition & Dietetics	Nutrients	2072-6643	3.14	0	0	Kaohsiung Medical University & Hospital	Obstet & Gynecol	Kaohsiung Med Univ Hosp	1	USA	North America	1	1					1																		1							1	0
Patient- and Clinic Visit-Related Factors Associated with Potentially Inappropriate Medication Use among Older Home Healthcare Service Recipients	2014	336909100057	Multidisciplinary Sciences	Plos One	1932-6203	3.534	0	1	National Taiwan University & Hospital	Internal Med	Chang Gung Mem Hosp	0	0		1	1					1		1													1										1
A case of recurrent, bilateral ovarian mature teratoma in a young woman	2014	334949500001	Public, Environmental & Occupational Health	BMC Womens Health	1472-6874	1.657	1	0	Armed Forces General Hospital	FM	Taoyuan Armed Forces Gen Hosp	0	0		0	1
			Obstetrics & Gynecology
Continuation of statin therapy and a decreased risk of atrial fibrillation/flutter in patients with and without chronic kidney disease	2014	329209100034	Peripheral Vascular Disease	Atherosclerosis	0021-9150	3.971	0	0	Cathay General Hospital	Internal Med	Natl Taiwan Univ	0	0		1	1	1							1												1
Response to the letter entitled "Comment on theimpacts of sarcopenia and obesity on physicalperformance in the elderly"	2014	345629600016	Endocrinology & Metabolism	Obesity Research & Clinical Practice	1871-403X	0.697	0	1	National Taiwan University & Hospital	Geriatric	Natl Taiwan Univ	0	0		0	1	1				1
			Nutrition & Dietetics
Lymphopenia and poor performance status as major predictors for infections among residents in long-term care facilities (LTCFs): A prospective cohort study	2014	332409200022	Geriatrics & Gerontology	Archives of Gerontology and Geriatrics	0167-4943	1.525	1	0	Minist Hlth & Welf, Feng Yuan Hosp	FM	Feng Yuan Hosp	0	0		1	1	1				1
Serum hepassocin contributes to insulin resistance in type 2 diabetes	2014	344386101234	Endocrinology & Metabolism	Diabetologia	0012-186X	6.88	1	0	National Cheng Kung University & Hospital	FM	Chang Gung Mem Hosp	0	0		0	1																				1
The Ecology of Gynecological Care for Women	2014	341101700008	Environmental Sciences	International Journal of Environmental Research and Public Health	1660-4601	1.993	0	0	Taipei Veterans General Hospital	Obstet & Gynecol	Taipei Vet Gen Hosp	0	0		1	1																														1
Management trajectories in the type 2 diabetes Integrated Delivery System project in Taiwan: accounting for behavioral therapy, nutrition education and therapeutics	2014	347143600011	Nutrition & Dietetics	Asia Pacific Journal of Clinical Nutrition	0964-7058	1.36	0	0	National Cheng Kung University & Hospital	Publ Hlth	Natl Hlth Res Inst	1	Australia	Oceania	1	1	1																			1
Comparative and Clinical Effectiveness Studies Based on Taiwan National Health Insurance Research Database	2014	342763600628	Pharmacology & Pharmacy	Pharmacoepidemiology and Drug Safety	1053-8569	3.172	0	1	Taipei Veterans General Hospital	FM	Natl Hlth Res Inst	0	0		1	1	1
Risks of Musculoskeletal Disorders among Betel Quid Preparers in Taiwan	2014	332217900009	Public, Environmental & Occupational Health	American Journal of Industrial Medicine	0271-3586	1.59	0	0	Chi Mei Medical Center	Rehabilitation	Chang Gung Mem Hosp	0	0		1	1	1	1
Association between C-reactive protein, corrected QT interval and presence of QT prolongation in hypertensive patients	2014	335910500007	Medicine, Research & Experimental	Kaohsiung Journal of Medical Sciences	1607-551X	0.805	1	0	Chang Gung Memorial Hospital	FM	Chang Gung Mem Hosp	0	0		1	1								1												1	1
Use of a Bayesian Approach to Design and Evaluation of NCE2	2014	342763600798	Pharmacology & Pharmacy	Pharmacoepidemiology and Drug Safety	1053-8569	3.172	0	0	Cathay General Hospital	Minist Hlth & Welf食品藥物管理署	Food & Drug Adm衛福部	0	0		1	1	1
The association of asthma and atrial fibrillation - A nationwide population-based nested case-control study	2014	341422200040	Cardiac & Cardiovascular Systems	International Journal of Cardiology	0167-5273	6.175	0	0	Taipei Veterans General Hospital	CV	Taipei Vet Gen Hosp	0	0		1	1				1				1
Road traffic noise frequency and prevalent hypertension in Taichung, Taiwan: A cross-sectional study	2014	336677500001	Environmental Sciences	Environmental Health	1476-069X	2.713	0	0	China Medical University Hospital	Publ Hlth	China Med Univ	1	Netherlands	Europe	1	1	1
			Public, Environmental & Occupational Health
Tuberculosis infection in primary Sjogren's syndrome: a nationwide population-based study	2014	332485400013	Rheumatology	Clinical Rheumatology	0770-3198	1.774	0	0	Taipei Veterans General Hospital	AIR	Taipei Vet Gen Hosp	0	0		1	1	1									1			1
Low socioeconomic status may increase the risk of central obesity in incoming university students in Taiwan	2014	335663500002	Endocrinology & Metabolism	Obesity Research & Clinical Practice	1871-403X	0.697	1	1	Min Sheng General Hospital	FM	Min Sheng Gen Hosp 敏盛	0	0		1	1
			Nutrition & Dietetics
Serum homocysteine level is positively associated with chronic kidney disease in a Taiwan Chinese population	2014	336024500010	Urology & Nephrology	Journal of Nephrology	1121-8428	1.996	1	1	China Medical University Hospital	FM	China Med Univ Hosp	1	USA	North America	1	1				1
Acute myocardial infarction in patients with atrial fibrillation with a CHA(2)DS(2)-VASc score of 0 or 1: A nationwide cohort study	2014	344480000016	Cardiac & Cardiovascular Systems	Heart Rhythm	1547-5271	4.918	0	0	Taipei Veterans General Hospital	CV	Taipei Vet Gen Hosp	1	England	Europe	1	1	1							1						1		1
Does Digoxin Increase the Risk of Ischemic Stroke and Mortality in Atrial Fibrillation? A Nationwide Population-Based Cohort Study	2014	343330000016	Cardiac & Cardiovascular Systems	Canadian Journal of Cardiology	0828-282X	3.94	0	0	Taipei Veterans General Hospital	CV	Taipei Vet Gen Hosp	0	0		0	1	1							1						1		1				1
Incidence and Risk of Atrial Fibrillation in Sleep-Disordered Breathing Without Coexistent Systemic Disease - Nationwide Longitudinal Cohort Study	2014	341294400016	Cardiac & Cardiovascular Systems	Circulation Journal	1346-9843	3.685	0	0	Taipei Veterans General Hospital	CV	Taipei Vet Gen Hosp	0	0		1	1								1						1		1
Hyperuricemia and the risk of ischemic stroke in patients with atrial fibrillation - Could it refine clinical risk stratification in AF?	2014	329124100024	Cardiac & Cardiovascular Systems	International Journal of Cardiology	0167-5273	6.175	0	0	Taipei Veterans General Hospital	CV	Taipei Vet Gen Hosp	0	0		1	1	1													1		1
Long-term Prognosis of Patients Older Than Ninety Years After Permanent Pacemaker Implantation: Does the Procedure Save the Patients?	2014	343330000017	Cardiac & Cardiovascular Systems	Canadian Journal of Cardiology	0828-282X	3.94	0	0	Taipei Veterans General Hospital	CV	Taipei Vet Gen Hosp	0	0		1	1	1							1								1
Using the CHA(2)DS(2)-VASc Score for Refining Stroke Risk Stratification in 'Low-Risk' Asian Patients With Atrial Fibrillation	2014	343489900003	Cardiac & Cardiovascular Systems	Journal of the American College of Cardiology	0735-1097	15.343	0	0	Taipei Veterans General Hospital	CV	Taipei Vet Gen Hosp	1	England	Europe	1	1	1							1								1
Incidence and prediction of ischemic stroke among atrial fibrillation patients with end-stage renal disease requiring dialysis	2014	343112200020	Cardiac & Cardiovascular Systems	Heart Rhythm	1547-5271	4.918	0	0	Taipei Veterans General Hospital	CV	Taipei Vet Gen Hosp	1	England	Europe	1	1	1							1								1
Do Not Resuscitate'' Orders Among Deceased Patients Who Received Acute Neurological Care An Observation Analysis	2014	346985700031	Medicine, General & Internal	Medicine	0025-7974	4.867	0	0	Cardinal Tien Hospital	Neuro	Cardinal Tien Hosp耕莘	0	0		0	1											1
Use of white blood cell counts to predict metabolic syndrome in the elderly: a 4 year longitudinal study	2014	345424700007	Endocrinology & Metabolism	Aging Male	1368-5538	1.85	0	0	Cardinal Tien Hospital	Biotechnol	Cardinal Tien Hosp耕莘	0	0		1	1																	1
			Urology & Nephrology
Microfluidic chip for plasma separation from undiluted human whole blood samples using low voltage contactless dielectrophoresis and capillary force	2014	336738900004	Multidisciplinary	Lab on a Chip	1473-0197	5.748	1	0	St Martin de Porres Hosp	FM	St Martin de Porres Hosp	0	0		1	1
Alendronate and risk of lower limb ischemic vascular events: a population-based cohort study	2014	330981100031	Endocrinology & Metabolism	Osteoporosis International	0937-941X	4.165	0	0	Taipei Veterans General Hospital	Radio	Taipei Vet Gen Hosp	0	0		1	1				1					1									1													1
									Minist Hlth & Welf, Taipei Hosp
Impact on outcomes by measuring tortuosity with reporting standards for thoracic endovascular aortic repair	2014	343316600020	Surgery	Journal of Vascular Surgery	0741-5214	2.98	0	0	Minist Hlth & Welf, Taipei Hosp	Radio	Taipei Vet Gen Hosp	0	0		1	1				1					1									1					1
			Peripheral Vascular Disease
Possible association between phantom vibration syndrome and occupational burnout	2014	345916700001	Clinical Neurology	Neuropsychiatric Disease and Treatment	1178-2021	2.154	0	0	Min Sheng General Hospital	Educ	Natl Taiwan Univ	0	0		1	1							1
			Psychiatry
Chinese herbal prescriptions for osteoarthritis in Taiwan: analysis of national health insurance dataset	2014	332560000002	Integrative & Complementary Medicine	Bmc Complementary and Alternative Medicine	1472-6882	1.877	0	1	Taipei Veterans General Hospital	中醫	Taipei Vet Gen Hosp	0	0		1	1
Active smoking, environmental tobacco smoke and bronchitic symptoms among adolescents in Taiwan: A prospective cohort study	2014	339235700021	Public, Environmental & Occupational Health; Medicine	Preventive Medicine	0091-7435	2.932	0	0	Taipei City Hospital	Publ Hlth	Natl Taiwan Univ	0	0		1	1	1	1
			General & Internal
Clinical predictors of incident gallstone disease in a Chinese population in Taipei, Taiwan	2014	335264500001	Gastroenterology & Hepatology	Bmc Gastroenterology	1471-230X	2.113	1	0	Chang Gung Memorial Hospital	FM	Chang Gung Mem Hosp	0	0		1	1	1
Prevalence and Associated Factors of Frailty Among Elderly People in Taiwan	2014	343793000003	Geriatrics & Gerontology	International Journal of Gerontology	1873-9598	0.473	0	0	National Taiwan University & Hospital	Hlth Business Adm	Hungkuang Univ	0	0		1	1				1
Prospective associations between different categories of physical activity and insomnia in older adults	2014	342725900001	Multidisciplinary	International Journal of Sport Psychology	0047-0767	0.453	0	0	Taipei City Hospital	Rehabilitation	Natl Taiwan Univ	1	England	Europe	1	1
			Psychiatry
A predisposition for allergies predicts subsequent hypertension, dyslipidemia, and diabetes mellitus among patients with schizophrenia or bipolar disorder: A nationwide longitudinal study	2014	343107400028	Psychiatry	Schizophrenia Research	0920-9964	4.426	0	0	Taipei Veterans General Hospital	Psychi	Taipei Vet Gen Hosp	0	0		1	1							1
Risk of Dementia Among Patients With Asthma: A Nationwide Longitudinal Study	2014	343128500012	Geriatrics & Gerontology	Journal of the American Medical Directors Association	1525-8610	4.781	0	0	Taipei Veterans General Hospital	Psychi	Taipei Vet Gen Hosp	0	0		1	1							1
Is neonatal jaundice associated with autism spectrum disorder, attention deficit hyperactivity disorder, and other psychological development? A nationwide prospective study	2014	336111200004	Psychiatry	Research in Autism Spectrum Disorders	1750-9467	2.378	0	0	Taipei Veterans General Hospital	Psychi	Taipei Vet Gen Hosp	0	0		0	1							1
			Education, Special
Higher risk of mood disorders among adolescents with ADHD and asthma: A nationwide prospective study	2014	330215700032	Clinical Neurology	Journal of Affective Disorders	0165-0327	3.705	0	0	Taipei Veterans General Hospital	Psychi	Taipei Vet Gen Hosp	0	0		0	1							1
			Psychiatry
Higher risk of developing major depression and bipolar disorder in later life among adolescents with asthma: A nationwide prospective study	2014	329772800004	Psychiatry	Journal of Psychiatric Research	0022-3956	4.092	0	0	Taipei Veterans General Hospital	Psychi	Taipei Vet Gen Hosp	0	0		0	1							1
Is atopy in early childhood a risk factor for ADHD and ASD? A longitudinal study	2014	342886900010	Psychiatry	Journal of Psychosomatic Research	0022-3999	2.839	0	0	Taipei Veterans General Hospital	Psychi	Taipei Vet Gen Hosp	0	0		1	1							1
Risk of Depressive Disorder Among Patients With Herpes Zoster: A Nationwide Population-Based Prospective Study	2014	336507600006	Psychiatry	Psychosomatic Medicine	0033-3174	4.085	0	0	Taipei Veterans General Hospital	Psychi	Taipei Vet Gen Hosp	0	0		1	1							1				1
			Multidisciplinary
Risk of epilepsy among patients with atopic dermatitis: A nationwide longitudinal study	2014	342236400026	Clinical Neurology	Epilepsia	0013-9580	4.584	0	0	Taipei Veterans General Hospital	Psychi	Taipei Vet Gen Hosp	0	0		0	1							1				1
Non-pharmacological treatment reducing not only behavioral symptoms, but also psychotic symptoms of older adults with dementia: A prospective cohort study in Taiwan	2014	333753700026	Geriatrics & Gerontology	Geriatrics & Gerontology International	1444-1586	1.575	1	0	Taipei Veterans General Hospital	FM	Taipei Vet Gen Hosp	0	0		0	1					1
			Gerontology
The Epidemiology of Imported Malaria in Taiwan between 2002-2013: The Importance of Sensitive Surveillance and Implications for Pre-Travel Medical Advice	2014	338662600007	Environmental Sciences	International Journal of Environmental Research and Public Health	1660-4601	1.993	1	0	Da Chien Gen Hosp	FM	Da Chien Gen Hosp	0	0		1	1	1	1
Epidemiology of burns in Taiwan: A nationwide report including inpatients and outpatients	2014	343843600020	Critical Care Medicine	Burns	0305-4179	1.836	0	0	Taipei Veterans General Hospital	PS	Taipei Vet Gen Hosp	0	0		1	1																							1
			Dermatology
Maternal diabetes or hypertension and lifestyle factors may be associated with metabolic syndrome: A population-based study in Taiwan	2014	329977700005	Medicine	Kaohsiung Journal of Medical Sciences	1607-551X	0.805	1	1	Kaohsiung Medical University & Hospital	FM	Kaohsiung Med Univ Hosp	0	0		1	1		1
			Research & Experimental
Synergistic anabolic actions of hyaluronic acid and platelet-rich plasma on cartilage regeneration in osteoarthritis therapy	2014	342890200005	Engineering	Biomaterials	0142-9612	8.312	0	0	Taipei Medical University & Hospital	Stem Cell Res Ctr	Taipei Med Univ	1	USA	North America	1	1																							1								1
			Biomedical
Renin-angiotensin-aldosterone system related gene polymorphisms and urinary total arsenic is related to chronic kidney disease	2014	340695500002	Pharmacology & Pharmacy	Toxicology and Applied Pharmacology	0041-008X	3.63	0	0	Taipei Medical University & Hospital	Publ Hlth	Taipei Med Univ	0	0		1	1	1												1							1			1
			Toxicology
Pulmonary Embolism in Chronic Obstructive Pulmonary Disease: A Population-Based Cohort Study	2014	339797500010	Respiratory System	Copd-Journal of Chronic Obstructive Pulmonary Disease	1541-2555	2.62	0	1	Chia Yi Christian Hospital	Chest	Mackay Mem Hosp	0	0		1	1	1											1								1
Relationship between Lung Function and Metabolic Syndrome	2014	343941200030	Multidisciplinary Sciences	Plos One	1932-6203	3.534	1	1	Tri-Service General Hospital	FM	Tri Serv Gen Hosp	0	0		1	1		1
Risk factors associated with adverse drug events among older adults in emergency department	2014	329853900019	Medicine	European Journal of Internal Medicine	0953-6205	2.3	0	0	Taipei Veterans General Hospital	Emergency Med	Taipei Vet Gen Hosp	0	0		1	1		1																			1
			General & Internal
Pathway from Central Obesity to Childhood Asthma Physical Fitness and Sedentary Time Are Leading Factors	2014	336017200011	Critical Care Medicine	American Journal of Respiratory and Critical Care Medicine	1073-449X	11.986	1	0	Taipei City Hospital	FM	市立中興醫院	0	0		1	1	1	1
			Respiratory System
The effect of chromium on inflammatory markers, 1st and 2nd phase insulin secretion in type 2 diabetes	2014	331079500011	Nutrition & Dietetics	European Journal of Nutrition	1436-6207	3.84	0	0	Fu Jen Catholic Univ	Pathology	Cardinal Tien Hosp耕莘	0	0		1	1																	1
Low Serum Selenium Level Is Associated With Low Muscle Mass in the Community-Dwelling Elderly	2014	344482700006	Geriatrics & Gerontology	Journal of the American Medical Directors Association	1525-8610	4.781	1	1	National Taiwan University & Hospital	FM	Natl Taiwan Univ	0	0		1	1
Deep brain stimulation for Parkinson's disease using frameless technology	2014	336986900019	Clinical Neurology	British Journal of Neurosurgery	0268-8697	0.947	1	1	Minist Hlth & Welf, Taichung Hospital	FM	Minist Hlth & Welf, Taichung Hosp	0	0		1	1											1																	1
			Surgery
Inhibitory Effects of Scutellarein on Proliferation of Human Lung Cancer A549 Cells through ERK and NF kappa B Mediated by the EGFR Pathway	2014	341342200002	Physiology	Chinese Journal of Physiology	0304-4920	1.275	0	0	Minist Hlth & Welf, Taichung Hospital	美容系	Chien Kuo Technol Univ	0	0		1	1																												1
Squamous Cell Papilloma of the Stomach	2014	332495300011	Medicine, General & Internal	Kuwait Medical Journal	0023-5776	0.098	1	0	Buddhist Tzu Chi General Hospital	FM	Taichung Tzu Chi Gen Hosp	0	0		1	1																				1
HBsAg expression of liver correlates with histological activities and viral replication in chronic hepatitis B	2014	347018000007	Gastroenterology & Hepatology	Annals of Hepatology	1665-2681	2.193	1	0	National Cheng Kung University & Hospital	FM	Natl Cheng Kung Univ Hosp	0	0		0	1																				1
Social relationship and health among students with low social desirability	2014	334768900005	Psychiatry	Asia-Pacific Psychiatry	1758-5864	0.422	0	1	National Cheng Kung University & Hospital	Psychi	Natl Cheng Kung Univ	0	0		0	1	1						1
Metformin-inclusive Therapy Reduces the Risk of Stroke in Patients with Diabetes: A 4-Year Follow-up Study	2014	330582500006	Neurosciences	Journal of Stroke & Cerebrovascular Diseases	1052-3057	1.993	0	0	Taipei Veterans General Hospital	Rehabilitation	Taichung Vet Gen Hosp	0	0		1	1				1
			Peripheral Vascular Disease
Surgical-derived oral adipose tissue provides early stage adult stern cells	2014	335364900002	Dentistry, Oral Surgery & Medicine	Journal of Dental Sciences	1991-7902	0.485	0	0	Armed Forces General Hospital	Dent	Taipei Vet Gen Hosp	0	0		1	1
Association between metabolic factors and chronic hepatitis B virus infection	2014	338519800011	Gastroenterology & Hepatology	World Journal of Gastroenterology	1007-9327	2.433	1	1	National Taiwan University & Hospital	FM	Natl Taiwan Univ	0	0		1	1
Opposite Association Between Diabetes, Dyslipidemia, and Hepatocellular Carcinoma Mortality in the Middle-Aged and Elderly	2014	337567100022	Hepatology	Gastroenterology & Hepatology	0270-9139	11.19	1	1	National Taiwan University & Hospital	FM	Natl Taiwan Univ	0	0		1	1																				1
Primary Sjogren's syndrome and risk of ischemic stroke: a nationwide study	2014	338324000008	Rheumatology	Clinical Rheumatology	0770-3198	1.774	0	0	Chi Mei Medical Center	CV	Da Chien Gen Hosp大千	0	0		1	1				1				1								1				1
XRCC1 Arg194Trp and Arg399Gln polymorphisms and arsenic methylation capacity are associated with urothelial carcinoma	2014	342278000013	Pharmacology & Pharmacy	Toxicology and Applied Pharmacology	0041-008X	3.63	0	0	Taipei Medical University & Hospital	Publ Hlth	Taipei Med Univ	0	0		1	1	1																						1
			Toxicology
Short Duration of Sleep Is Associated with Elevated High-Sensitivity C-Reactive Protein Level in Taiwanese Adults: A Cross-Sectional Study	2014	341136100006	Clinical Neurology	Journal of Clinical Sleep Medicine	1550-9389	2.826	1	1	Buddhist Tzu Chi General Hospital	FM	Buddhist Dalin Tzu Chi Hosp 大林慈濟	0	0		0	0
Prediction of Patient Survival by Change in Daily Opioid Dosage in Advanced Cancer Patients: A Prospective Hospital-based Epidemiologic Study	2014	345772400008	Oncology	Japanese Journal of Clinical Oncology	0368-2811	1.747	1	1	Buddhist Tzu Chi General Hospital	FM	Buddhist Dalin Tzu Chi Hosp 大林慈濟	0	0		1	0
									Tainan Municipal Hospital
Incomplete Hepatitis B Immunization, Maternal Carrier Status, and Increased Risk of Liver Diseases: A 20-Year Cohort Study of 3.8 Million Vaccinees	2014	337969000018	Gastroenterology & Hepatology	Hepatology	0270-9139	11.19	0	0	National Taiwan University & Hospital	Mol & Genom Epidemiol Ctr	China Med Univ	0	0		1	1	1
Relative validity and reproducibility of a quantitative FFQ for assessing nutrient intakes of vegetarians in Taiwan	2014	339620900005	Environmental & Occupational Health	Public Health Nutrition	1368-9800	2.483	0	1	Buddhist Tzu Chi General Hospital	NA	Tzu Chi Fdn	0	0		1	1	1
Taiwanese Vegetarians and Omnivores: Dietary Composition, Prevalence of Diabetes and IFG	2014	331258100063	Multidisciplinary Sciences	Plos One	1932-6203	3.534	0	1	Buddhist Tzu Chi General Hospital	Publ Hlth	Buddhist Dalin Tzu Chi Hosp 大林慈濟	0	0		1	1	1		1																	1
Ubiquitin-Conjugating Enzyme UBE2C Is Highly Expressed in Breast Microcalcification Lesions	2014	334105000122	Multidisciplinary Sciences	Plos One	1932-6203	3.534	0	0	Armed Forces General Hospital	Radio	Kaohsiung Vet Gen Hosp	0	0		1	1																		1
Development of traditional Chinese version of World Health Organization Disability Assessment Schedule 2.0 36-item (WHODAS 2.0) in Taiwan: Validity and reliability analyses	2014	341546300023	Education	Research in Developmental Disabilities	0891-4222	2.735	0	0	Armed Forces General Hospital	Inst Med Sci	Tzu Chi Univ	0	0		1	1	1
			Rehabilitation
Ubiquitin-Conjugating Enzyme UBE2C Is Highly Expressed in Breast Microcalcification Lesions	2014	334105000122	Multidisciplinary Sciences	Plos One	1932-6203	3.534	0	0	Armed Forces General Hospital	Radio	Kaohsiung Vet Gen Hosp	0	0		1	1																		1
Distinct effects of Disabled-2 on transferrin uptake in different cell types and culture conditions	2014	342798200004	Cell Biology	Cell Biology International	1065-6995	1.635	0	0	Chang Gung Memorial Hospital	Biomed Sci	Chang Gung Mem Hosp	0	0		1	1
MicroRNA Gene Polymorphisms and Environmental Factors Increase Patient Susceptibility to Hepatocellular Carcinoma	2014	332389000112	Multidisciplinary Sciences	Plos One	1932-6203	3.534	0	0	Taichung Veterans General Hospital	Inst Med Sci	Chung Shan Med Univ	0	0		1	1	1														1					1
Association of DNA Methyltransferases 3A and 3B Polymorphisms, and Plasma Folate Levels with the Risk of Urothelial Carcinoma	2014	340879300065	Multidisciplinary Sciences	Plos One	1932-6204	3.534	0	0	China Medical University Hospital	Publ Hlth	China Med Univ	0	0		0	1	1																										1
Asthma increases pulmonary thromboembolism risk: a nationwide population cohort study	2014	332816600023	Respiratory System	European Respiratory Journal	0903-1936	7.125	0	1	Chia Yi Christian Hospital	Internal Med	Minist Hlth & Welf, Taichung Hosp	0	0		1	1	1											1								1
Tuberculosis increases the subsequent risk of acute coronary syndrome: a nationwide population-based cohort study	2014	329483000016	Infectious Diseases	International Journal of Tuberculosis and Lung Disease	1027-3719	2.756	0	0	Chia Yi Christian Hospital	Internal Med	Minist Hlth & Welf, Taichung Hosp	0	0		1	1	1																			1
			Respiratory System
Respiratory Syncytial Virus and Other Respiratory Viral Infections in Older Adults With Moderate to Severe Influenza-like Illness	2014	337063100004	Infectious Diseases	Journal of Infectious Diseases	1873-1881	5.778	0	0	Taipei Veterans General Hospital	Sch Med	Univ Rochester	1	Belgium	Europe	1	1					1									1																1
			Immunology										USA	North America
			Microbiology										Canada	North America
													Czech Republic	Europe
													Netherlands	Europe
													France	Europe
													Germany	Europe
													Poland	Europe
													Mexico	Central America
High uric acid level associated with increased arterial stiffness in apparently healthy women	2014	342414700044	Peripheral Vascular Disease	Atherosclerosis	0021-9150	3.971	1	1	National Cheng Kung University & Hospital	FM	Natl Cheng Kung Univ Hosp	0	0		0	0
The effect of bacterial infections in cirrhotic patients with esophageal variceal bleeding	2014	341467200008	Gastroenterology & Hepatology	Annals of Hepatology	1665-2681	2.193	1	0	Buddhist Tzu Chi General Hospital	FM	Buddhist Dalin Tzu Chi Hosp	0	0		1	1														1	1
Long-term booster schedules with AS03(A)-adjuvanted heterologous H5N1 vaccines induces rapid and broad immune responses in Asian adults	2014	333599000001	Infectious Diseases	Bmc Infectious Diseases	1471-2334	2.561	0	0	Taipei Veterans General Hospital	NA	GlaxoSmithKline Vaccines	1	Belgium	Europe	1	1				1
													Hong Kong	Asia
													Thailand	Asia
													Singapore	Asia
Clinical Effectiveness of Acupuncture for Carpal Tunnel Syndrome	2014	333091500004	Integrative & Complementary Medicine	American Journal of Chinese Medicine	0192-415X	2.625	0	0	China Medical University Hospital	中醫	China Med Univ Hosp	0	0		1	1			1
			Medicine, General & Internal
Is lower uric acid level better? A combined cross-sectional and longitudinal study in the elderly	2014	345404900019	Endocrinology & Metabolism	Endocrine	1355-008X	3.527	0	0	Cardinal Tien Hospital	META	Tri Serv Gen Hosp	0	0		1	1																	1			1
Rheumatoid Arthritis and the Risk of Bipolar Disorder: A Nationwide Population-Based Study	2014	342123900045	Multidisciplinary Sciences	Plos One	1932-6203	3.534	0	0	Taipei Veterans General Hospital	Psychi	Kaohsiung Vet Gen Hosp	0	0		1	1	1						1									1
Urban-Rural Disparity of Generics Prescription in Taiwan: The Example of Dihydropyridine Derivatives	2014	331751800001	Multidisciplinary Sciences	Scientific World Journal	1537-744X	1.219	0	0	Taipei Veterans General Hospital	Pharm	Taipei Vet Gen Hosp	0	0		1	1
Impact of a Warning CPOE System on the Inappropriate Pill Splitting of Prescribed Medications in Outpatients	2014	346907200078	Multidisciplinary Sciences	Plos One	1932-6203	3.534	0	0	Taipei Veterans General Hospital	Pharm	Taipei Vet Gen Hosp	0	0		1	1			1																	1		1
Adiposity measurements in association with metabolic syndrome in older men have different clinical implications	2014	333570700005	Nutrition & Dietetics	Nutrition Research	0271-5317	2.585	1	0	Fu Jen Catholic Univ	FM	Fu Jen Catholic Univ	0	0		1	1			1		1												1			1
High normotension is associated with higher metabolic syndrome risk in postmenopausal women	2014	333753700008	Geriatrics & Gerontology	Geriatrics & Gerontology International	1444-1586	1.575	1	0	Fu Jen Catholic Univ	FM	Fu Jen Catholic Univ	0	0		1	1																	1	1		1
Carbon dioxide insufflation can significantly reduce toilet use after colonoscopy: a double-blind randomized controlled trial	2014		Gastroenterology & Hepatology	Endoscopy	0013-726X	5.196	0	0	National Taiwan University & Hospital	Internal Med	Natl Taiwan Univ	0	0		1	1															1					1
			Surgery
Association of cognitive impairment, depressive symptoms and sarcopenia among healthy older men in the veterans retirement community in southern Taiwan: A cross-sectional study	2014	331085800013	Gastroenterology & Hepatology	Geriatrics & Gerontology International	1444-1586	1.575	0	1	Kaohsiung Veterans General Hospital	Geriatric	Kaohsiung Vet Gen Hosp	0	0		1	1					1						1										1
Varenicline versus transdermal nicotine patch: a 3-year follow-up in a smoking cessation clinic in Taiwan	2014	338634100009	Neurosciences	Psychopharmacology	0033-3158	3.988	1	1	Kaohsiung Veterans General Hospital	FM	Kaohsiung Vet Gen Hosp	1	England	Europe	1	1	1			1
			Pharmacology & Pharmacy
			Psychiatry
Diabetes Mellitus and the Risk of Alzheimer's Disease: A Nationwide Population-Based Study	2014	330570000101	Multidisciplinary Sciences	Plos One	1932-6203	3.534	0	0	Taipei Veterans General Hospital	教研	Taipei Vet Gen Hosp	0	0		1	1		1		1				1									1
Sleep apnoea patients have higher mortality when confronting sepsis	2014	328543100006	Medicine, General & Internal	European Journal of Clinical Investigation	0014-2972	2.834	0	0	Taipei Veterans General Hospital	Chest	Taipei Vet Gen Hosp	0	0		1	1	1											1	1			1		1			1	1
			Medicine, Research & Experimental
The relationship between different glycemic statuses and colon polyps in a Taiwanese population	2014	339106600005	Gastroenterology & Hepatology	Journal of Gastroenterology	0944-1174	4.02	1	1	National Cheng Kung University & Hospital	FM	Natl Cheng Kung Univ Hosp	0	0		0	0
Smoking behaviours of adolescents, influenced by smoking of teachers, family and friends	2014	336481300022	Nursing	International Nursing Review	0020-8132	0.736	0	0	Changhua Christian Hospital	NA	Chi Mei Med Ctr奇美	0	0		1	1			1
DNA methylation of PAX1 as a biomarker for oral squamous cell carcinoma	2014	333799600015	Dentistry, Oral Surgery & Medicine	Clinical Oral Investigations	1432-6981	2.285	0	0	Taipei Medical University & Hospital	Dent	Taipei Med Univ	0	0		1	1	1																													1
Hepatitis B Virus X Upregulates HuR Protein Level to Stabilize HER2 Expression in Hepatocellular Carcinoma Cells	2014	332724400001	Biotechnology & Applied Microbiology	Biomed Research International	2314-6133	2.706	0	0	China Medical University Hospital	Surgery	E Da Hosp義大	0	0		1	1			1
			Medicine, Research
			Experimental
Menopause is associated with self-reported poor sleep quality in women without vasomotor symptoms	2014	340559600010	Obstetrics & Gynecology	Menopause-the Journal of the North American Menopause Society	1072-3714	2.887	0	1	National Cheng Kung University & Hospital	META	Natl Cheng Kung Univ Hosp	0	0		0	1																	1			1
Stochastic model for hepatitis B virus infection through maternal (vertical) and environmental (horizontal) transmission with applications to basic reproductive number estimation and economic appraisal of preventive strategies	2014	330342600013	Engineering, Environmental	Stochastic Environmental Research and Risk Assessment	1436-3240	2.673	1	0	National Taiwan University & Hospital	FM	Natl Taiwan Univ	0	0		1	1	1
			Statistics & Probability
Emergency medical service in rural mountain areas in Taiwan: a Nantou mountain areas based study	2014	345310200006	Emergency Medicine	Hong Kong Journal of Emergency Medicine	1024-9079	0.154	0	0	China Medical University Hospital	Publ Hlth	China Med Univ,	0	0		1	1	1																				1		1
Nonalcoholic fatty liver disease vs. obesity on the risk of erosive oesophagitis	2014	345759100001	Medicine, General & Internal	European Journal of Clinical Investigation	0014-2972	2.834	1	1	E Da Hospital	FM	E Da Hospital	0	0		1	1					1
			Medicine, Research & Experimental
Factors affecting the use of anti-malaria preventive measures among Taiwan immigrants returning to malaria-endemic regions	2014	340979600013	Public, Environmental & Occupational Health	Travel Medicine and Infectious Disease	1477-8939	1.538	0	1	Tainan Municipal Hospital	Publ Hlth	Natl Cheng Kung Univ Hosp	0	0		1	1	1	1
			Infectious Diseases
Cancer risk among patients with coal workers' pneumoconiosis in Taiwan: A nationwide population-based study	2014	333751000016	Oncology	International Journal of Cancer	0020-7136	5.007	0	0	Taipei Veterans General Hospital	Hema	Taipei Vet Gen Hosp	0	0		1	1	1															1
Long-term effect of antihypertensive drugs on the risk of new-onset atrial fibrillation: a longitudinal cohort study	2014	343293900013	Peripheral Vascular Disease	Hypertension Research	0916-9636	2.936	0	1	Taichung Veterans General Hospital	Internal Med	Chung Shan Med Univ Hosp	0	0		1	1	1																			1
Investigations of the Pediatric Hospice Care in Taiwan: 2005 to 2010	2014	340095200003	Health Care Sciences & Services	American Journal of Hospice & Palliative Medicine	1049-9091	1.347	1	1	National Yang Ming University & Hospital	FM	Natl Yang Ming Univ Hosp	0	0		1	1																1
									Taipei Veterans General Hospital
Noncancer Hospice Care in Taiwan: A Nationwide Dataset Analysis from 2005 to 2010	2014	333811900009	Health Care Sciences & Services	Journal of Palliative Medicine	1096-6218	2.063	1	1	National Yang Ming University & Hospital	FM	Natl Yang Ming Univ Hosp	0	0		1	1	1		1
									Taipei Veterans General Hospital
Increased risk of ischemic stroke in patients with benign paroxysmal positional vertigo: a 9-year follow-up Nationwide Population Study in Taiwan	2014	339555300001	Geriatrics & Gerontology	Frontiers in Aging Neuroscience	1663-4365	2.843	0	0	Taipei Veterans General Hospital	Rehabilitation	Taipei Vet Gen Hosp	0	0		1	1				1				1																				1
			Neurosciences
Effects of the hospital-based palliative care team on the care for cancer patients: An evaluation study	2014	330816900008	Nursing	International Journal of Nursing Studies	0020-7489	2.248	0	0	National Taiwan University & Hospital	Nursing	Univ Melbourne	1	Australia	Oceania	1	1
Increased Risk of Acute Angle Closure in Retinitis Pigmentosa: A Population-Based Case-Control Study	2014	341774800091	Multidisciplinary Sciences	Plos One	1932-6203	3.534	0	0	Taipei Veterans General Hospital	Ophthalmol	Taipei Vet Gen Hosp	0	0		1	1	1															1
Cross-Sectional and Longitudinal Associations of Categories of Physical Activities with Dimensions of Subjective Well-Being in Taiwanese Older Adults	2014	336992300004	Social Sciences, Interdisciplinary	Social Indicators Research	0303-8300	1.452	0	0	Taipei City Hospital	Sports & Hlth	Natl Changhua Univ彰師大	1	England	Europe	1	1
Risk of ischemic stroke in patients with ovarian cancer: a nationwide population-based study	2014	334712900001	Medicine, General & Internal	Bmc Medicine	1741-7015	7.276	0	0	Taipei Veterans General Hospital	NS	Taipei Vet Gen Hosp	0	0		1	1	1						1					1				1														1
Identification of CaIDAG-GEFI as an intracellular target for the vicinal dithiol binding agent phenylarsine oxide in human platelets	2014	335541500014	Hematology	Thrombosis and Haemostasis	0340-6245	5.76	0	0	Kaohsiung Medical University & Hospital	Toxicity	Kaohsiung Med Univ	0	0		0	1
			Peripheral Vascular Disease
Association Between Recent Use of Fluoroquinolones and Rhegmatogenous Retinal Detachment: A Population-Based Cohort Study	2014	329131300011	Immunology	Clinical Infectious Diseases	1058-4838	9.416	0	0	Taipei Veterans General Hospital	臨醫所	Natl Yang Ming Univ	0	0		1	1	1												1	1							1
			Infectious Diseases
			Microbiology
Effect of whole-body vibration for 3 months on arterial stiffness in the middle-aged and elderly	2014	335653300001	Geriatrics & Gerontology	Clinical Interventions in Aging	1178-1998	1.824	0	1	Chung Shan Medical University & Hospital	Inst Med Sci	Chung Shan Med Univ	0	0		1	1
									Minist Hlth & Welf, Taichung Hospital
Increased Incidence of Gastrointestinal Cancers Among Patients With Pyogenic Liver Abscess: A Population-Based Cohort Study	2014	328736000027	Gastroenterology & Hepatology	Gastroenterology	0016-5085	13.926	0	0	China Medical University Hospital	中醫	China Med Univ Hosp	0	0		1	1	1														1
Association between inflammatory markers and frailty in institutionalized older men	2014	344425900016	Geriatrics & Gerontology	Maturitas	0378-5122	2.861	1	1	National Taiwan University & Hospital	FM	Natl Taiwan Univ	0	0		1	1	1
			Obstetrics & Gynecology						Taipei Veterans General Hospital
									Minist Hlth & Welf, Taipei Hosp
Allyl isothiocyanate inhibits cell metastasis through suppression of the MAPK pathways in epidermal growth factor-stimulated HT29 human colorectal adenocarcinoma cells	2014	330788100026	Oncology	Oncology Reports	1021-335X	2.191	0	0	Taichung Veterans General Hospital	NA	China Med Univ	0	0		1	1																							1
Long-Term Use of Zolpidem Increases the Risk of Major Injury: A Population-Based Cohort Study	2014	335560400005	Medicine, General & Internal	Mayo Clinic Proceedings	0025-6196	5.812	1	0	China Medical University Hospital	FM	China Med Univ Hosp	0	0		1	1	1		1	1
Hearing loss may be a non-motor feature of Parkinson's disease in older people in Taiwan	2014	333911900013	Clinical Neurology	European Journal of Neurology	1351-5101	3.852	1	0	China Medical University Hospital	FM	China Med Univ Hosp	0	0		1	1	1			1																1
			Neurosciences
Irritable bowel syndrome correlates with increased risk of Parkinson's disease in Taiwan	2014	331645200006	Public, Environmental & Occupational Health	European Journal of Epidemiology	0393-2990	5.147	1	0	China Medical University Hospital	FM	China Med Univ Hosp	0	0		1	1	1
Gout and Parkinson's Disease in Older People: An Observation in Taiwan	2014	343793000013	Geriatrics & Gerontology	International Journal of Gerontology	1873-9598	0.473	1	0	China Medical University Hospital	FM	China Med Univ Hosp	0	0		1	1	1			1																1
No Association between Schizophrenia and Female Hepatocellular carcinoma: A Case-Control Study in Taiwan	2014	342483400005	Medicine, General & Internal	Kuwait Medical Journal	0023-5776	0.098	1	0	China Medical University Hospital	FM	China Med Univ Hosp	0	0		1	1	1																			1
Cataract may be a non-memory feature of Alzheimer's disease in older people	2014	338325000003	Public, Environmental & Occupational Health	European Journal of Epidemiology	0393-2990	5.147	1	0	China Medical University Hospital	FM	China Med Univ Hosp	0	0		1	1	1																			1
Increased risk of pulmonary tuberculosis among patients with appendectomy in Taiwan	2014	340538700014	Infectious Diseases	European Journal of Clinical Microbiology & Infectious Diseases	0934-9723	2.544	1	1	China Medical University Hospital	FM	China Med Univ Hosp	0	0		1	1	1																			1
			Microbiology
Use of Proton Pump Inhibitors Correlates with Increased Risk of Pancreatic Cancer: A Case-Control Study in Taiwan	2014	332495300007	Medicine, General & Internal	Kuwait Medical Journal	0023-5776	0.098	1	0	China Medical University Hospital	FM	China Med Univ Hosp	0	0		1	1	1																			1
Splenectomy correlates with increased risk of pulmonary tuberculosis: a case-control study in Taiwan	2014	341516600022	Infectious Diseases	Clinical Microbiology and Infection	1198-743X	5.197	1	0	China Medical University Hospital	FM	China Med Univ Hosp	0	0		1	1	1											1	1							1		1
			Microbiology
Non-cephalosporin-susceptible, glucose non-fermentative Gram-negative bacilli meningitis in post-neurosurgical adults: Clinical characteristics and therapeutic outcome	2014	331483100012	Clinical Neurology	Clinical Neurology and Neurosurgery	0303-8467	1.248	1	0	Chang Gung Memorial Hospital	FM	Kaohsiung Chang Gung Mem Hosp	0	0		0	1											1
			Surgery
Spinal cord injury increases the risk of Type 2 diabetes: a population-based cohort study	2014	341305100023	Clinical Neurology	Spine Journal	1529-9430	2.8	0	0	Taichung Veterans General Hospital	META	Taichung Vet Gen Hosp	0	0		1	1	1
			Orthopedics
A Comparison of Vasopressin, Terlipressin, and Lactated Ringers for Resuscitation of Uncontrolled Hemorrhagic Shock in an Animal Model	2014	335298200093	Multidisciplinary Sciences	Plos One	1932-6203	3.534	0	0	Chang Gung Memorial Hospital	Emergency Med	Natl Taiwan Univ	0	0		1	1					1																1
Betel-quid dependence domains and syndrome associated with betel-quid ingredients among chewers: an Asian multi-country evidence	2014	337569200027	Substance Abuse	Addiction	0965-2140	4.894	0	0	China Medical University Hospital	Publ Hlth	Kaohsiung Med Univ	1	England	Europe	1	1	1	1					1
			Psychiatry										Norway	Europe
													Indonesia	Asia
													Malaysia	Asia
													Peoples R China	Asia
Risk evaluation for the development of cervical intraepithelial neoplasia: Development and validation of risk-scoring schemes	2014	344596600012	Oncology	International Journal of Cancer	0020-7136	5.007	0	0	Kaohsiung Medical University & Hospital	Publ Hlth	Kaohsiung Med Univ	0	0		1	1	1	1																												1
Providing Hospice Home Care to the Terminally Ill Elderly People With Cancer in Taiwan: Family Experiences and Needs	2014	342571500007	Health Care Sciences & Services	American Journal of Hospice & Palliative Medicine	1049-9091	1.347	0	0	National Taiwan University & Hospital	Nursing	Natl Taiwan Univ	1	England	Europe	1	1	1					1
													Scotland	Europe
Factors Affecting the Place of Death Among Hospice Home Care Cancer Patients in Taiwan	2014	335772400011	Health Care Sciences & Services	American Journal of Hospice & Palliative Medicine	1049-9091	1.347	1	0	Taichung Veterans General Hospital	FM	Taichung Vet Gen Hosp	0	0		1	1							1																							1
Turmeric improves post-prandial working memory in pre-diabetes independent of insulin	2014	347143600010	Nutrition & Dietetics	Asia Pacific Journal of Clinical Nutrition	0964-7058	1.36	0	0	Tri-Service General Hospital	Publ Hlth	Natl Def Med Ctr	0	0		1	1	1
			Gerontology
Antihypertensive Agents and Risk of Parkinson's Disease: A Nationwide Cohort Study	2014	337165600029	Multidisciplinary Sciences	Plos One	1932-6203	3.534	1	0	Cathay General Hospital	FM	Cathay Gen Hosp	0	0		1	1	1							1			1
Moderate to severe, but not mild, nonalcoholic fatty liver disease associated with increased risk of gallstone disease	2014	340829600014	Gastroenterology & Hepatology	Scandinavian Journal of Gastroenterology	0036-5521	2.329	1	1	National Cheng Kung University & Hospital	FM	Natl Cheng Kung Univ Hosp	0	0		0	0
Increased Tea Consumption Is Associated with Decreased Arterial Stiffness in a Chinese Population	2014	330283100099	Multidisciplinary Sciences	Plos One	1932-6203	3.534	1	1	National Cheng Kung University & Hospital	FM	Natl Cheng Kung Univ Hosp	0	0		1	0
									China Medical University Hospital
Successful aging defined by health-related quality of life and its determinants in community-dwelling elders	2014	343282600001	Public	Bmc Public Health	1471-2458	2.321	0	0	China Medical University Hospital	Dept Med Res	China Med Univ Hosp	0	0		1	1			1				1
			Environmental & Occupational Health
High Dosage of Hypnotics Predicts Subsequent Sleep-Related Breathing Disorders and Is Associated with Worse Outcomes for Depression	2014	333673100020	Clinical Neurology	Sleep	0161-8105	5.062	0	0	Taipei Veterans General Hospital	Psychi	Taipei Vet Gen Hosp	0	0		0	1							1
			Neurosciences
Methylation status of retinoic acid receptor beta2 promoter and global DNA in esophageal squamous cell carcinoma	2014	334183600020	Oncology	Journal of Surgical Oncology	0022-4790	2.843	0	0	Kaohsiung Medical University & Hospital	Biomed Sci	Kaohsiung Med Univ	0	0		1	1	1														1								1
			Surgery
Association between waist-to-height ratio and chronic kidney disease in the Taiwanese population	2014	339264300005	Medicine	Internal Medicine Journal	1444-0903	1.699	0	0	Chang Gung Memorial Hospital	Dept Occupat Med	Keelung Chang Gung Mem Hosp	0	0		1	1																					1
			General & Internal
Age and gender differences in the relationship between hepatitis C infection and all stages of Chronic kidney disease	2014	341717400013	Gastroenterology & Hepatology	Journal of Viral Hepatitis	1352-0504	3.307	0	0	Chang Gung Memorial Hospital	Dept Occupat Med	Keelung Chang Gung Mem Hosp	0	0		1	1																					1
			Infectious Diseases
			Virology
Magnolol Reduced TNF-alpha-Induced Vascular Cell Adhesion Molecule-1 Expression in Endothelial Cells via JNK/p38 and NF-kappa B Signaling Pathways	2014	336928500008	Integrative & Complementary Medicine	American Journal of Chinese Medicine	0192-415X	2.625	0	0	National Taiwan University & Hospital	Dept Anat & Cell Biol 解剖暨細胞生物學科	Natl Taiwan Univ	0	0		1	1																				1
			Medicine
			General & Internal
Gait speed and risk assessment for falls among men aged 80 years and older: A prospective cohort study in Taiwan	2014	343092500003	Geriatrics & Gerontology	European Geriatric Medicine	1878-7649	0.552	0	0	Kaohsiung Veterans General Hospital	Neuro	Kaohsiung Vet Gen Hosp	0	0		1	1					1		1						1								1
Interrelationship of Postoperative Delirium and Cognitive Impairment and Their Impact on the Functional Status in Older Patients Undergoing Orthopaedic Surgery: A Prospective Cohort Study	2014	345158700004	Multidisciplinary Sciences	Plos One	1932-6203	3.534	0	0	Kaohsiung Veterans General Hospital	Neuro	Kaohsiung Vet Gen Hosp	0	0		1	1					1		1						1																		1
Identified single-nucleotide polymorphisms and haplotypes at 16q22.1 increase diabetic nephropathy risk in Han Chinese population	2014	345784600001	Genetics & Heredity	Bmc Genetics	1471-2156	2.356	0	0	China Medical University Hospital	Publ Hlth	China Med Univ	1	USA	North America	1	1	1		1														1
Independent and joint effect of type 2 diabetes and gastric and hepatobiliary diseases on risk of pancreatic cancer risk: 10-year follow-up of population-based cohort	2014	345597700019	Oncology	British Journal of Cancer	0007-0920	4.817	1	0	China Medical University Hospital	FM	China Med Univ Hosp	0	0		1	1				1			1																				1
Cancer risks among patients with type 2 diabetes: a 10-year follow-up study of a nationwide population-based cohort in Taiwan	2014	341196000001	Oncology	Bmc Cancer	1471-2407	3.319	1	0	China Medical University Hospital	FM	China Med Univ Hosp	0	0		1	1			1	1																							1
Risks of Decreased Renal Function and Increased Albuminuria for Glycemic Status and Metabolic Syndrome Components: Taichung Community Health Study	2014	336295600001	Biotechnology & Applied Microbiology	Biomed Research International	2314-6133	2.706	1	0	China Medical University Hospital	FM	China Med Univ Hosp	0	0		1	1			1	1			1										1
			Medicine
			Research & Experimental
Heritability of cardiovascular risk factors in a Chinese population - Taichung Community Health Study and Family Cohort	2014	342411000936	Peripheral Vascular Disease	Atherosclerosis	0021-9150	3.971	1	0	China Medical University Hospital	FM	China Med Univ Hosp	1	USA	North America	1	1	1		1	1
Association of CRP gene polymorphisms with serum CRP level and handgrip strength in community-dwelling elders in Taiwan: Taichung Community Health Study for Elders (TCHS-E)	2014	341374300018	Geriatrics & Gerontology	Experimental Gerontology	0531-5565	3.529	1	0	China Medical University Hospital	FM	China Med Univ Hosp	0	0		1	1	1			1
Visit-to-visit variability of fasting plasma glucose as predictor of ischemic stroke: competing risk analysis in a national cohort of Taiwan Diabetes Study	2014	344889400001	Medicine	Bmc Medicine	1741-7015	7.276	1	0	China Medical University Hospital	FM	China Med Univ Hosp	0	0		1	1			1	1							1						1
			General & Internal
Oral Lactobacillus reuteri GMN-32 treatment reduces blood glucose concentrations and promotes cardiac function in rats with streptozotocin- induced diabetes mellitus	2014	332943600004	Nutrition & Dietetics	British Journal of Nutrition	0007-1145	3.342	1	0	China Medical University Hospital	FM	China Med Univ Hosp	0	0		1	1			1	1
Resveratrol enhanced FOXO3 phosphorylation via synergetic activation of SIRT1 and PI3K/Akt signaling to improve the effects of exercise in elderly rat hearts	2014	343801300007	Geriatrics & Gerontology	Age	0161-9152	3.445	1	0	China Medical University Hospital	FM	China Med Univ Hosp	0	0		1	1				1				1
A Novel Caveolin-1 Biomarker for Clinical Outcome of Sarcopenia	2014	336075800016	Medicine	In Vivo	0258-851X	1.148	1	0	China Medical University Hospital	FM	China Med Univ Hosp	0	0		1	1
			Research & Experimental
Association of Caveolin-1 Genotypes with Gastric Cancer in Taiwan	2014	335545900023	Oncology	Anticancer Research	0250-7005	1.072	1	0	China Medical University Hospital	FM	China Med Univ Hosp	0	0		1	1
Arsenic methylation capacity and obesity are associated with insulin resistance in obese children and adolescents	2014	347274600009	Food Science & Technology	Food and Chemical Toxicology	0278-6915	2.61	0	0	Chang Gung Memorial Hospital	Pediatrics	Taipei Med Univ	0	0		1	1	1																				1
			Toxicology
Transarterial Chemoembolization-induced Tumor Lysis Syndrome: Different Results in the Same Hepatocellular Carcinoma Patient	2014	343793000015	Geriatrics & Gerontology	International Journal of Gerontology	1873-9598	0.473	0	0	Mackay Memoral Hospital	GI	Mackay Mem Hosp	0	0		0	1															1
The association of metabolic syndrome and its factors with gallstone disease	2014	339677200001	Primary Health Care	Bmc Family Practice	1471-2296	1.735	1	1	Changhua Christian Hospital	FM	Changhua Christian Hosp	0	0		1	1			1	1
			Medicine
			General & Internal
Identification of Insulin Resistance in Subjects with Normal Glucose Tolerance	2014	333442500008	Medicine	Annals Academy of Medicine Singapore	0304-4602	1.221	0	0	Cardinal Tien Hospital	Meta	Taipei Med Univ	0	0		1	1																	1			1
			General & Internal
Estimation of the disposition index based on components of metabolic syndrome	2014	341226400007	Endocrinology & Metabolism	Endocrine Journal	0918-8959	2.019	0	0	Cardinal Tien Hospital	Meta	Taipei Med Univ	0	0		1	1																	1
Late-life depression and quality of life in a geriatric evaluation and management unit: an exploratory study	2014	338747000001	Geriatrics & Gerontology	Bmc Geriatrics	1471-2318	2	0	0	Taichung Veterans General Hospital	Psychi	Taichung Vet Gen Hosp	0	0		1	1					1		1			1
			Gerontology
A Smartphone APP for Health and Tourism Promotion	2014	336318700001	Engineering, Multidisciplinary	Mathematical Problems in Engineering	1024-123X	1.082	0	0	Lin Shin Hospital	NA	Minist Hlth & Welf, Nantou Hosp	0	0		1	1			1	1
			Mathematics, Interdisciplinary Applications
Migraine is associated with a higher risk of transient global amnesia: a nationwide cohort study	2014	333911900008	Clinical Neurology	European Journal of Neurology	1351-5101	3.852	0	0	Taipei Veterans General Hospital	Neuro	Taipei Vet Gen Hosp, Taoyuan Branch	0	0		1	1				1							1		1
			Neurosciences
Family medicine publications in Taiwan: An analysis of the Web of Science database from 1993 to 2012	2014	345109300007	Medicine, General & Internal	Journal of the Chinese Medical Association	1726-4901	0.889	1	1	Taipei Veterans General Hospital	FM	Taipei Vet Gen Hosp	0	0		1	1				1
Prevention of Asymptomatic Bacteriuria with Cranberries and Roselle Juice in Home-care Patients with Long-term Urinary Catheterization	2014	343793000010	Geriatrics & Gerontology	International Journal of Gerontology	1873-9598	0.473	0	0	Mackay Memoral Hospital	Nursing	Mackay Mem Hosp	0	0		1	1			1	1									1		1
Relationship between betel quid chewing and risks of cardiovascular disease in older adults: A cross-sectional study in Taiwan	2014	339149300020	Substance Abuse	Drug and Alcohol Dependence	0376-8716	3.278	0	1	New Taipei City Hosp	Internal Med	New Taipei City Hosp	0	0		1	1												1								1			1
			Psychiatry
Beneficial effect of quercetin on cholestatic liver injury	2014	344205600010	Biochemistry & Molecular Biology	Journal of Nutritional Biochemistry	0955-2863	4.592	0	0	Taichung Veterans General Hospital	META	Taichung Vet Gen Hosp	0	0		1	1			1
			Nutrition & Dietetics
Increased Lung Cancer Risk Among Patients with Pneumococcal Pneumonia: A Nationwide Population-Based Cohort Study	2014	330958000036	Respiratory System	Lung	0341-2040	2.171	0	0	Chia Yi Christian Hospital	Infection	Tri Serv Gen Hosp	0	0		1	1	1		1											1						1												1
Autistic spectrum disorder, attention deficit hyperactivity disorder, and allergy: Is there a link? A nationwide study	2014	341552100008	Education, Special	Research in Autism Spectrum Disorders	1750-9467	2.378	0	0	Taipei Veterans General Hospital	Psychi	Kaohsiung Med Univ Hosp	0	0		1	1							1
			Psychology, Developmental
			Psychiatry
			Rehabilitation
Gastroesophageal Reflux Disease and Risk for Bipolar Disorder: A Nationwide Population-Based Study	2014	344862300028	Multidisciplinary Sciences	Plos One	1932-6203	3.534	0	0	Taipei Veterans General Hospital	Psychi	Kaohsiung Vet Gen Hosp	0	0		1	1	1						1								1	1
Hospice shared-care saved medical expenditure and reduced the likelihood of intensive medical utilization among advanced cancer patients in Taiwan-a nationwide survey	2014	336936100022	Oncology	Supportive Care in Cancer	0941-4355	2.495	1	1	China Medical University Hospital	FM	China Med Univ Hosp	1	USA	North America	1	1			1	1												1							1
			Health Care Sciences & Services						National Taiwan University & Hospital
			Rehabilitation
Design of a Real-Time and Continua-Based Framework for Care Guideline Recommendations	2014	335762700037	Environmental Sciences	International Journal of Environmental Research and Public Health	1660-4601	1.993	0	0	National Cheng Kung University & Hospital	Comp Sci & Informat Engn	Natl Cheng Kung Univ Hosp	0	0		0	1
Cirrhosis as a Risk Factor for Tuberculosis Infection-A Nationwide Longitudinal Study in Taiwan	2014	339808200014	Public, Environmental & Occupational Health	American Journal of Epidemiology	0002-9262	4.975	1	1	Kaohsiung Medical University & Hospital	FM	Kaohsiung Med Univ Hosp	0	0		1	1	1												1	1	1					1
Increased cancer risk in patients with haemophilia A: a nationwide population-based 14-year study in Taiwan	2014	344525800021	Hematology	Haemophilia	1351-8216	2.468	0	0	Taipei Veterans General Hospital	Hema	Taipei Vet Gen Hosp	0	0		1	1	1															1
PEGylation Site-Dependent Structural Heterogeneity Study of MonoPEGylated Human Parathyroid Hormone Fragment hPTH(1-34)	2014	342607000020	Chemistry, Multidisciplinary	Langmuir	0743-7463	4.384	0	0	National Taiwan University & Hospital	Mat Sci & Engn	Natl Chiao Tung Univ	1	USA	North America	1	1
			Materials Science, Multidisciplinary
Predicting metabolic syndrome by using hematogram models in elderly women	2014	331905100004	Cell Biology	Platelets	0953-7104	2.627	0	0	Fu Jen Catholic Univ	META	Dalian Med Univ,Peoples R China	1	Peoples R China	Asia	1	1																	1			1
			Hematology
Sarcopenia, and its association with cardiometabolic and functional characteristics in Taiwan: Results from I-Lan Longitudinal Aging Study	2014	331085800005	Geriatrics & Gerontology	Geriatrics & Gerontology International	1444-1586	1.575	0	0	Taipei Veterans General Hospital	Geriatrics	Taipei Vet Gen Hosp	0	0		0	1	1				1
No adverse impact of depressive symptoms on the effectiveness of postacute care service: A multicenter male-predominant prospective cohort study	2014	331352500008	Medicine, General & Internal	Journal of the Chinese Medical Association	1726-4901	0.889	0	0	Kaohsiung Veterans General Hospital	Psychi	Kaohsiung Vet Gen Hosp	0	0		1	1					1		1				1
Characterizing the Temporal Dynamics of Human Papillomavirus DNA Detectability Using Short-Interval Sampling	2014	335143400022	Oncology	Cancer Epidemiology Biomarkers & Prevention	1055-9965	4.324	0	1	Chang Gung Memorial Hospital	Publ Hlth	Johns Hopkins Univ	1	USA	North America	1	1	1
			Public, Environmental & Occupational Health										Malaysia	Asia
The Link of Sexual Sensation Seeking to Acceptance of Cybersex, Multiple Sexual Partners, and One-Night Stands Among Taiwanese College Students	2014	341249100008	Nursing	Journal of Nursing Research	1682-3141	0.844	0	0	National Taiwan University & Hospital	Communication	Natl Chung Cheng Univ	1	USA	North America	1	1
Activation of free fatty acid receptor 1 improves hepatic steatosis through a p38-dependent pathway	2014	345620300008	Endocrinology & Metabolism	Journal of Molecular Endocrinology	0952-5041	3.621	0	0	National Cheng Kung University & Hospital	META	Natl Cheng Kung Univ Hosp	0	0		0	1																	1
Systemic Sclerosis and the Risk of Tuberculosis	2014	341824300016	Rheumatology	Journal of Rheumatology	0315-162X	3.173	0	0	Taipei Veterans General Hospital	Nephro	Taipei Vet Gen Hosp	0	0		1	1	1									1	1	1	1			1					1												1
Association of polypharmacy with fall-related fractures in older Taiwanese people: age- and gender-specific analyses	2014	333921300027	Medicine, General & Internal	Bmj Open	2044-6055	2.063	0	0	Taipei Veterans General Hospital	Nursing	Tri Serv Gen Hosp	0	0		1	1							1
Protective effects of rutin on liver injury induced by biliary obstruction in rats	2014	339695600012	Biochemistry & Molecular Biology	Free Radical Biology and Medicine	0891-5849	5.71	0	0	Taichung Veterans General Hospital	Pediatric	Tungs Taichung MetroHarbor Hosp童綜合	0	0		1	1																	1																1
			Endocrinology & Metabolism
Risk of Depressive Disorder following Non-Alcoholic Cirrhosis: A Nationwide Population-Based Study	2014	331262600099	Multidisciplinary Sciences	Plos One	1932-6203	3.534	0	0	Taipei Veterans General Hospital	GI	Taipei Vet Gen Hosp	0	0		1	1	1						1					1			1	1														1
Parental smoking and childhood obesity: higher effect estimates for maternal smoking in pregnancy compared with paternal smoking-a meta-analysis	2014	343972200033	Public, Environmental & Occupational Health	International Journal of Epidemiology	0300-5771	9.197	0	0	Taipei City Hospital	Pediatric	Univ Munich, Germany	1	Germany	Europe	1	1	1	1	1
													Canada	North America
													England	Europe
													Australia	Oceania
Delayed time from first medical visit to diagnosis for breast cancer patients in Taiwan	2014	343791800005	Medicine, General & Internal	Journal of the Formosan Medical Association	0929-6646	1.695	0	0	China Medical University Hospital	Publ Hlth	China Med Univ Hosp	0	0		1	1		1		1																												1
The Translational Proteome Modulated by 20(S)-Protopanaxadiol in Endothelial Cells	2014	341958800010	Cardiac & Cardiovascular Systems	Acta Cardiologica Sinica	1011-6842	0.845	1	0	Taipei Medical University & Hospital	FM	Taipei Med Univ, Wan Fang Med Ctr	0	0		1	1			1																														1
Proton pump inhibitor use represents an independent risk factor for myocardial infarction	2014	343895000093	Cardiac & Cardiovascular Systems	International Journal of Cardiology	0167-5273	6.175	0	0	Taipei Veterans General Hospital	Neuro	Taipei Vet Gen Hosp	0	0		1	1											1		1
Urinary Calculi and Risk of Cancer A Nationwide Population-Based Study	2014	346985700030	Medicine, General & Internal	Medicine	0025-7974	4.867	0	0	Taipei Veterans General Hospital	Nephro	Taipei Vet Gen Hosp	0	0		1	1													1
Hepatitis B virus infection and the risk of male infertility: a population-based analysis	2014	345613600032	Obstetrics & Gynecology	Fertility and Sterility	0015-0282	4.295	1	0	Taipei Medical University & Hospital	FM	Taipei Med Univ Hosp	0	0		1	1	1
			Reproductive Biology						China Medical University Hospital
Chronic Hepatitis C Virus Infection Is Associated with the Development of Rheumatoid Arthritis: A Nationwide Population-Based Study in Taiwan	2014	346906600059	Multidisciplinary Sciences	Plos One	1932-6203	3.534	1	0	Taipei Medical University & Hospital	FM	Taipei Med Univ Hosp	0	0		1	1	1									1
Atopic dermatitis and risk of ischemic stroke: A nationwide population-based study	2014	330849300004	Medicine, General & Internal	Annals of Medicine	0785-3890	4.733	0	0	Taipei Veterans General Hospital	Chest	Taipei Vet Gen Hosp	0	0		1	1										1		1		1		1				1
Sleep apnea and risk of pneumonia: a nationwide population-based study	2014	337269700018	Medicine, General & Internal	Canadian Medical Association Journal	0820-3946	5.808	1	0	Taipei Veterans General Hospital	Chest	Taipei Vet Gen Hosp	0	0		1	1	1											1				1		1			1
Effects of Marital Status and Shift Work on Family Function among Registered Nurses	2014	340218500004	Environmental Sciences	Industrial Health	0019-8366	1.045	1	1	Kaohsiung Medical University & Hospital	FM	Kaohsiung Med Univ Hosp	0	0		1	1	1	1		1
			Public, Environmental & Occupational Health
			Toxicology
A Community-Based Walk-In Screening of Depression in Taiwan	2014	343455100001	Multidisciplinary Sciences	Scientific World Journal	1537-744X	1.219	1	0	Kaohsiung Municipal Tatung Hospital	FM	Kaohsiung Municipal Tatung Hosp	0	0		1	1											1
Effect of the Herbal Drug Guilu Erxian Jiao on Muscle Strength, Articular Pain, and Disability in Elderly Men with Knee Osteoarthritis	2014	344267900001	Integrative & Complementary Medicine	Evidence-Based Complementary and Alternative Medicine	1741-427X	2.175	0	0	Taichung Veterans General Hospital	中醫	Taichung Vet Gen Hosp	0	0		1	1			1		1					1
Comparison of various formulae for estimating low-density lipoprotein cholesterol by a combination of ages and genders in Taiwanese adults	2014	341324500001	Cardiac & Cardiovascular Systems	Bmc Cardiovascular Disorders	1471-2261	1.5	1	0	Cheng Ching Gen Hosp	FM	Cheng Ching Gen Hosp	0	0		1	1			1
The Number of Metabolic Abnormalities Associated with the Risk of Gallstones in a Non-diabetic Population	2014	332479400062	Multidisciplinary Sciences	Plos One	1932-6203	3.534	1	1	National Cheng Kung University & Hospital	FM	Tainan Municipal An Nan Hosp	0	0		0	0
RISK OF CENTRAL SEROUS CHORIORETINOPATHY IN ADULTS PRESCRIBED ORAL CORTICOSTEROIDS A Population-Based Study in Taiwan	2014	341630400025	Ophthalmology	Retina-the Journal of Retinal and Vitreous Diseases	0275-004X	3.177	0	0	Taichung Veterans General Hospital	Oph	Natl Yang Ming Univ Hosp	0	0		1	1	1			1				1
Liver function tests may be useful tools for advanced cancer patient care: A preliminary single-center result	2014	332404900006	Medicine	Kaohsiung Journal of Medical Sciences	1607-551X	0.805	1	1	Kaohsiung Municipal Tatung Hospital	FM	Kaohsiung Municipal Tatung Hosp	0	0		1	1	1												1							1
			Research & Experimental						Kaohsiung Medical University & Hospital
Disabled-2 Is Required for Efficient Hemostasis and Platelet Activation by Thrombin in Mice	2014	344056400007	Hematology	Arteriosclerosis Thrombosis and Vascular Biology	1079-5642	5.533	0	1	Chang Gung Memorial Hospital	Grad Inst Biomed Sci	Chang Gung Univ	1	USA	North America	1	1
			Peripheral Vascular Disease
TIMP-3-1296 T > C and TIMP-4-55 T > C gene polymorphisms play a role in the susceptibility of hepatocellular carcinoma among women	2014	343662000079	Oncology	Tumor Biology	1010-4283	2.84	0	0	Taichung Veterans General Hospital	Nursing	Taipei Med Univ	0	0		1	1	1														1								1
Risk of epilepsy in patients with systemic lupus erythematosus - a retrospective cohort study	2014	341128500002	Clinical Neurology	Neuropsychiatric Disease and Treatment	1178-2021	2.154	0	0	China Medical University Hospital	Pediatrics	Chung Shan Med Univ Hosp	0	0		1	1				1
			Psychiatry
Effect of uraemic status on immunofluorescence and enzyme-linked immunosorbent assays for detection of human herpesvirus type 8 antibodies	2014	342231400013	Pathology	Pathology	0031-3025	2.62	0	0	Buddhist Tzu Chi General Hospital	nephro	Buddhist Dalin Tzu Chi Hosp	0	0		1	1													1
Troglitazone and Delta 2Troglitazone Enhance Adiponectin Expression in Monocytes/Macrophages through the AMP-Activated Protein Kinase Pathway	2014	344673000001	Cell biology	Mediators of Inflammation	0962-9351	2.417	1	1	National Taiwan University & Hospital	FM	Natl Taiwan Univ	1	USA	North America	1	1	1																			1
			Immunology
Increased risk of autism spectrum disorder among early life asthma patients: An 8-year nationwide population-based prospective study	2014	332429100005	Education	Research in Autism Spectrum Disorders	1750-9467	2.378	0	0	Taipei Veterans General Hospital	Psychi	Chang Gung Mem Hosp	0	0		1	1				1			1
			Psychology
			Developmental
			Rehabilitation
Long Sleep Duration Associated With a Higher Risk of Increased Arterial Stiffness in Males	2014	341512100008	Clinical Neurology	Sleep	0161-8105	5.062	1	1	National Cheng Kung University & Hospital	FM	Natl Cheng Kung Univ Hosp	0	0		0	0
			Neurosciences
Isolated rotational nystagmus may be the only clue to the early diagnosis of dorsolateral medullary infarction	2014	338222300004	Emergency Medicine	American Journal of Emergency Medicine	0735-6757	1.152	0	0	Armed Forces General Hospital	Ortho	Taoyuan Armed Forces Gen Hosp	0	0		1	1																				1											1
Tea-drinking habit among new university students: Associated factors	2014	329977700007	Medicine	Kaohsiung Journal of Medical Sciences	1607-551X	0.805	0	1	National Cheng Kung University & Hospital	Psychi	Natl Cheng Kung Univ	0	0		1	1	1						1
			Research & Experimental
The correlation between renal function and bone mineral density	2014	344639000001	Urology & Nephrology	Minerva Urologica E Nefrologica	0393-2249	0.7	0	1	Puli Christian Hospital	Ortho	Natl Taiwan Univ Hosp	0	0		1	1																															1
Impaired thrombin generation in Reelin-deficient mice: a potential role of plasma Reelin in hemostasis	2014	346264900015	Hematology	Journal of Thrombosis and Haemostasis	1538-7933	5.55	0	0	Chang Gung Memorial Hospital	Dept Med Biotechnol & Lab Sci	Chang Gung Univ	0	0		1	1
			Peripheral Vascular Disease
The Relationships Among Physician and Hospital Volume, Processes, and Outcomes of Care for Acute Myocardial Infarction	2014	337723900009	Health Care Sciences & Services	Medical Care	0025-7079	2.941	0	0	Cardinal Tien Hospital	Inst Hlth Policy & Management	Natl Taiwan Univ	0	0		1	1	1			1																1
			Health Policy & Services
			Public, Environmental & Occupational Health
Coprescription of Chinese herbal medicine and Western medication among female patients with breast cancer in Taiwan: analysis of national insurance claims	2014	335450100001	Medicine	Patient Preference and Adherence	1177-889X	1.491	0	0	Taipei Veterans General Hospital	Pharm	Taipei Vet Gen Hosp	0	0		1	1				1																			1
			General & Internal
Drugs Cheaper Than Threepenny: The Market of Extremely Low-Priced Drugs within the National Health Insurance in Taiwan	2014	332548700001	Multidisciplinary Sciences	Drugs Cheaper Than Threepenny: The Market of Extremely Low-Priced Drugs within the National Health Insurance in Taiwan	1537-744X	1.219	0	0	Taipei Veterans General Hospital	Pharm	Taipei Vet Gen Hosp	0	0		1	1				1
Enigmatic Ectopic Fat: Prevalence of Nonalcoholic Fatty Pancreas Disease and Its Associated Factors in a Chinese Population	2014	336794500050	Cardiac & Cardiovascular Systems	Journal of the American Heart Association	2047-9980	2.882	0	1	National Cheng Kung University & Hospital	Internal medicine	Natl Cheng Kung Univ Hosp	0	0		1	1																				1
									National Taiwan University & Hospital
Prevalence and Risk Factors of Asymptomatic Colorectal Polyps in Taiwan	2014	338532000001	Gastroenterology & Hepatology	Gastroenterology Research and Practice	1687-6121	1.502	1	0	Kaohsiung Veterans General Hospital	FM	Kaohsiung Vet Gen Hosp	0	0		1	1	1							1							1								1									1
Increased risk of hip fractures in patients with dementia: a nationwide population-based study	2014	342373200001	Clinical Neurology	Bmc Neurology	1471-2377	2.486	0	0	E Da Hospital	NS	Natl Cheng Kung Univ	0	0		1	1				1							1		1										1					1
Newly Diagnosed Dementia and Increased Risk of Hemorrhagic Stroke: A Nationwide Population-based Study	2014	334058100010	Clinical Neurology	Current Alzheimer Research	1567-2050	3.796	0	0	E Da Hospital	NS	E Da Hospital	0	0		1	1				1									1															1
			Neurosciences
Not only hysterectomy but also cesarean section can predict incomplete flexible sigmoidoscopy among patients with prior abdominal or pelvic surgery	2014	334014600003	Medicine	Journal of the Chinese Medical Association	1726-4901	0.889	0	0	Kaohsiung Veterans General Hospital	GI	Kaohsiung Vet Gen Hosp	0	0		1	1															1
			General & Internal
Zoledronic acid induces apoptosis and autophagy in cervical cancer cells	2014	346863700027	Oncology	Tumor Biology	1010-4283	2.84	0	1	Taipei Medical University & Hospital	GYN	Taipei Med Univ Hosp	0	0		1	1																														1
Risk of New-Onset Diabetes Mellitus Versus Reduction in Cardiovascular Events With Statin Therapy	2014	331772800010	Cardiac & Cardiovascular Systems	American Journal of Cardiology	0002-9149	3.425	0	0	Taipei Veterans General Hospital	教研部	Taipei Vet Gen Hosp	0	0		1	1	1
Sitagliptin and the risk of hospitalization for heart failure: A population-based study	2014	343895000045	Cardiac & Cardiovascular Systems	International Journal of Cardiology	0167-5273	6.175	0	0	Taipei Veterans General Hospital	教研部	Taipei Vet Gen Hosp	0	0		1	1				1				1
Incidence and risk analysis of aortic aneurysm and aortic dissection among patients with systemic lupus erythematosus: a nationwide population-based study in Taiwan	2014	339103900007	Rheumatology	Lupus	0961-2033	2.481	0	0	Taipei Veterans General Hospital	AIR	Shuang Ho Hosp	0	0		1	1										1						1
In-Depth Comparative Characterization of Hemoglobin Glycation in Normal and Diabetic Bloods by LC-MSMS	2014	334513600009	Biochemical Research Methods	Journal of the American Society for Mass Spectrometry	1044-0305	3.193	0	0	National Cheng Kung University & Hospital	Dept Chem	Natl Cheng Kung Univ	0	0		1	1
			Analytical
			Chemistry
			Spectroscopy
Activation of Hepatic Inflammatory Pathways by Catecholamines Is Associated With Hepatic Insulin Resistance in Male Ischemic Stroke Rats	2014	342342000009	Endocrinology & Metabolism	Endocrinology	0013-7227	4.644	1	0	Taichung Veterans General Hospital	FM	Taichung Vet Gen Hosp	0	0		1	1																	1
Higher uric acid is associated with higher rate of metabolic syndrome in Chinese elderly	2014	334020500007	Geriatrics & Gerontology	European Geriatric Medicine	1878-7649	0.552	1	0	Cardinal Tien Hospital	FM	Cardinal Tien Hosp耕莘	0	0		1	1																	1			1
Cancer risk among gingivitis and periodontitis patients: a nationwide cohort study	2014	335918700007	Medicine	Qjm-an International Journal of Medicine	1460-2725	2.461	1	0	Buddhist Tzu Chi General Hospital	FM	Buddhist Tzu Chi Gen Hosp	0	0		1	1	1																		1
			General & Internal
Cohen's h for detection of disease association with rare genetic variants	2014	343180000002	Biotechnology & Applied Microbiology	Bmc Genomics	1471-2164	4.041	0	1	Buddhist Tzu Chi General Hospital	Publ Hlth	Tzu Chi Univ	0	0		1	1	1
			Genetics & Heredity
Findings of 2731 suspected phthalate-tainted foodstuffs during the 2011 phthalates incident in Taiwan	2014	341062600004	Medicine	Journal of the Formosan Medical Association	0929-6646	1.695	0	1	Kaohsiung Medical University & Hospital	Publ Hlth	Kaohsiung Med Univ	0	0		1	1	1	1
			General & Internal
Increased detection rate of melamine-containing calcium urolithiasis by using matrix-assisted laser desorption/ionization time-of-flight mass spectrometry technique in clinical practice	2014	335613200048	Medical Laboratory Technology	Clinica Chimica Acta	0009-8981	2.764	0	1	Kaohsiung Medical University & Hospital	Publ Hlth	Kaohsiung Med Univ	0	0		1	1	1	1																									1
Prevalence and associated factors of sarcopenia and severe sarcopenia in older Taiwanese living in rural community: The Tianliao Old People study 04	2014	331085800009	Geriatrics & Gerontology	Geriatrics & Gerontology International	1444-1586	1.575	1	1	National Cheng Kung University & Hospital	FM	Natl Cheng Kung Univ Hosp	0	0		1	1																				1											1
			Gerontology
Consensus of Official Position of IOF/ISCD FRAX Initiatives in Asia-Pacific Region	2014	331598300025	Endocrinology & Metabolism	Journal of Clinical Densitometry	1094-6950	1.603	1	1	National Cheng Kung University & Hospital	FM	Natl Cheng Kung Univ Hosp	1	England	Europe	1	1					1					1							1	1	1	1											1
													Malaysia	Asia
													Japan	Asia
													Australia	Oceania
													Peoples R China	Asia
													Philippines	Asia
													Singapore	Asia
													South Korea	Asia
													Indonesia	Asia
													USA	North America
													Switzerland	Europe
Anti-anxiety drugs use and cardiovascular outcomes in patients with myocardial infarction: A national wide assessment	2014	342411000937	Peripheral Vascular Disease	Atherosclerosis	0021-9150	3.971	0	0	Far Eastern Memoral Hospital	CV	Natl Taiwan Univ	0	0		1	1	1		1	1																1
A retrospective analysis of the factors associated with hypercalcaemia in patients with advanced cancer	2014	340559800013	Oncology	European Journal of Cancer Care	0961-5423	1.762	1	0	Kaohsiung Medical University & Hospital	FM	Kaohsiung Med Univ Hosp	0	0		1	1	1																															1
			Health Care Sciences & Services
			Nursing
			Rehabilitation
Accurate method to estimate insulin resistance from multiple regression models using data of metabolic syndrome and oral glucose tolerance test	2014	335575500009	Endocrinology & Metabolism	Journal of Diabetes Investigation	2040-1116	1.496	0	0	Cardinal Tien Hospital	Meta	Shuang Ho Hosp	0	0		1	1													1				1			1
Vitamin D receptor variability and physical activity are jointly associated with low handgrip strength and osteoporosis in community-dwelling elderly people in Taiwan: the Taichung Community Health Study for Elders (TCHS-E)	2014	337034600011	Endocrinology & Metabolism	Osteoporosis International	0937-941X	4.165	0	1	China Medical University Hospital	Publ Hlth	China Med Univ	0	0		1	1	1		1	1	1
In Vivo and In Vitro Anti-Tumor Effects of Fungal Extracts	2014	334418200074	Chemistry	Molecules	1420-3049	2.095	1	1	National Cheng Kung University & Hospital	FM	Natl Cheng Kung Univ	0	0		1	1
			Organic
Epidemiology of sarcopenia among community-dwelling older adults in Taiwan: A pooled analysis for a broader adoption of sarcopenia assessments	2014	331085800007	Geriatrics & Gerontology	Geriatrics & Gerontology International	1444-1586	1.575	0	0	China Medical University Hospital	Publ Hlth	China Med Univ	0	0		1	1	1			1	1															1
			Gerontology
Impaired baroreflex sensitivity in subjects with impaired glucose tolerance, but not isolated impaired fasting glucose	2014	340507200003	Endocrinology & Metabolism	Acta Diabetologica	0940-5429	3.679	1	1	National Cheng Kung University & Hospital	FM	Natl Cheng Kung Univ Hosp	0	0		1	1			1
Patterns of Nonemergent Visits to Different Healthcare Facilities on the Same Day: A Nationwide Analysis in Taiwan	2014	335334800001	Multidisciplinary Sciences	Scientific World Journal	1537-744X	1.219	0	1	Taipei Veterans General Hospital	Hosp & Hlth Care	Natl Yang Ming Univ	1	Hungary	Europe	1	1	1
No Increased Risk of Herpes Zoster Found in Cirrhotic Patients: A Nationwide Population-Based Study in Taiwan	2014	334105000061	Multidisciplinary Sciences	Plos One	1932-6203	3.534	0	0	Kaohsiung Medical University & Hospital	Nephro	Kaohsiung Med Univ Hosp	0	0		1	1				1									1
Diagnostic accuracy of a single qualitative immunochemical fecal occult blood test coupled with physical measurements	2014	347276600002	Medicine	Chinese Medical Journal	0366-6999	1.016	1	1	Taipei City Hospital	FM	Taipei City Hosp	0	0		1	1	1
			General & Internal
Deep-Sea Water Containing Selenium Provides Intestinal Protection against Duodenal Ulcers through the Upregulation of Bcl-2 and Thioredoxin Reductase 1	2014	339635000002	Multidisciplinary Sciences	Plos One	1932-6203	3.534	0	0	National Taiwan University & Hospital	Internal medicine	Natl Yang Ming Univ	0	0		1	1																				1
Sialic Acid Rescues Repurified Lipopolysaccharide-Induced Acute Renal Failure via Inhibiting TLR4/PKC/gp91-Mediated Endoplasmic Reticulum Stress, Apoptosis, Autophagy, and Pyroptosis Signaling	2014	342990200020	Toxicology	Toxicological Sciences	1096-6080	4.478	1	0	National Taiwan University & Hospital	FM	Natl Taiwan Univ Hosp	0	0		1	1				1																1
Gastric Helicobacter pylori infection associated with risk of diabetes mellitus, but not prediabetes	2014	343991600011	Gastroenterology & Hepatology	Journal of Gastroenterology and Hepatology	0815-9319	3.627	1	1	National Cheng Kung University & Hospital	FM	Natl Cheng Kung Univ Hosp	0	0		0	0
Association between Sjogren's Syndrome and Respiratory Failure: Put Airway, Interstitia, and Vessels Close Together: A National Cohort Study	2014	343943100041	Multidisciplinary Sciences	Plos One	1932-6203	3.534	1	0	Chia Yi Christian Hospital	FM	Chia Yi Christian Hosp	0	0		1	1	1			1															1
A high-resolution computed tomography-based scoring system to differentiate the most infectious active pulmonary tuberculosis from community-acquired pneumonia in elderly and non-elderly patients	2014	341786000004	Radiology	European Radiology	0938-7994	4.338	0	0	Chia Yi Christian Hospital	Radiol	Chia Yi Christian Hosp	0	0		1	1																		1
			Nuclear Medicine & Medical Imaging
Nontuberculosis Mycobacterium Disease is a Risk Factor for Chronic Obstructive Pulmonary Disease: A Nationwide Cohort Study	2014	336025900008	Respiratory System	Lung	0341-2040	2.171	1	0	Chia Yi Christian Hospital	FM	Chia Yi Christian Hosp	0	0		1	1												1							1
Rheumatoid Arthritis Increases the Risk of Nontuberculosis Mycobacterial Disease and Active Pulmonary Tuberculosis	2014	343674800087	Multidisciplinary Sciences	Plos One	1932-6203	3.534	1	0	Chia Yi Christian Hospital	FM	Chia Yi Christian Hosp	0	0		1	1																			1	1
Risk factors of depression after prolonged low-dose rate environmental radiation exposure	2014	343001200004	Biology	International Journal of Radiation Biology	0955-3002	1.837	0	0	Taipei City Hospital	Environm & Occupat Hlth	Natl Yang Ming Univ	0	0		1	1	1	1	1				1													1
			Nuclear Science & Technology
			Radiology
			Nuclear Medicine & Medical Imaging
Prognostic determinants of community-acquired bloodstream infection in type 2 diabetic patients in ED	2014	346353000002	Emergency Medicine	American Journal of Emergency Medicine	0735-6757	1.152	0	0	Chang Gung Memorial Hospital	Emergency	Far Eastern Mem Hosp	1	Germany	Europe	1	1	1																			1	1
Value of high-sensitivity C-reactive protein assays in predicting atrial fibrillation recurrence: a systematic review and meta-analysis	2014	334459100082	Medicine	Bmj Open	2044-6055	2.063	0	0	Chang Gung Memorial Hospital	Emergency	Far Eastern Mem Hosp	1	USA	North America	1	1	1																				1
			General & Internal
Influenza vaccination coverage and factors affecting adherence to influenza vaccination among patients with diabetes in Taiwan	2014	336655000033	Biotechnology & Applied Microbiology	Human Vaccines & Immunotherapeutics	2164-5515	2.131	0	0	National Cheng Kung University & Hospital	Chem Engn	Tatung Univ	0	0		1	1	1														1
			immunology
Abdominal obesity validates the association between elevated alanine aminotransferase and newly diagnosed diabetes mellitus	2014	332189400009	Endocrinology & Metabolism	Endocrine Journal	0918-8959	2.019	1	1	Chang Gung Memorial Hospital	FM	Chiayi Chang Gung Mem Hosp	0	0		1	1	1																	1
Utilization and patterns of community healthcare services for senior residents in long-term care facilities in Taiwan: A nationwide study	2013	314907800008	Medicine, General & Internal	Journal of the Chinese Medical Association	1726-4901	0.889	1	1	Taipei Veterans General Hospital	FM	Minist Hlth & Welf, Taipei Hosp	0	0		1	1				1														1
									Minist Hlth & Welf, Taipei Hosp
Survival analysis in systemic lupus erythematosus patients on maintenance dialysis: a nationwide population-based study in Taiwan	2013	312640300022	Rheumatology	Rheumatology	1462-0324	4.435	0	0	Taipei Veterans General Hospital	AIR	Taipei Vet Gen Hosp	0	0		1	1	1									1			1								1
The Influence of Electro-Acupuncture Stimulation to Female Constipation Patients	2013	317134200006	Medicine, General & Internal	American Journal of Chinese Medicine	0192-415X	2.625	0	0	National Taiwan University & Hospital	Elect Engn	Natl Yunlin Univ Sci & Technol	0	0		1	1
			Integrative & Complementary Medicine
Risk of developing diabetes mellitus and hyperlipidemia among patients with bipolar disorder, major depressive disorder, and schizophrenia: A 10-year nationwide population-based prospective cohort study	2013	322762600008	Clinical Neurology	Journal of Affective Disorders	0165-0327	3.705	0	0	Taipei Veterans General Hospital	Psychi	Taipei Vet Gen Hosp	0	0		0	1							1
A 12-Year Ecological Study of Hip Fracture Rates among Older Taiwanese Adults	2013	325825400001	Endocrinology & Metabolism	Calcified Tissue International	0171-967X	2.748	0	0	National Taiwan University & Hospital	Geriatr & Gerontol	Natl Taiwan Univ Hosp	0	0		1	1			1		1												1			1											1
National Antiviral Treatment Program and the Incidence of Hepatocellular Carcinoma and Associated Mortality in Taiwan A Preliminary Report	2013	324751000009	Health Care Sciences & Services	Medical Care	0025-7079	2.941	0	0	Taipei Medical University & Hospital	Publ Hlth	Natl Taiwan Univ Hosp	0	0		1	1	1							1												1
			Health Policy & Services
			Public, Environmental & Occupational Health
Comparison of three BIA muscle indices for sarcopenia screening in old adults	2013	322099800003	Geriatrics & Gerontology	European Geriatric Medicine	1878-7649	0.552	0	1	National Taiwan University & Hospital	Geriatr & Gerontol	Natl Hlth Res Inst	0	0		1	1	1		1		1		1
The interplay between inflammation, physical activity and metabolic syndrome in a remote male geriatric community in Southern Taiwan: the Tianliao Old People (TOP) study 03	2013	326632800001	Endocrinology & Metabolism	Diabetology & Metabolic Syndrome	1758-5996	2.5	0	0	National Cheng Kung University & Hospital	CV	Natl Cheng Kung Univ	0	0		0	1								1
Inverse Relationship Between Central Obesity and Osteoporosis in Osteoporotic Drug Naive Elderly Females: The Tianliao Old People (TOP) Study	2013	319032700015	Endocrinology & Metabolism	Journal of Clinical Densitometry	1094-6950	1.603	1	1	National Cheng Kung University & Hospital	FM	Natl Cheng Kung Univ Hosp	0	0		1	1	1																	1
Oxaliplatin-induced acquired long QT syndrome with torsades de pointes and myocardial injury in a patient with dilated cardiomyopathy and rectal cancer	2013	323359500010	Medicine, General & Internal	Journal of the Chinese Medical Association	1726-4901	0.889	0	0	Cheng Ching Gen Hosp	CV	Chia Yi Christian Hosp	0	0		1	1									1							1				1
Occupational Noise Exposure and Incident Hypertension in Men: A Prospective Cohort Study	2013	317435600011	Public, Environmental & Occupational Health	American Journal of Epidemiology	0002-9262	4.975	0	0	China Medical University Hospital	Publ Hlth	China Med Univ Hosp	1	Netherlands	Europe	1	1	1
The association between hyperuricemia, left atrial size and new-onset atrial fibrillation	2013	326219600143	Cardiac & Cardiovascular Systems	International Journal of Cardiology	0167-5273	6.175	0	0	Taipei Veterans General Hospital	CV	Taipei Vet Gen Hosp	0	0		1	1								1						1
CHADS(2) score and risk of new-onset atrial fibrillation: A nationwide cohort study in Taiwan	2013	325412800130	Cardiac & Cardiovascular Systems	International Journal of Cardiology	0167-5273	6.175	0	0	Taipei Veterans General Hospital	CV	Taipei Vet Gen Hosp	0	0		1	1	1							1						1		1
The association between the use of non-steroidal anti-inflammatory drugs and atrial fibrillation: A nationwide case-control study	2013	325409800061	Cardiac & Cardiovascular Systems	International Journal of Cardiology	0167-5273	6.175	0	0	Taipei Veterans General Hospital	CV	Taipei Vet Gen Hosp	0	0		1	1								1						1		1
Impact of timing of surgery on outcome of Vibrio vulnificus-related necrotizing fasciitis	2013	321510100006	Surgery	American Journal of Surgery	0002-9610	2.406	0	0	Chung Shan Medical University & Hospital	Surgery	Chung Shan Med Univ Hosp	0	0		1	1																				1		1	1
									Minist Hlth & Welf, Taichung Hospital
Circulating biomarkers of collagen type I metabolism mark the right ventricular fibrosis and adverse markers of clinical outcome in adults with repaired tetralogy of Fallot	2013	324478400104	Cardiac & Cardiovascular Systems	International Journal of Cardiology	0167-5273	6.175	0	0	National Taiwan University & Hospital	Pediatric	Natl Taiwan Univ Hosp	0	0		0	1																		1		1
Predicting dengue outbreaks using approximate entropy algorithm and pattern recognition	2013	320028900009	Infectious Diseases	Journal of Infection	0163-4453	4.017	1	1	St Martin de Porres Hosp	FM	St Martin de Porres Hosp	0	0		1	1			1
The Association of Prolonged QT Interval on Electrocardiography and Chronic Lead Exposure	2013	330447300005	Public, Environmental & Occupational Health	Journal of Occupational and Environmental Medicine	1076-2752	1.797	1	0	Armed Forces General Hospital	FM	Zuoying Armed Gen Hosp	0	0		1	1	1	1																		1
Surgeon Elective Abdominal Aortic Aneurysm Repair Volume and Outcomes of Ruptured Abdominal Aortic Aneurysm Repair: A 12-year Nationwide Study	2013	323672300017	Surgery	World Journal of Surgery	0364-2313	2.348	0	0	Taipei Veterans General Hospital	Radio	Minist Hlth & Welf, Taipei Hosp	0	0		1	1	1								1									1
Diabetes mellitus, metabolic syndrome and obesity are not significant risk factors for hepatocellular carcinoma in an HBV- and HCV-endemic area of Southern Taiwan	2013	323359400007	Medicine, Research & Experimental	Kaohsiung Journal of Medical Sciences	1607-551X	0.805	1	0	Chang Gung Memorial Hospital	FM	Kaohsiung Chang Gung Mem Hosp	0	0		1	1															1
Association between a history of periodontitis and the risk of rheumatoid arthritis: a nationwide, population-based, case-control study	2013	319737000022	Rheumatology	Annals of the Rheumatic Diseases	0003-4967	9.27	0	0	Taipei Veterans General Hospital	AIR	Taichung Vet Gen Hosp	0	0		1	1	1		1							1
Asthma and attention-deficit/hyperactivity disorder: a nationwide population-based prospective cohort study	2013	325621700006	Psychiatry	Journal of Child Psychology and Psychiatry	0021-9630	5.669	0	0	Taipei Veterans General Hospital	Psychi	Taipei Vet Gen Hosp	0	0		0	1							1
Higher risk of developing mood disorders among adolescents with comorbidity of attention deficit hyperactivity disorder and disruptive behavior disorder: A nationwide prospective study	2013	321073500004	Psychiatry	Journal of Psychiatric Research	0022-3956	4.092	0	0	Taipei Veterans General Hospital	Psychi	Taipei Vet Gen Hosp	0	0		0	1							1
Association between psychiatric disorders and iron deficiency anemia among children and adolescents: a nationwide population-based study	2013	320126400001	Psychiatry	Bmc Psychiatry	1471-244X	2.237	0	0	Taipei Veterans General Hospital	Psychi	Taipei Vet Gen Hosp	0	0		0	1							1
Comorbidity of allergic and autoimmune diseases in patients with autism spectrum disorder: A nationwide population-based study	2013	318194700001	Education, Special	Research in Autism Spectrum Disorders	1750-9467	2.378	0	0	Taipei Veterans General Hospital	Psychi	Taipei Vet Gen Hosp	0	0		0	1							1
			Psychology, Developmental
			Psychiatry; Rehabilitation
Symptomatic Menopausal Transition Increases the Risk of New-Onset Depressive Disorder in Later Life: A Nationwide Prospective Cohort Study in Taiwan	2013	317480700068	Multidisciplinary Sciences	PLoS One	1932-6203	3.534	0	0	Taipei Veterans General Hospital	Psychi	Taipei Vet Gen Hosp	0	0		0	1
A telehealth service model for the treatment of hypertension	2013	324161900002	Health Care Sciences & Services	Journal of Telemedicine and Telecare	1357-633X	1.736	1	0	Taipei City Hospital	FM	Taipei City Hosp	1	Japan	Asia	1	1								1												1
Increased cancer mortality in Taiwanese inter-island migrants	2013	323554000008	Health Care Sciences & Services	Geospatial Health	1827-1987	1	1	0	National Taiwan University & Hospital	FM	Natl Taiwan Univ	0	0		0	1	1
			Public, Environmental & Occupational Health
Updated diagnosis and treatment of childhood tuberculosis	2013	314680200002	Pediatrics	World Journal of Pediatrics	1708-8569	1.048	1	0	Da Chien Gen Hosp	FM	Da Chien Gen Hosp	0	0		1	1	1
Factors affecting the use of anti-amoebiasis protective measures among Taiwan immigrants returning to amoebiasis-endemic regions	2013	328636700011	Public, Environmental & Occupational Health	Public Health	0033-3506	1.475	1	0	Da Chien Gen Hosp	FM	Da Chien Gen Hosp	0	0		1	1	1	1										1
Dental scaling and atrial fibrillation: A nationwide cohort study	2013	326184400093	Cardiac & Cardiovascular Systems	International Journal of Cardiology	0167-5273	6.175	0	0	Taipei Veterans General Hospital	Infection	Taipei Vet Gen Hosp	0	0		1	1	1							1						1		1				1
Dental Scaling and Risk Reduction in Infective Endocarditis: A Nationwide Population-Based Case-Control Study	2013	318166500007	Cardiac & Cardiovascular Systems	Canadian Journal of Cardiology	0828-282X	3.94	0	0	Taipei Veterans General Hospital	Infection	Taipei Vet Gen Hosp	0	0		1	1	1							1						1		1				1
Use of Thiazolidinediones and the Risk of Colorectal Cancer in Patients With Diabetes A nationwide, population-based, case-control study	2013	314467100040	Endocrinology & Metabolism	Diabetes Care	0149-5992	8.57	1	0	Cathay General Hospital	FM	Hsinchu Cathay Gen Hosp	0	0		1	1	1	1																			1
Rural and Urban Married Asian Immigrants in Taiwan: Determinants of their Physical and Mental Health	2013	326888100005	Public	Journal of Immigrant and Minority Health	1557-1912	1.264	0	0	China Medical University Hospital	Pediatrics	China Med Univ Hosp	0	0		0	1	1				1
			Environmental & Occupational Health
The first two lines of chemotherapy for anthracycline-naive metastatic breast cancer: A comparative study of the efficacy of anthracyclines and non-anthracyclines	2013	326677500023	Oncology	Breast	0960-9776	2.581	0	0	Taipei Veterans General Hospital	Oncology	Natl Taiwan Univ Hosp	0	0		1	1																1				1			1
			Obstetrics & Gynecology
Epidemiology of adrenal insufficiency: A nationwide study of hospitalizations in Taiwan from 1996 to 2008	2013	317945700005	Medicine	Journal of the Chinese Medical Association	1726-4901	0.889	1	1	Taipei Veterans General Hospital	FM	Taipei Vet Gen Hosp	1	Germany	Europe	1	1	1		1	1
			General & Internal
Increased Risk of Sexual Dysfunction in Male Patients with Psoriasis: A Nationwide Population-Based Follow-Up Study	2013	318237900003	Urology & Nephrology	Journal of Sexual Medicine	1743-6095	3.15	0	0	Taipei Veterans General Hospital	Derma	Taipei Vet Gen Hosp	0	0		1	1	1
Diabetes and risk of subsequent gastric cancer: a population-based cohort study in Taiwan	2013	321911100017	Oncology	Gastric Cancer	1436-3291	4.828	1	0	China Medical University Hospital	FM	China Med Univ Hosp	0	0		1	1	1
			Gastroenterology & Hepatology
Acute cholecystitis in end-stage renal disease patients: A nation-wide longitudinal study	2013	317889200012	Gastroenterology & Hepatology	Digestive and Liver Disease	1590-8658	2.889	0	0	Taipei Veterans General Hospital	Nephro	Taipei Vet Gen Hosp	0	0		1	1													1																				1
Healthcare professionals' priorities for child abuse educational programming: A Delphi study	2013	313772400023	Family Studies	Children and Youth Services Review	0190-7409	1.046	0	0	Yuans Gen Hosp	Nursing	Natl Cheng Kung Univ Hosp	0	0		1	1
			social work
Factors associated with premenstrual syndrome-A survey of new female university students	2013	316930300007	Medicine	Kaohsiung Journal of Medical Sciences	1607-551X	0.805	0	1	National Cheng Kung University & Hospital	Psychi	Natl Cheng Kung Univ Hosp	0	0		1	1	1						1
			Research & Experimental
Evaluation of Inpatient Multidisciplinary Palliative Care Unit on Terminally Ill Cancer Patients from Providers Perspectives: A Propensity Score Analysis	2013	314704200009	Oncology	Japanese Journal of Clinical Oncology	0368-2811	1.747	1	1	National Taiwan University & Hospital	FM	Natl Taiwan Univ	1	USA	North America	1	1	1
Comparison of Proxy Ratings of Main Family Caregivers and Physicians on the Quality of Dying of Terminally Ill Cancer Patients	2013	322568600005	Oncology	Japanese Journal of Clinical Oncology	0368-2811	1.747	1	1	National Taiwan University & Hospital	FM	Natl Taiwan Univ Hosp	1	USA	North America	1	1	1			1
A nationwide population study of trazodone use in urology patients	2013	323359500005	Medicine, General & Internal	Journal of the Chinese Medical Association	1726-4901	0.889	0	0	Taipei Veterans General Hospital	GU	Taipei Vet Gen Hosp	0	0		0	1																											1
Herpes simplex virus infection and risk of atrial fibrillation: A nationwide study	2013	316599200014	Cardiac & Cardiovascular Systems	International Journal of Cardiology	0167-5273	6.175	0	0	Taipei Veterans General Hospital	CV	Taipei Vet Gen Hosp	1	Germany	Europe	1	1								1
Serum Adiponectin Levels are Associated with Hepatitis B Viral Load in Overweight to Obese Hepatitis B Virus Carriers	2013	322087300012	Endocrinology & Metabolism	Obesity	1930-7381	4.389	1	1	National Taiwan University & Hospital	FM	Natl Taiwan Univ Hosp	0	0		0	1															1
			Nutrition & Dietetics
Hip Fracture and Risk of Acute Myocardial Infarction: A Nationwide Study	2013	315105600019	Endocrinology & Metabolism	Journal of Bone and Mineral Research	0884-0431	6.589	0	0	Taipei Veterans General Hospital	CV	Zhudong Vet Hosp	0	0		1	1	1		1		1			1								1
Primary Sjogren's Syndrome and the Risk of Acute Myocardial Infarction: A Nationwide Study	2013	316304100003	Cardiac & Cardiovascular Systems	Acta Cardiologica Sinica	1011-6842	0.845	0	0	Taipei Veterans General Hospital	CV	Zhudong Vet Hosp	0	0		1	1	1				1			1								1
Systemic sclerosis and risk of ischaemic stroke: a nationwide cohort study	2013	312640300021	Rheumatology	Rheumatology	1462-0324	4.435	0	0	Taipei Veterans General Hospital	CV	Zhudong Vet Hosp	0	0		1	1			1					1								1
Association between obesity, hypertriglyceridemia and low hepatitis B viral load	2013	316931400012	Endocrinology & Metabolism	International Journal of Obesity	0307-0565	5.386	1	0	National Taiwan University & Hospital	FM	Natl Taiwan Univ Hosp	1	USA	North America	1	1	1														1
			Nutrition & Dietetics
Predicting 7-Day Survival Using Heart Rate Variability in Hospice Patients with Non-Lung Cancers	2013	325211000127	Multidisciplinary Sciences	PLoS One	1932-6203	3.534	1	0	Buddhist Tzu Chi General Hospital	FM	Buddhist Dalin Tzu Chi Gen Hosp	1	Canada	North America	1	1	1										1
Reduced Risk for Metabolic Syndrome and Insulin Resistance Associated with Ovo-Lacto-Vegetarian Behavior in Female Buddhists: A Case-Control Study	2013	326473200074	Multidisciplinary Sciences	PLoS One	1932-6203	3.534	1	0	Buddhist Tzu Chi General Hospital	FM	Buddhist Dalin Tzu Chi Gen Hosp	0	0		0	1	1																			1
Social Participation and Life Expectancy-The Case of Older Adults in Taiwan from 1996 to 2003	2013	321406900007	Geriatrics & Gerontology	International Journal of Gerontology	1873-9598	0.473	0	1	Minist Hlth & Welf, Taichung Hospital	Nursing	Chung Shan Med Univ	0	0		1	1
Folic acid supplementation in end-stage renal disease patients reduces total mortality rate	2013	331853800017	Urology & Nephrology	Journal of Nephrology	1121-8428	1.996	0	0	Taipei Veterans General Hospital	Pharm	Taipei Med Univ Hosp	0	0		1	1													1
Is It Appropriate To Withdraw Antibiotics in Terminal Patients with Cancer with Infection?	2013	326884800020	Health Care Sciences & Services	Journal of Palliative Medicine	1096-6218	2.063	0	1	National Taiwan University & Hospital	Health Center	Natl Taiwan Univ Hosp	0	0		0	1
Overweight Associated with Increased Risk of Erosive Esophagitis in a Non-Obese Taiwanese Population	2013	326499300015	Multidisciplinary Sciences	PLoS One	1932-6203	3.534	1	1	Madou Sin Lau Hosp	FM	Madou Sin Lau Hosp	0	0		1	0
									National Cheng Kung University & Hospital
Increased Risk of Gastrointestinal Malignancy in Patients with Diabetes Mellitus and Correlations with Anti-Diabetes Drugs: A Nationwide Population-based Study in Taiwan	2013	320505500001	Medicine	Internal Medicine	0918-2918	0.967	0	0	Taipei Veterans General Hospital	CV	Taipei Vet Gen Hosp	0	0		0	1				1				1
			General & Internal
BMI Change Patterns and Disability Development of Middle-aged Adults with Diabetes: A Dual Trajectory Modeling Approach	2013	323254700014	Health Care Sciences & Services	Journal of General Internal Medicine	0884-8734	3.423	0	0	National Cheng Kung University & Hospital	Geronto	Natl Cheng Kung Univ	1	USA	North America	1	1				1													1
			Medicine
			General & Internal
Rhodiola crenulata extract for prevention of acute mountain sickness: a randomized, double-blind, placebo-controlled, crossover trial	2013	328370300002	Integrative & Complementary Medicine	Bmc Complementary and Alternative Medicine	1472-6882	1.877	0	0	Chang Gung Memorial Hospital	Emergency	Chang Gung Mem Hosp	0	0		1	1	1																			1	1
Disparity of physician specialties in the management of chronic heart failure: trend analysis in Taiwan, 2000-2010	2013	323990300008	Pharmacology & Pharmacy	International Journal of Clinical Pharmacology and Therapeutics	0946-1965	1.044	0	0	Taipei Veterans General Hospital	Dept Crit Care Med	Taipei Vet Gen Hosp	0	0		1	1			1	1																1		1
Association between Physician Specialty and Risk of Prescribing Inappropriate Pill Splitting	2013	323369700138	Multidisciplinary Sciences	PLoS One	1932-6203	3.534	0	0	Taipei Veterans General Hospital	Pharm	Taipei Vet Gen Hosp	0	0		1	1			1	1																1		1
Dosing variability in prescriptions of acetaminophen to children: comparisons between pediatricians, family physicians and otolaryngologists	2013	318614300001	Pediatrics	Bmc Pediatrics	1471-2431	1.918	0	0	Taipei Veterans General Hospital	Pharm	Taipei Vet Gen Hosp	0	0		1	1				1																	1	1
Migraine is a risk factor for sudden sensorineural hearing loss: A nationwide population-based study	2013	312550000002	Clinical Neurology	Cephalalgia	0333-1024	4.121	0	0	Taipei Veterans General Hospital	Otorhinolaryngol	Taipei Vet Gen Hosp	0	0		1	1	1										1					1				1
			Neurosciences
Increased Risk of Acute Myocardial Infarction in Systemic Sclerosis: A Nationwide Population-based Study	2013	326050300030	Medicine	American Journal of Medicine	0002-9343	5.302	0	0	Taipei Veterans General Hospital	Derma	Taipei Vet Gen Hosp	0	0		1	1	1															1				1
			General & Internal
Homocysteine and C-Reactive Protein as Useful Surrogate Markers for Evaluating CKD Risk in Adults	2013	328196500018	Physiology	Kidney & Blood Pressure Research	1420-4096	1.82	0	0	Chang Gung Memorial Hospital	Emergency	Chang Gung Mem Hosp Linkou	0	0		1	1																					1
			Urology & Nephrology
			Peripheral Vascular Disease
The effect of cigarette smoke and arsenic exposure on urothelial carcinoma risk is modified by glutathione S-transferase M1 gene null genotype	2013	313758200009	Pharmacology & Pharmacy	Toxicology and Applied Pharmacology	0041-008X	3.63	0	0	Taipei Medical University & Hospital	Publ Hlth	China Med Univ Hosp	0	0		1	1	1																										1
			Toxicology
4-(Methylnitrosamino)-1-(3-pyridyl)-1-butanone (NNK) metabolism-related enzymes gene polymorphisms, NNK metabolites levels and urothelial carcinoma	2013	312532400003	Toxicology	Toxicology Letters	0378-4274	3.355	0	0	Taipei Medical University & Hospital	Publ Hlth	China Med Univ Hosp	0	0		1	1	1	1																									1
Statins of high versus low cholesterol-lowering efficacy and the development of severe renal failure	2013	319875400004	Pharmacology & Pharmacy	Pharmacoepidemiology and Drug Safety	1053-8569	3.172	1	0	Cathay General Hospital	FM	Cathay Gen Hosp	0	0		1	1	1							1												1
A stabilization device to improve the quality of cardiopulmonary resuscitation during ambulance transportation: A randomized crossover trial	2013	328654800027	Critical Care Medicine	Resuscitation	0300-9572	3.96	0	0	Chi Mei Medical Center	Emergency	Chi Mei Med Ctr	0	0		1	1	1	1																			1
			Emergency Medicine
Gamma-glutamyl transpeptidase and the metabolic syndrome in a Taiwanese aboriginal population	2013	325944500004	Endocrinology & Metabolism	International Journal of Diabetes in Developing Countries	0973-3930	0.373	1	1	Chang Gung Memorial Hospital	FM	Chang Gung Mem Hosp	0	0		0	0
Effects of commercial citrate-containing juices on urolithiasis in a Drosophila model	2013	324305900004	Medicine, Research & Experimental	Kaohsiung Journal of Medical Sciences	1607-551X	0.805	0	0	China Medical University Hospital	中醫	China Med Univ Hosp	0	0		1	1																											1			1
Electroacupuncture and Acupuncture Promote the Rat's Transected Median Nerve Regeneration	2013	316480500001	Integrative & Complementary Medicine	Evidence-Based Complementary and Alternative Medicine	1741-427X	2.175	0	0	China Medical University Hospital	中醫	China Med Univ Hosp	0	0		0	1			1															1
Elevated fasting glucose levels within normal range are associated with an increased risk of metabolic syndrome in older women	2013	320648700011	Medicine, General & Internal	European Journal of Internal Medicine	0953-6205	2.3	0	0	Cardinal Tien Hospital	META	Triserv Gen Hosp	0	0		1	1																	1			1
Uninterrupted Wireless Long-Term Recording of Sleep Patterns and Autonomic Function in Freely Moving Rats	2013	315947700010	Engineering, Biomedical	Journal of Medical and Biological Engineering	1609-0985	1.076	0	0	Taipei City Hospital	neuro	Natl Yang Ming Univ	0	0		1	1											1
Angiotensin-Receptor Blockers and Risk of Alzheimer's Disease in Hypertension Population - A Nationwide Cohort Study	2013	314263000023	Cardiac & Cardiovascular Systems	Circulation Journal	1346-9843	3.605	0	0	Taipei Veterans General Hospital	CV	Taipei Vet Gen Hosp	0	0		1	1			1					1
Iron deficiency is associated with increased risk for cardiovascular disease and all-cause mortality in the elderly living in long-term care facilities	2013	318189600007	Nutrition & Dietetics	Nutrition	0899-9007	3.046	1	1	China Medical University Hospital	FM	China Med Univ Hosp	0	0		1	1			1	1
Central obesity in males affected by a dyslipidemia-associated genetic polymorphism on APOA1/C3/A4/A5 gene cluster	2013	320921900001	Endocrinology & Metabolism	Nutrition & Diabetes	2044-4052	1.517	0	0	National Cheng Kung University & Hospital	Lab Sci & Biotechnol	Natl Cheng Kung Univ	0	0		1	1	1													1									1
			Nutrition & Dietetics
The dyslipidemia-associated SNP on the APOA1/C3/A5 gene cluster predicts post-surgery poor outcome in Taiwanese breast cancer patients: a 10-year follow-up study	2013	321568500001	Oncology	Bmc Cancer	1471-2407	3.319	0	0	National Cheng Kung University & Hospital	Lab Sci & Biotechnol	Natl Cheng Kung Univ	0	0		1	1														1									1
Auditory efferent dysfunction in normal-hearing chronic idiopathic tinnitus	2013	322208900004	Otorhinolaryngology	B-Ent	0001-6497	0.377	0	0	National Taiwan University & Hospital	ENT	Cathay Gen Hosp	0	0		1	1	1
Alcohol consumption is inversely associated with stage 3 chronic kidney disease in middle-aged Taiwanese men	2013	327485900001	Urology & Nephrology	Bmc Nephrology	1471-2369	1.52	0	0	Chia Yi Christian Hospital	Hlth Serv Adm	China Med Univ	0	0		1	1	1			1									1
The risk of cancer among patients with sleep disturbance: a nationwide retrospective study in Taiwan	2013	327926100003	Public, Environmental & Occupational Health	Annals of Epidemiology	1047-2797	2.145	0	0	Taipei Veterans General Hospital	Psychi	Kaohsiung Vet Gen Vet Hosp	0	0		1	1	1						1								1	1		1
Delayed Onset Urticaria in Depressive Patients with Bupropion Prescription: A Nationwide Population-Based Study	2013	327143800117	Multidisciplinary Sciences	PLoS One	1932-6203	3.534	0	0	Taipei Veterans General Hospital	Psychi	Kaohsiung Vet Gen Vet Hosp	0	0		1	1	1						1			1		1				1
Hyperthyroidism and Risk for Bipolar Disorders: A Nationwide Population-Based Study	2013	323880200065	Multidisciplinary Sciences	PLoS One	1932-6203	3.534	0	0	Taipei Veterans General Hospital	Psychi	Yuli Vet Hosp	0	0		1	1	1						1									1
Rosuvastatin-regulated post-translational phosphoproteome in human umbilical vein endothelial cells	2013	320598100001	Medicine, Research & Experimental	Kaohsiung Journal of Medical Sciences	1607-551X	0.805	0	0	Taipei Medical University & Hospital	Biomed Sci	Kaohsiung Med Univ	0	0		1	1			1										1
The beneficial effects of statins in patients undergoing hemodialysis	2013	326219600164	Cardiac & Cardiovascular Systems	International Journal of Cardiology	0167-5273	6.175	0	0	Taipei Veterans General Hospital	Res & Educ	Taipei Vet Gen Hosp	0	0		1	1								1
Herpes simplex virus infection and erectile dysfunction: a nationwide population-based study	2013	315463000008	Andrology	Andrology	2047-2919	NA	0	0	Taipei Veterans General Hospital	Res & Educ	Taipei Vet Gen Hosp	0	0		1	1				1				1
Predicting the hyperglycemic crisis death (PHD) score: a new decision rule for emergency and critical care	2013	318965100014	Emergency Medicine	American Journal of Emergency Medicine	0735-6757	1.152	0	1	Chi Mei Medical Center	Emergency	Chi Mei Med Ctr	0	0		1	1		1		1																	1
Nicotinuric Acid A potential marker of metabolic syndrome through a metabolomics-based approach	2013	321472600045	Endocrinology & Metabolism	Diabetes Care	0149-5992	8.57	0	0	St Marys Hosp	FM	St Marys Hosp	0	0		1	1			1					1
On the Trail of Preventing Meningococcal Disease: A Survey of Students Planning to Travel to the United States	2013	328860300008	Medicine, General & Internal	Journal of Travel Medicine	1195-1982	1.525	1	1	Cardinal Tien Hospital	FM	Cardinal Tien Hosp	0	0		1	1
									National Taiwan University & Hospital
Concomitant Horner and Harlequin Syndromes after Inferior Alveolar Nerve Block Anesthesia	2013	327916700036	Dentistry, Oral Surgery & Medicine	Journal of Endodontics	0099-2399	2.788	0	0	Tri-Service General Hospital	Dent	Natl Def Med Ctr	0	0		1	1
The relationship between impaired fasting glucose and self-reported sleep quality in a Chinese population	2013	316229400007	Endocrinology & Metabolism	Clinical Endocrinology	0300-0664	3.353	0	1	National Cheng Kung University & Hospital	META	Natl Cheng Kung Univ Hosp	0	0		1	1																	1
The Association Between Self-Reported Sleep Quality and Overweight in a Chinese Population	2013	322087600034	Endocrinology & Metabolism	Obesity	1930-7381	4.389	0	1	National Cheng Kung University & Hospital	META	Natl Cheng Kung Univ Hosp	0	0		1	1																	1
			Nutrition & Dietetics
The Association between Self-Reported Sleep Quality and Metabolic Syndrome	2013	314759400146	Multidisciplinary Sciences	PLoS One	1932-6203	3.534	0	1	National Cheng Kung University & Hospital	META	Natl Cheng Kung Univ Hosp	0	0		1	1																	1			1
Prevalence and related factors of non-alcoholic fatty liver disease among the elderly in Taiwan	2013	329561400003	Geriatrics & Gerontology	European Geriatric Medicine	1878-7649	0.552	0	0	China Medical University Hospital	Emergency	Nantou Hosp	0	0		1	1	1																				1		1
Synergistic interaction of benign prostatic hyperplasia and prostatitis on prostate cancer risk	2013	319125300003	Oncology	British Journal of Cancer	0007-0920	4.817	0	0	China Medical University Hospital	Emergency	Nantou Hosp	0	0		1	1	1																				1						1
Incidence and risk of mood disorders in patients with breast cancers in Taiwan: a nationwide population-based study	2013	325150400011	Oncology	Psycho-Oncology	1057-9249	4.044	0	0	Taipei Veterans General Hospital	HEMA	Taipei Vet Gen Hosp	0	0		1	1	1						1									1
			Psychology
			Social Sciences, Biomedical
Association of Androgen with Skeletal Muscle Mass and Muscle Function Among Men and Women Aged 50 Years and Older in Taiwan: Results from the I-Lan Longitudinal Aging Study	2013	328558300003	Geriatrics & Gerontology	Rejuvenation Research	1549-1684	3.931	0	0	Taipei Veterans General Hospital	Geriatr & Gerontol	Taipei Vet Gen Hosp	0	0		0	1	1				1
Atopic Diathesis in Patients with Kawasaki Disease	2013	323985300042	Pediatrics	Journal of Pediatrics	0022-3476	3.736	0	0	Taipei Veterans General Hospital	Derma	Taipei Med Univ	0	0		1	1	1
Description and Prediction of the Development of Metabolic Syndrome: A Longitudinal Analysis Using a Markov Model Approach	2013	322342800133	Multidisciplinary Sciences	PLoS One	1932-6203	3.534	1	1	Mackay Memoral Hospital	FM	Mackay Mem Hosp	0	0		1	1	1
Predictors of In-hospital Mortality in Oldest-Old Patients in Taiwan	2013	317945800005	Geriatrics & Gerontology	International Journal of Gerontology	1873-9598	0.473	1	1	Mackay Memoral Hospital	FM	Mackay Mem Hosp	0	0		1	1																				1
Hospice Offers More Palliative Care but Costs Less Than Usual Care for Terminal Geriatric Hepatocellular Carcinoma Patients: A Nationwide Study	2013	320768900017	Health Care Sciences & Services	Journal of Palliative Medicine	1096-6218	2.063	1	0	Taipei Veterans General Hospital	FM	Taipei Vet Gen Hosp	0	0		1	1	1			1											1
									Minist Hlth & Welf, Taipei Hosp
The utilization of hospice care among patients with motor neuron diseases: The experience in Taiwan from 2005 to 2010	2013	322687900007	Medicine, General & Internal	Journal of the Chinese Medical Association	1726-4901	0.889	1	1	National Yang Ming University & Hospital	FM	Natl Yang Ming Univ Hosp	0	0		1	1											1
									Taipei Veterans General Hospital
Does the Awareness of Terminal Illness Influence Cancer Patients Psycho-spiritual State, and Their DNR Signing: A Survey in Taiwan	2013	323952100008	Oncology	Japanese Journal of Clinical Oncology	0368-2811	1.747	0	0	National Taiwan University & Hospital	Nursing	Univ Melbourne	1	Australia	Oceania	1	1
The influence of sex on cognitive insight and neurocognitive functioning in schizophrenia	2013	320297400026	Clinical Neurology	Progress in Neuro-Psychopharmacology & Biological Psychiatry	0278-5846	4.025	0	0	Tri-Service General Hospital	Psychi	Trserv Gen Hosp	0	0		1	1	1						1
			Neurosciences
			Pharmacology & Pharmacy
			Psychiatry
Inverse association between body mass index and chronic kidney disease in older diabetic adults	2013	318664700004	Public, Environmental & Occupational Health	Annals of Epidemiology	1047-2797	2.145	1	1	Shin Kong Wu Ho Su Mem Hosp	FM	Shin Kong Wu Ho Su Mem Hosp	0	0		1	0
The Official Positions of the International Society for Clinical Densitometry: Indications of Use and Reporting of DXA for Body Composition	2013	326851500019	Endocrinology & Metabolism	Journal of Clinical Densitometry	1094-6950	1.603	0	0	National Cheng Kung University & Hospital	NA	Univ British Columbia	1	Canada	North America	1	1
													Brazil	South America
													USA	North America
Immunogenicity, reactogenicity and safety of an inactivated quadrivalent influenza vaccine candidate versus inactivated trivalent influenza vaccine: a phase III, randomized trial in adults aged >= 18 years	2013	323067600001	Infectious Diseases	Bmc Infectious Diseases	1471-2334	2.561	0	0	China Medical University Hospital	NA	Univ Med, Zentrum Kinder & Jugendmed	1	Germany	Europe	1	1	1																			1
													USA	North America
													Spain	Europe
													Belgium	Europe
Short Duration of Sleep Is Associated with Hyperleptinemia in Taiwanese Adults	2013	325759400010	Clinical Neurology	Journal of Clinical Sleep Medicine	1550-9389	2.826	0	1	Buddhist Tzu Chi General Hospital	Med Res	Buddhist Dalin Tzu Chi Hosp	1	Canada	North America	1	1	1									1
Incidence and outcome of newly-diagnosed tuberculosis in schizophrenics: a 12-year, nationwide, retrospective longitudinal study	2013	322531000001	Infectious Diseases	Bmc Infectious Diseases	1471-2334	2.561	0	0	Taipei Veterans General Hospital	Infection	Natl Hlth Res Inst	0	0		1	1	1						1						1	1		1
Association between tuberculosis infections and non-pulmonary malignancies: a nationwide population-based study	2013	321702400029	Oncology	British Journal of Cancer	0007-0920	4.817	0	0	Taipei Veterans General Hospital	Infection	Natl Hlth Res Inst	0	0		1	1	1												1	1		1					1
Mortality in Emergency Department Sepsis score as a prognostic indicator in patients with pyogenic liver abscess	2013	320655100005	Emergency Medicine	American Journal of Emergency Medicine	0735-6757	1.152	0	0	Chung Shan Medical University & Hospital	NA	Chung Shan Med Univ	0	0		1	1	1													1							1		1
									Minist Hlth & Welf, Taichung Hospital
Effect of 6 months of whole body vibration on lumbar spine bone density in postmenopausal women: a randomized controlled trial	2013	327707400001	Geriatrics & Gerontology	Clinical Interventions in Aging	1176-9092	1.824	0	0	Minist Hlth & Welf, Taichung Hospital	Rehabilitation	Chung Shan Med Univ	0	0		1	1																		1
Does diabetes mellitus with or without gallstones increase the risk of gallbladder cancer? Results from a population-based cohort study	2013	321971500008	Gastroenterology & Hepatology	Journal of Gastroenterology	0944-1174	4.02	0	0	China Medical University Hospital	中醫	China Med Univ Hosp	0	0		0	1	1		1												1		1
Gallstones, a cholecystectomy, chronic pancreatitis, and the risk of subsequent pancreatic cancer in diabetic patients: a population-based cohort study	2013	320580100006	Gastroenterology & Hepatology	Journal of Gastroenterology	0944-1174	4.02	0	0	China Medical University Hospital	中醫	China Med Univ Hosp	0	0		1	1	1		1												1
Statin Use and Risk of Lung Cancer in Males: A Case-Control Study in Taiwan	2013	323463000005	Medicine, General & Internal	Kuwait Medical Journal	0023-5776	0.098	1	0	China Medical University Hospital	FM	China Med Univ Hosp	0	0		1	1	1			1																1
Statin use and risk of hepatocellular carcinoma	2013	321243900005	Public, Environmental & Occupational Health	European Journal of Epidemiology	0393-2990	5.147	1	0	China Medical University Hospital	FM	China Med Univ Hosp	0	0		1	1	1			1																1
Risk of Major Osteoporotic Fracture After Cardiovascular Disease: A Population-Based Cohort Study in Taiwan	2013	319246700005	Public, Environmental & Occupational Health	Journal of Epidemiology	0917-5040	2.862	1	0	China Medical University Hospital	FM	China Med Univ Hosp	0	0		1	1	1			1																1
Kidney Cancer and Diabetes Mellitus: A Population-Based Case-Control Study in Taiwan	2013	317995100004	Medicine, General & Internal	Annals Academy of Medicine Singapore	0304-4602	1.221	1	0	China Medical University Hospital	FM	China Med Univ Hosp	0	0		1	1	1			1																1
Cardiovascular Disease and Colorectal Cancer: A Population-Based Observation in Taiwan	2013	315620900006	Medicine, General & Internal	Kuwait Medical Journal	0023-5776	0.098	1	0	China Medical University Hospital	FM	China Med Univ Hosp	0	0		1	1	1			1																1
Second primary tumors and myeloperoxidase expression in buccal mucosal squamous cell carcinoma	2013	324244700029	Dentistry, Oral Surgery & Medicine	Oral Surgery Oral Medicine Oral Pathology Oral Radiology	2212-4403	1.265	0	0	Armed Forces General Hospital	Patho	Kaohsiung Vet Gen Hosp	0	0		1	1			1
A Screening Tool for Dengue Fever in Children	2013	316669200014	Immunology	Pediatric Infectious Disease Journal	0891-3668	3.135	0	0	Chi Mei Medical Center	Emergency	Chi Mei Med Ctr	1	USA	North America	1	1			1	1																	1
			Infectious Diseases
			Pediatrics
Population-based cohort study on the increase in the risk for type 2 diabetes mellitus development from nonapnea sleep disorders	2013	323603300020	Clinical Neurology	Sleep Medicine	1389-9457	3.1	0	0	Taichung Veterans General Hospital	META	Taichung Vet Gen Hosp	0	0		1	1	1																1	1
Impact of susceptibility profiles of Gram-negative bacteria before and after the introduction of ertapenem at a medical center in northern Taiwan from 2004 to 2010	2013	312683200020	Infectious Diseases	Diagnostic Microbiology and Infectious Disease	0732-8893	2.568	0	0	Minist Hlth & Welf, Taichung Hospital	Infection	Mackay Mem Hosp	0	0		1	1														1						1		1
			Microbiology
Multiple and large simple renal cysts are associated with prehypertension and hypertension	2013	318344000021	Urology & Nephrology	Kidney International	0085-2538	8.52	1	1	National Cheng Kung University & Hospital	FM	Natl Cheng Kung Univ Hosp	0	0		0	0
Diagnostic value of procalcitonin for bacterial infection in elderly patients - a systemic review and meta-analysis	2013	330102700021	medicine	International Journal of Clinical Practice	1368-5031	2.538	0	1	Chang Gung Memorial Hospital	Rehabilitation	Taipei Vet Gen Hosp	1	USA	North America	1	1	1																				1
			General & Internal
			Pharmacology & Pharmacy
Development of a Chinese Childbearing Attitude Questionnaire for Infertile Women Receiving In Vitro Fertilization Treatment	2013	330286700002	Nursing	Journal of Transcultural Nursing	1043-6596	0.83	0	1	Minist Hlth & Welf, Taichung Hospital	Nursing	Chung Shan Med Univ Hosp	0	0		1	1
Effects of Selective Serotonin Reuptake Inhibitors Versus Tricyclic Antidepressants on Cerebrovascular Events A Nationwide Population-Based Cohort Study	2013	330346800010	Pharmacology & Pharmacy	Journal of Clinical Psychopharmacology	0271-0749	3.761	1	0	Cathay General Hospital	FM	Cathay Gen Hosp	0	0		1	1	1							1			1
			Psychiatry
Discontinuation of statin therapy associates with Parkinson disease A population-based study	2013	330741800008	Clinical Neurology	Neurology	0028-3878	8.303	1	0	Cathay General Hospital	FM	Cathay Gen Hosp	0	0		1	1								1			1
Virally inactivated human platelet concentrate lysate induces regulatory T cells and immunosuppressive effect in a murine asthma model	2013	324055200009	Hematology	Transfusion	0041-1132	3.568	0	0	Taipei Medical University & Hospital	Immunology	Taipei Med Univ	1	France	Europe	1	1
Obesity and the Occurrence of Bronchitis in Adolescents	2013	322086900022	Endocrinology & Metabolism	Obesity	1930-7381	4.389	0	0	Taipei City Hospital	Publ Hlth	Natl Taiwan Univ	0	0		1	1	1
			Nutrition & Dietetics
Waist-to-height ratio, waist circumference, and body mass index as indices of cardiometabolic risk among 36,642 Taiwanese adults	2013	313812100005	Nutrition & Dietetics	European Journal of Nutrition	1436-6207	3.84	0	0	Chang Gung Memorial Hospital	Occupational Medicine	Chang Gung Mem Hosp	0	0		1	1		1																			1
Percentage of Body Fat Assessment Using Bioelectrical Impedance Analysis and Dual-Energy X-ray Absorptiometry in a Weight Loss Program for Obese or Overweight Chinese Adults	2013	316930900003	Multidisciplinary Sciences	PLoS One	1932-6203	3.534	0	0	China Medical University Hospital	Publ Hlth	China Med Univ	0	0		1	1	1			1							1
Interactions between cigarette smoking and polymorphisms of xenobiotic-metabolizing genes: The risk of oral leukoplakia	2013	316853500004	Biotechnology & Applied Microbiology	Disease Markers	0278-0240	2.174	0	0	China Medical University Hospital	Publ Hlth	China Med Univ	0	0		1	1	1
			Genetics & Heredity
			Medicine
			Research & Experimental
			Pathology
A Nationwide Survey of Nurses' Attitudes Toward Music Therapy and Their Need for Education in Its Application	2013	329023600005	Nursing	Journal of Continuing Education in Nursing	0022-0124	0.6	1	0	Buddhist Tzu Chi General Hospital	FM	Buddhist Tzu Chi Gen Hosp	0	0		1	1
Evaluation of second phase insulin secretion with simple surrogates derived from the mixed meal tolerance test in patients with type 2 diabetes	2013	326486900007	Endocrinology & Metabolism	Endocrine Journal	0918-8959	2.019	0	0	Cardinal Tien Hospital	META	Buddhist Dalin Tzu Chi Gen Hosp	0	0		1	1																	1
Metabolic syndrome in normoglycaemic elderly men	2013	325007600010	medicine	International Journal of Clinical Practice	1368-5031	2.538	0	0	Cardinal Tien Hospital	META	Buddhist Dalin Tzu Chi Gen Hosp	0	0		1	1																	1			1
			General & Internal
			Pharmacology & Pharmacy
Thalidomide inhibits fibronectin production in TGF-beta 1-treated normal and keloid fibroblasts via inhibition of the p38/Smad3 pathway	2013	319491900004	Pharmacology & Pharmacy	Biochemical Pharmacology	0006-2952	4.65	0	0	National Taiwan University & Hospital	Inst Anat & Cell Biol	Natl Taiwan Univ	0	0		1	1																							1
Factors affecting the physician-patient relationship of older veterans with inadequate health literacy: an observational study	2013	325523300008	Primary Health Care	British Journal of General Practice	0960-1643	2.356	0	0	Taipei Veterans General Hospital	Nursing	Taipei Vet Gen Hosp	0	0		1	1
			Medicine
			General & Internal
Cluster headache is associated with an increased risk of depression: A nationwide population-based cohort study	2013	313522300005	Clinical Neurology	Cephalalgia	0333-1024	4.121	0	0	Taipei Veterans General Hospital	neuro	Taipei Vet Gen Hosp	0	0		1	1				1							1		1			1
			Neurosciences
Comparison of tumor recurrence between laparoscopic total mesorectal excision with sphincter preservation and laparoscopic abdominoperineal resection for low rectal cancer	2013	323621500050	Surgery	Surgical Endoscopy and Other Interventional Techniques	0930-2794	3.313	0	0	National Taiwan University & Hospital	CRS	Natl Taiwan Univ Hosp	0	0		0	1																							1									1
Damage from periorbital ageing to the multilayered structures and resilience of the skin in Chinese population	2013	318989900003	Pathology	International Journal of Experimental Pathology	0959-9673	2.052	1	0	Taipei Medical University & Hospital	FM	Taipei Med Univ	0	0		0	1																					1		1
Dynamic Analysis of Modified Transcutaneous Lower Blepharoplasty Based on Biochemical and Biophysical Principles	2013	330458800003	Surgery	Annals of Plastic Surgery	0148-7043	1.458	1	0	Taipei Medical University & Hospital	FM	Taipei Med Univ Hosp	0	0		0	1																							1
Application of quantitative estimates of fecal hemoglobin concentration for risk prediction of colorectal neoplasia	2013	328082500025	Gastroenterology & Hepatology	World Journal of Gastroenterology	1007-9327	2.433	0	0	Shin Kong Wu Ho Su Mem Hosp	GI	Shin Kong Wu Ho Su Mem Hosp	0	0		1	1				1											1
Distributions of Usage and the Costs of Conventional Medicine and Traditional Chinese Medicine for Lung Cancer Patients in Taiwan	2013	322472900001	Integrative & Complementary Medicine	Evidence-Based Complementary and Alternative Medicine	1741-427X	2.175	0	0	China Medical University Hospital	Chinese	China Med Univ	0	0		1	1			1	1
HMG-CoA reductase inhibitors activate caspase-1 in human monocytes depending on ATP release and P2X7 activation	2013	314358100014	Cell Biology	Journal of Leukocyte Biology	0741-5400	4.304	0	0	National Taiwan University & Hospital	Pharm	Natl Taiwan Univ Hosp	0	0		1	1
			Hematology
			Immunology
Job autonomy, its predispositions and its relation to work outcomes in community health centers in Taiwan	2013	319709000003	Health Policy & Services	Health Promotion International	0957-4824	1.736	0	1	China Medical University Hospital	Publ Hlth	China Med Univ	0	0		1	1				1				1
			public
			Environmental & Occupational Health
Risks of Diabetic Nephropathy with Variation in Hemoglobin A(1c) and Fasting Plasma Glucose	2013	326050300037	medicine	American Journal of Medicine	0002-9343	5.302	1	0	China Medical University Hospital	FM	China Med Univ Hosp	0	0		1	1			1								1						1
			General & Internal
Time trend analysis of the prevalence and incidence of diagnosed type 2 diabetes among adults in Taiwan from 2000 to 2007: a population-based study	2013	317778100001	public	Bmc Public Health	1471-2458	2.321	1	0	China Medical University Hospital	FM	China Med Univ Hosp	0	0		1	1	1			1							1
			Environmental & Occupational Health
Correlation of rater training and reliability in performance assessment: Experience in a school of dentistry	2013	325843200006	Dentistry	Journal of Dental Sciences	1991-7902	0.465	0	1	National Taiwan University & Hospital	Dnet	Natl Taiwan Univ Hosp	0	0		0	1
			Oral Surgery & Medicine
Clinical and Prognostic Implications of Transcription Factor SOX4 in Patients with Colon Cancer	2013	321150000030	Multidisciplinary Sciences	PLoS One	1932-6203	3.534	0	0	Chi Mei Medical Center	Ortho	Taipei Med Univ Hosp	1	USA	North America	1	1																1															1
Synergistic Interaction Between Alcoholism and Polypharmacy on the Risk of Falls in the Elderly	2013	321406900012	Geriatrics & Gerontology	International Journal of Gerontology	1873-9598	0.473	1	0	Buddhist Tzu Chi General Hospital	FM	Taichung Tzu Chi Gen Hosp	0	0		1	1				1																1
Rapid and intermediate N-acetylators are less susceptible to oxidative damage among 4,4 '-methylenebis(2-chloroaniline) (MBOCA)-exposed workers	2013	321032000017	Public	International Journal of Hygiene and Environmental Health	1438-4639	3.276	1	0	Tri-Service General Hospital	FM	Triserv Gen Hosp	0	0		1	1	1	1													1								1
			Environmental & Occupational Health
			Infectious Diseases
Beta-cell function and insulin sensitivity at various degrees of glucose tolerance in Chinese subjects	2013	320591300018	Endocrinology & Metabolism	Diabetes Research and Clinical Practice	0168-8227	2.536	0	0	Cardinal Tien Hospital	META	Shuang Ho Hosp	0	0		1	1																	1			1
Obstructed hemivagina and ipsilateral renal anomaly with uterus didelphys and vaginal discharge	2013	331352600027	Obstetrics & Gynecology	Taiwanese Journal of Obstetrics & Gynecology	1028-4559	1.261	0	0	Tainan Municipal Hospital	GYN	Tainan Municipal Hosp	0	0		0	1																		1												1
Effects on uric acid, body mass index and blood pressure in adolescents of consuming beverages sweetened with high-fructose corn syrup	2013	317410300010	Endocrinology & Metabolism	International Journal of Obesity	0307-0565	5.386	0	0	Kaohsiung Medical University & Hospital	Occupational Medicine	Natl Yang Ming Univ	0	0		1	1	1																													1
			Nutrition & Dietetics
Characteristics and Health Behavior of Newly Developed Metabolic Syndrome Among Community-Dwelling Elderly in Taiwan	2013	321406900006	Geriatrics & Gerontology	International Journal of Gerontology	1873-9598	0.473	1	1	Taipei Veterans General Hospital	FM	Taipei Vet Gen Hosp	0	0		1	1												1
Trend of Urban-Rural Disparities in Hospice Utilization in Taiwan	2013	318343700059	Multidisciplinary Sciences	PLoS One	1932-6203	3.534	1	1	Taipei Veterans General Hospital	FM	Taipei Vet Gen Hosp	0	0		1	1												1
The rural - urban divide in ambulatory care of gastrointestinal diseases in Taiwan	2013	316332600001	Health Policy & Services	Bmc International Health and Human Rights	1472-698X	1.096	1	1	Taipei Veterans General Hospital	FM	Taipei Vet Gen Hosp	0	0		1	1												1
			Public
			Environmental & Occupational Health
Ampicillin and Amoxicillin Use and the Risk of Klebsiella pneumoniae Liver Abscess in Taiwan	2013	320858500008	Immunology	Journal of Infectious Diseases	0022-1899	5.778	0	0	Taipei Veterans General Hospital	Infection	Taipei Vet Gen Hosp	0	0		1	1	1													1		1						1
			Infectious Diseases
			Microbiology
Can melamine levels in 1-spot overnight urine specimens predict the total previous 24-hour melamine excretion level in school children?	2013	320637300020	Medical Laboratory Technology	Clinica Chimica Acta	0009-8981	2.764	1	1	Kaohsiung Medical University & Hospital	FM	Kaohsiung Med Univ Hosp	0	0		1	1	1	1																									1
High Cost and Low Survival Rate in High Comorbidity Incident Elderly Hemodialysis Patients	2013	326405300203	Multidisciplinary Sciences	PLoS One	1932-6203	3.534	0	0	Kaohsiung Medical University & Hospital	Nephro	Kaohsiung Med Univ Hosp	0	0		1	1	1												1							1
Oseltamivir use and outcomes during the 2009 influenza A H1N1 pandemic in Taiwan	2013	322585100001	Public	Bmc Public Health	1471-2458	2.321	0	1	Taipei Medical University & Hospital	FM	Taipei Med Univ	0	0		1	1	1																			1
			Environmental & Occupational Health
Late-life metabolic syndrome prevents cognitive decline among older men aged 75 years and over: One-year prospective cohort study	2013	321272300005	Geriatrics & Gerontology	Journal of Nutrition Health & Aging	1279-7707	2.659	0	0	Taipei Medical University & Hospital	Geriatr & Gerontol	Taipei Vet Gen Hosp	0	0		1	1					1
			Nutrition & Dietetics
Pneumonia Risk and Use of Angiotensin-Converting Enzyme Inhibitors and Angiotensin II Receptor Blockers	2013	324146500005	Public	Journal of Epidemiology	0917-5040	2.862	1	0	En Chu Kong Hosp	FM	En Chu Kong Hosp	0	0		1	1	1						1													1
			Environmental & Occupational Health
Association between endothelial nitric oxide synthase polymorphisms and risk of metabolic syndrome	2013	314837400005	Biotechnology & Applied Microbiology	Disease Markers	0278-0240	2.174	1	0	China Medical University Hospital	FM	China Med Univ Hosp	0	0		1	1	1			1
			Genetics & Heredity
			Medicine
			Research & Experimental
			Pathology
Potential Osteoporosis Recovery by Deep Sea Water through Bone Regeneration in SAMP8 Mice	2013	324437800001	Integrative & Complementary Medicine	Evidence-Based Complementary and Alternative Medicine	1741-427X	2.175	0	0	Taipei Medical University & Hospital	Stem Cell Res Ctr	Taipei Med Univ	1	Peoples R China	Asia	1	1																											1				1
Mild Chronic Kidney Disease Associated with Greater Risk of Arterial Stiffness in Elderly Adults	2013	325551500016	Geriatrics & Gerontology	Journal of the American Geriatrics Society	0002-8614	4.216	1	1	National Cheng Kung University & Hospital	FM	Natl Cheng Kung Univ Hosp	0	0		0	0
Age-related skeletal muscle mass loss and physical performance in Taiwan: Implications to diagnostic strategy of sarcopenia in Asia	2013	328392600019	Geriatrics & Gerontology	Geriatrics & Gerontology International	1444-1586	1.575	0	0	Taipei Veterans General Hospital	Ctr Geriatr & Gerontol	Taipei Vet Gen Hosp	0	0		1	1	1				1
Combined effects of hepatitis B virus infection and elevated alanine aminotransferase levels on dyslipidemia	2013	314436300007	Endocrinology & Metabolism	Metabolism-Clinical and Experimental	0026-0495	3.611	1	1	Shin Kong Wu Ho Su Mem Hosp	FM	Shin Kong Wu Ho Su Mem Hosp	0	0		1	0
Menstrual Cycle and Detectable Human Papillomavirus in Reproductive-age Women: A Time Series Study	2013	326377500009	Immunology	Journal of Infectious Diseases	0022-1899	5.778	1	1	Chang Gung Memorial Hospital	FM	Chang Gung Mem Hosp	1	USA	North America	1	1	1													1
			Infectious Diseases
			Microbiology
Oral contraceptive pill use is associated with reduced odds of nonalcoholic fatty liver disease in menstruating women: results from NHANES III	2013	325828700007	Gastroenterology & Hepatology	Journal of Gastroenterology	0944-1174	4.02	0	0	Far Eastern Memoral Hospital	Publ Hlth	Johns Hopkins	1	USA	North America	1	1	1																	1
Obesity and Human Papillomavirus Infection in Perimenopausal Women	2013	326046400005	Immunology	Journal of Infectious Diseases	0022-1899	5.778	1	1	Chang Gung Memorial Hospital	FM	Chang Gung Mem Hosp	1	USA	North America	1	1	1																													1
			Infectious Diseases
			Microbiology
Genetic polymorphisms of myeloperoxidase and their effect on hypertension	2013	324833300002	Peripheral Vascular Disease	Blood Pressure	0803-7051	1.605	0	0	Taipei Medical University & Hospital	CV	Taipei City Hosp	0	0		1	1	1							1
Erosive esophagitis associated with metabolic syndrome, impaired liver function, and dyslipidemia	2013	324909300014	Gastroenterology & Hepatology	World Journal of Gastroenterology	1007-9327	2.433	1	1	Chang Gung Memorial Hospital	FM	Chang Gung Mem Hosp	0	0		1	1																	1
Sarcopenic obesity is closely associated with metabolic syndrome	2013	323933700010	Endocrinology & Metabolism	Obesity Research & Clinical Practice	1871-403X	0.697	1	1	National Taiwan University & Hospital	FM	Natl Taiwan Univ Hosp	0	0		1	1					1
			Nutrition & Dietetics
Postpartum eclampsia with cerebral air embolism	2013	325838700024	Obstetrics & Gynecology	Taiwanese Journal of Obstetrics & Gynecology	1028-4559	1.261	1	0	Taipei Veterans General Hospital	FM	Taipei Vet Gen Hosp	0	0		1	1																														1
AS03-adjuvanted versus non-adjuvanted inactivated trivalent influenza vaccine against seasonal influenza in elderly people: a phase 3 randomised trial	2013	319539700023	Infectious Diseases	Lancet Infectious Diseases	1473-3099	19.446	0	0	Taipei Veterans General Hospital	NA	Adv Med Res Inst Canada	1	Canada	North America	1	1														1																1
													USA	North America
													Germany	Europe
													France	Europe
													Mexico	Central America
													Netherlands	Europe
													Poland	Europe
The Association between Nonalcoholic Fatty Pancreas Disease and Diabetes	2013	321202100016	Multidisciplinary Sciences	PLoS One	1932-6203	3.534	0	0	National Cheng Kung University & Hospital	Internal Med	Natl Cheng Kung Univ Hosp	0	0		1	1																				1
Multiple mechanisms of GW-9508, a selective G protein-coupled receptor 40 agonist, in the regulation of glucose homeostasis and insulin sensitivity	2013	316200100012	Endocrinology & Metabolism	American Journal of Physiology-Endocrinology and Metabolism	0193-1849	4.088	0	1	National Cheng Kung University & Hospital	FM	Natl Cheng Kung Univ Hosp	0	0		0	1																				1
			Physiology
Epidemiological Survey of Quantitative Ultrasound in Risk Assessment of Falls in Middle-Aged and Elderly People	2013	323109700074	Multidisciplinary Sciences	PLoS One	1932-6203	3.534	0	1	National Cheng Kung University & Hospital	Internal Med	Natl Cheng Kung Univ Hosp	0	0		1	1	1				1																										1
Nonsteroidal anti-inflammatory drug use is associated with cancer risk reduction in chronic dialysis patients	2013	321044400025	Urology & Nephrology	Kidney International	0085-2538	8.52	0	0	Taipei Veterans General Hospital	Nephro	Taipei Vet Gen Hosp	0	0		1	1	1										1		1			1																	1
Does Alzheimer's Disease Protect against Cancers? A Nationwide Population-Based Study	2013	312613500006	Public, Environmental & Occupational Health	Neuroepidemiology	0251-5350	2.476	0	0	Taipei Veterans General Hospital	Neuro	Taipei Vet Gen Hosp	0	0		1	1	1															1				1
			Clinical Neurology
Tuberculosis in myasthenia gravis	2013	313227600015	Infectious Diseases	International Journal of Tuberculosis and Lung Disease	1027-3719	2.756	0	0	Taipei Veterans General Hospital	Nephro	Taipei Vet Gen Hosp	0	0		1	1	1									1	1		1			1																	1
			Respiratory System
Association of X-ray Repair Cross-complementing-6 Genotypes with Childhood Leukemia	2013	328801900022	Oncology	Anticancer Research	0250-7005	1.072	0	0	Minist Hlth & Welf, Taoyuan Gen Hosp	Pediat	Minist Hlth & Welf, Taoyuan Gen Hosp	0	0		1	1																		1
What Influences the Willingness of Community Physicians to Provide Palliative Care for Patients with Terminal Cancer? Evidence from a Nationwide Survey	2013	315643800009	Oncology	Japanese Journal of Clinical Oncology	0368-2811	1.747	1	1	National Taiwan University & Hospital	FM	Natl Taiwan Univ Hosp	0	0		1	1				1
									China Medical University Hospital
The Official Positions of the International Society for Clinical Densitometry: Body Composition Analysis Reporting	2013	326851500020	Endocrinology & Metabolism	Journal of Clinical Densitometry	1094-6950	1.603	0	0	National Cheng Kung University & Hospital	Med	Houston Methodist Hosp	1	USA	North America	1	1																	1			1
Prolonged Induction Activates Cebp alpha Independent Adipogenesis in NIH/3T3 Cells	2013	313552400004	Multidisciplinary Sciences	PLoS One	1932-6203	3.534	0	1	Buddhist Tzu Chi General Hospital	Mol and Cell Biology	Tzu Chi Univ	0	0		1	1
The Risk of Cancer in Patients with Generalized Anxiety Disorder: A Nationwide Population-Based Study	2013	315519000105	Multidisciplinary Sciences	PLoS One	1932-6203	3.534	0	0	Taipei Veterans General Hospital	Psychi	Taichung Vet Gen Hosp	0	0		1	1	1						1						1			1		1		1
The Risk of Cancer among Taiwanese Female Registered Nurses: A Nationwide Retrospective Study	2013	322064300032	Multidisciplinary Sciences	PLoS One	1932-6203	3.534	0	0	Taipei Veterans General Hospital	Psychi	Taichung Vet Gen Hosp	0	0		1	1	1						1								1	1		1		1
Sleep Apnea and Risk of Peptic Ulcer Bleeding: A Nationwide Population-based Study	2013	314873800025	Medicine	American Journal of Medicine	0002-9343	5.302	0	0	Taipei Veterans General Hospital	CM	Taipei Vet Gen Hosp	0	0		1	1	1			1								1			1	1						1
			General & Internal
Effect of surfactant concentration on characteristics of mesoporous bioactive glass prepared by evaporation induced self-assembly process	2013	312004800018	Chemistry	Applied Surface Science	0169-4332	2.538	0	0	Chang Gung Memorial Hospital	Dept Fragrance & Cosmet Sci	Kaohsiung Med Univ	0	0		1	1																					1										1
			Physical
			Materials Science
			Coatings & Films
			Physics
			Condensed Matter
Effect of a Compassion-Focused Training Program in Palliative Care Education for Medical Students	2013	317673400003	Health Care Sciences & Services	American Journal of Hospice & Palliative Medicine	1049-9091	1.347	1	1	National Taiwan University & Hospital	FM	Natl Taiwan Univ Hosp	0	0		0	1
Incidence, life expectancy and prognostic factors in cancer patients under prolonged mechanical ventilation: a nationwide analysis of 5,138 cases during 1998-2007	2013	331539700018	Critical Care Medicine	Critical Care	1466-609X	5.035	1	0	National Taiwan University & Hospital	FM	Natl Taiwan Univ Hosp, Jin Shan Branch	0	0		1	1	1	1																		1			1
Risk of refracture associated with compliance and persistence with bisphosphonate therapy in Taiwan	2013	314274400013	Endocrinology & Metabolism	Osteoporosis International	0937-941X	4.165	0	0	National Cheng Kung University & Hospital	GYN	Chang Gung Mem Hosp	0	0		1	1																	1													1	1
High seroprevalence of human herpesvirus type 8 in patients with end-stage renal disease in Taiwan	2013	323564500016	Virology	Journal of Clinical Virology	1386-6532	3.466	0	0	Buddhist Tzu Chi General Hospital	Patho	Buddhist Dalin Tzu Chi Gen Hosp	0	0		0	1													1																	1
Efficacy of hepatitis B vaccine boosters among neonatally vaccinated university freshmen in Taiwan	2013	317375600008	Gastroenterology & Hepatology	Journal of Hepatology	0168-8278	10.401	1	0	Taipei Medical University & Hospital	FM	Taipei Med Univ Hosp	0	0		1	1	1
Amiodarone and the Risk of Cancer A Nationwide Population-Based Study	2013	318115000014	Oncology	Cancer	0008-543X	4.901	0	0	Taipei Veterans General Hospital	Chest	Taipei Vet Gen Hosp	0	0		1	1	1											1	1			1				1
Allergic rhinitis and risk of erectile dysfunction - a nationwide population-based study	2013	316323600005	Allergy	Allergy	0105-4538	5.995	0	0	Taipei Veterans General Hospital	Chest	Taipei Vet Gen Hosp	0	0		0	1	1											1				1				1	1
			Immunology
The association between hyperuricemia and betel nut chewing in Taiwanese men: a cross-sectional study	2013	329305600002	Public, Environmental & Occupational Health	Bmc Public Health	1471-2458	2.321	0	0	Chia Yi Christian Hospital	META	Chia Yi Christian Hosp	0	0		1	1	1			1									1				1
Epidemiological and molecular analysis of human norovirus infections in Taiwan during 2011 and 2012	2013	322335200001	Infectious Diseases	Bmc Infectious Diseases	1471-2334	2.561	1	0	Wei Gong Mem Hosp	FM	Wei Gong Mem Hosp	0	0		1	1	1
									Da Chien Gen Hosp
Depressive symptoms as an independent risk factor for mortality in elderly persons: Results of a national longitudinal study	2013	317738100009	Geriatrics & Gerontology	Aging & Mental Health	1360-7863	1.781	0	0	Chung Shan Medical University & Hospital	Psychi	Chung Shan Med Univ Hosp	0	0		1	1	1				1		1
			Psychiatry
Change in depressive status and mortality in elderly persons: Results of a national longitudinal study	2013	311343300040	Geriatrics & Gerontology	Archives of Gerontology and Geriatrics	0167-4943	1.525	0	0	Chung Shan Medical University & Hospital	Psychi	Chung Shan Med Univ Hosp	0	0		1	1	1				1		1
Increased incidence of orthopedic fractures in cirrhotic patients: A nationwide population-based study	2013	317375600011	Gastroenterology & Hepatology	Journal of Hepatology	0168-8278	10.401	0	0	Taipei Veterans General Hospital	Psychi	Taipei Vet Gen Hosp	0	0		1	1							1								1	1
Epidemiology of Idiopathic Central Serous Chorioretinopathy in Taiwan, 2001-2006: A Population-based Study	2013	321738400070	Multidisciplinary Sciences	PLoS One	1932-6203	3.534	0	0	Taipei Veterans General Hospital	Ophthalmol	Taipei Vet Gen Hosp	0	0		1	1	1			1				1
A microRNA-520 mirSNP at the MMP2 gene influences susceptibility to endometriosis in Chinese women	2013	318012700006	Genetics & Heredity	Journal of Human Genetics	1434-5161	2.526	0	0	Kaohsiung Medical University & Hospital	GYN	Kaohsiung Med Univ Hosp	0	0		0	1	1																													1
Plasma Adiponectin Levels Correlate Positively with an Increasing Number of Components of Frailty in Male Elders	2013	315970300138	Multidisciplinary Sciences	PLoS One	1932-6203	3.534	1	0	National Taiwan University & Hospital	FM	Natl Taiwan Univ Hosp	0	0		1	1				1	1		1													1
Levamisole-induced myopathy and leukocytoclastic vasculitis: a case report and literature review	2013	327997100007	Dermatology	Dermatologic Therapy	1396-0296	1.478	1	0	National Taiwan University & Hospital	FM	Natl Taiwan Univ Hosp	0	0		1	1											1
Evaluating the Satisfaction of Immigrant Women from a Rural Community Regarding Family Functioning and Health-Related Quality of Life	2013	316395100002	Public, Environmental & Occupational Health	Women & Health	0363-0242	1.194	0	0	Taipei City Hospital	Hlth Management	I Shou Univ	0	0		1	1				1
			Women's Studies
Areca Nut Chewing and Risk of Atrial Fibrillation in Taiwanese Men: A Nationwide Ecological Study	2013	320189500002	Medicine, General & Internal	International Journal of Medical Sciences	1449-1907	1.552	0	0	Kaohsiung Medical University & Hospital	CV	Kaohsiung Med Univ Hosp	0	0		0	1	1							1												1
Significant Correlation of P-Wave Parameters With Left Atrial Volume Index and Left Ventricular Diastolic Function	2013	330432900007	Medicine, General & Internal	American Journal of the Medical Sciences	0002-9629	1.515	0	0	Kaohsiung Medical University & Hospital	CV	Kaohsiung Med Univ Hosp	0	0		0	1								1												1
Seasonality, clinical types and prognostic factors of Vibrio vulnificus infection	2013	324538300006	Infectious Diseases	Journal of Infection in Developing Countries	1972-2680	1.267	0	1	Minist Hlth & Welf, Taichung Hospital	ENT	Chia Yi Christian Hosp	1	USA	North America	1	1																1						1	1
Selenium is inversely associated with interleukin-6 in the elderly	2013	316077100014	Geriatrics & Gerontology	Journal of Nutrition Health & Aging	1279-7707	2.859	1	1	China Medical University Hospital	FM	China Med Univ Hosp	0	0		1	1			1	1
			Nutrition & Dietetics
The Effect of Cold Temperature on Increased Exacerbation of Chronic Obstructive Pulmonary Disease: A Nationwide Study	2013	316409800006	Multidisciplinary Sciences	PLoS One	1932-6203	3.534	0	0	Taipei Veterans General Hospital	Chest	Taipei Vet Gen Hosp	0	0		1	1							1				1	1	1
Identification of Biomarkers for Esophageal Squamous Cell Carcinoma Using Feature Selection and Decision Tree Methods	2013	328793100001	Multidisciplinary Sciences	Scientific World Journal	1537-744X	1.219	0	0	Kaohsiung Medical University & Hospital	Pharm	Kaohsiung Med Univ	0	0		1	1	1	1													1											1
Association of time-location patterns with urinary cotinine among asthmatic children under household environmental tobacco smoke exposure	2013	320294100002	Environmental Sciences	Environmental Research	0013-9351	3.951	0	0	Taipei City Hospital	Publ Hlth	Natl Taiwan Univ Hosp	0	0		1	1	1
			Public, Environmental & Occupational Health
A comparative proteomics analysis of peritoneal dialysate before and after the occurrence of peritonitis episode by mass spectrometry	2013	320637300006	Medical Laboratory Technology	Clinica Chimica Acta	0009-8981	2.764	0	0	Chi Mei Medical Center	Radio	Kaohsiung Med Univ	0	0		1	1		1											1
Outcome Comparison between Laparoscopic and Open Appendectomy: Evidence from a Nationwide Population-Based Study	2013	321718700038	Multidisciplinary Sciences	PLoS One	1932-6203	3.534	0	0	PoJen General Hospital	GS	PoJen Gen Hosp	0	0		1	1				1																			1
The Impacts of using community health volunteers to coach medication safety behaviors among rural elders with chronic illnesses	2013	318665100008	Geriatrics & Gerontology	Geriatric Nursing	0197-4572	0.922	0	0	National Cheng Kung University & Hospital	Nursing	Natl Cheng Kung Univ Hosp	1	USA	North America	1	1
			Nursing
Serum adhesion molecules, outcome and neuro-psychological function in acute traumatic brain injury patients	2013	320976100023	Medical Laboratory Technology	Clinica Chimica Acta	0009-8981	2.764	0	0	Chang Gung Memorial Hospital	NS	Kaohsiung Chang Gung Mem Hosp	0	0		1	1			1								1							1										1
Long-term use of angiotensin II receptor blockers and risk of cancer: A population-based cohort analysis	2013	323569600087	Cardiac & Cardiovascular Systems	International Journal of Cardiology	0167-5273	6.175	0	0	Taipei Veterans General Hospital	Med Res & Educ	Taipei Vet Gen Hosp	0	0		0	1								1
Sphincter-Preserving Surgery for Rectal Cancer: A Population-Based Study in Taiwan	2013	320740700015	Gastroenterology & Hepatology	Hepato-Gastroenterology	0172-6390	0.907	0	0	Taipei Veterans General Hospital	Cancer	Taipei Vet Gen Hosp	0	0		0	1	1																								1
			Surgery
Factors Affecting Treatment Decisions and Outcomes of Root-Resected Molars: A Nationwide Study	2013	328686100004	dentistry	Journal of Periodontology	0022-3492	2.565	0	0	Tri-Service General Hospital	Periodontol	Triserv Gen Hosp	0	0		1	1	1
			Oral Surgery & Medicine
Subclinical hypothyroidism is associated with elevated high-sensitive C-reactive protein among adult Taiwanese	2013	327396300022	Endocrinology & Metabolism	Endocrine	1355-008X	3.527	1	1	China Medical University Hospital	FM	China Med Univ Hosp	1	USA	North America	1	1
Late effects on the health-related quality of life in a cohort population decades after environmental radiation exposure	2013	322589000006	Biology	International Journal of Radiation Biology	0955-3002	1.837	0	0	National Yang Ming University & Hospital	Environm & Occupat Hlth	Natl Yang Ming Univ	0	0		1	1	1																			1
			Nuclear Science & Technology
			radiology
			Nuclear Medicine & Medical Imaging
Activation of Akt by Advanced Glycation End Products (AGEs): Involvement of IGF-1 Receptor and Caveolin-1	2013	315637900084	Multidisciplinary Sciences	PLoS One	1932-6203	3.534	0	0	National Taiwan University & Hospital	Pharm	Natl Yang Ming Univ	0	0		1	1					1																1	1
Proteomic Profiling for Peritoneal Dialysate: Differential Protein Expression in Diabetes Mellitus	2013	320267100001	Biotechnology & Applied Microbiology	Biomed Research International	2314-6133	2.706	0	0	Chi Mei Medical Center	Dept Chem & Mat Engn	Natl Yunlin Univ Sci & Technol	0	0		1	1													1					1										1
			medicine
			Research & Experimental
Chronic rhinosinusitis confers an increased risk of acute myocardial infarction	2013	328452400005	Otorhinolaryngology	American Journal of Rhinology & Allergy	1945-8924	2.178	1	0	PoJen General Hospital	FM	PoJen Gen Hosp	0	0		1	1				1
Relationships between changes in leptin and insulin resistance levels in obese individuals following weight loss	2013	323359400005	Medicine	Kaohsiung Journal of Medical Sciences	1607-551X	0.805	0	0	Kaohsiung Municipal Tatung Hospital	Publ Hlth	Kaohsiung Med Univ	0	0		1	1	1																1						1
			Research & Experimental
Scrub Typhus Cases in a Teaching Hospital in Penghu, Taiwan, 2006-2010	2013	316186500003	Public	Vector-Borne and Zoonotic Diseases	1530-3667	2.531	1	0	Tri-Service General Hospital	FM	Triserv Gen Hosp	0	0		0	1														1				1			1
			Environmental & Occupational Health
			Infectious Diseases
Hyperglycemia is associated with enhanced gluconeogenesis in a rat model of permanent cerebral ischemia	2013	315611600006	Cell Biology	Molecular and Cellular Endocrinology	0303-7207	4.241	1	0	Taichung Veterans General Hospital	FM	Taichung Vet Gen Hosp	0	0		1	1																	1			1
			Endocrinology & Metabolism
CHRNA7 Polymorphisms and Response to Cholinesterase Inhibitors in Alzheimer's Disease	2013	329323900026	Multidisciplinary Sciences	PLoS One	1932-6203	3.534	1	0	Taiwan Adventist Hosp	FM	Taiwan Adventist Hosp	0	0		1	1	1				1						1
In-Hospital Mortality Risk Estimation in Patients with Acute Nonvariceal Upper Gastrointestinal Bleeding Undergoing Hemodialysis: A Retrospective Cohort Study	2013	314850500012	Urology & Nephrology	Renal Failure	0886-022X	0.775	0	0	Taichung Veterans General Hospital	Nephro	Taichung Vet Gen Hosp	0	0		1	1					1								1				1
Lists of geriatric syndromes in the Asian-Pacific geriatric societies	2013	331850900009	Geriatrics & Gerontology	European Geriatric Medicine	1878-7649	0.552	1	0	Kyung Hee Univ	FM	Kyung Hee Univ	1	South Korea	Asia	1	1					1		1													1
									National Taiwan University & Hospital				Philippines	Asia
													Indonesia	Asia
													Australia	Oceania
													Peoples R China	Asia
													Japan	Asia
													Singapore	Asia
													India	Asia
Environmental tobacco smoke and arsenic methylation capacity are associated with urothelial carcinoma	2013	325906200008	Medicine	Journal of the Formosan Medical Association	0929-6646	1.695	0	0	Taipei Medical University & Hospital	GU	Shuang Ho Hosp	0	0		1	1	1																										1
			General & Internal
Polymorphism of inflammatory genes and arsenic methylation capacity are associated with urothelial carcinoma	2013	325834200004	Pharmacology & Pharmacy	Toxicology and Applied Pharmacology	0041-008X	3.63	0	0	Taipei Medical University & Hospital	GU	Shung Ho Hosp	0	0		1	1	1																										1
			Toxicology
Temporal Changes of Urinary Oxidative Metabolites of Di(2-ethylhexyl)phthalate After the 2011 Phthalate Incident in Taiwanese Children: Findings of a Six Month Follow-Up	2013	327999400068	Engineering	Environmental Science & Technology	0013-936X	5.481	0	1	Kaohsiung Medical University & Hospital	Publ Hlth	Kaohsiung Med Univ	0	0		1	1	1	1									1
			Environmental Sciences
Sarcopenia is Related to Increased Risk for Low Bone Mineral Density	2013	315178500021	Endocrinology & Metabolism	Journal of Clinical Densitometry	1094-6950	1.603	1	1	National Taiwan University & Hospital	FM	Natl Taiwan Univ Hosp	0	0		1	1					1														1	1
Dissecting the Mechanisms of Left Ventricular Diastolic Dysfunction and Inflammation in Peritoneal Dialysis Patients	2013	319036100007	Multidisciplinary Sciences	PLoS One	1932-6203	3.534	0	0	Far Eastern Memoral Hospital	CV	Natl Taiwan Univ	0	0		1	1			1					1					1					1
Renin-Angiotensin System Genes Polymorphisms and Long-Term Prognosis in Taiwanese Patients with Hypertension and Coronary Artery Disease	2013	314256600004	Cardiac & Cardiovascular Systems	Acta Cardiologica Sinica	1011-6842	0.845	0	0	Far Eastern Memoral Hospital	Internal Med	Natl Taiwan Univ	0	0		1	1								1
The role of Hepassocin in the development of non-alcoholic fatty liver disease	2013	325754200024	Gastroenterology & Hepatology	Journal of Hepatology	0168-8278	10.401	1	1	National Cheng Kung University & Hospital	FM	Natl Cheng Kung Univ	0	0		0	1																	1
Association between Dietary Fiber Intake and Physical Performance in Older Adults: A Nationwide Study in Taiwan	2013	327221600192	Multidisciplinary Sciences	PLoS One	1932-6203	3.534	0	0	National Taiwan University & Hospital	Publ Hlth	Natl Hlth Res Inst,	1	USA	North America	1	1	1				1
Substance Use (Alcohol, Areca Nut and Cigarette) Is Associated with Poor Prognosis of Esophageal Squamous Cell Carcinoma	2013	315157200073	Multidisciplinary Sciences	PLoS One	1932-6203	3.534	0	1	Kaohsiung Medical University & Hospital	GI	Kaohsiung Med Univ Hosp	0	0		1	1	1	1													1					1			1			1
Cardiac autonomic function and insulin resistance for the development of hypertension: A six-year epidemiological follow-up study	2013	328078900010	Cardiac & Cardiovascular Systems	Nutrition Metabolism and Cardiovascular Diseases	0939-4753	3.875	1	1	National Cheng Kung University & Hospital	FM	Natl Cheng Kung Univ Hosp	0	0		0	1							1
			Endocrinology & Metabolism
			Nutrition & Dietetics
Association of home care needs and functional recovery among community-dwelling elderly hip fracture patients	2013	324024300022	Geriatrics & Gerontology	Archives of Gerontology and Geriatrics	0167-4943	1.525	0	0	Kaohsiung Veterans General Hospital	Nursing	Kaohsiung Vet Gen Hosp	0	0		1	1					1						1
									Taipei Veterans General Hospital
Intake of Phthalate-Tainted Foods Alters Thyroid Functions in Taiwanese Children	2013	315563800101	Multidisciplinary Sciences	PLoS One	1932-6203	3.534	1	1	Kaohsiung Medical University & Hospital	FM	Kaohsiung Med Univ Hosp	0	0		1	1	1	1																	1
Comparing the outcomes of two strategies for colorectal tumor detection: Policy-promoted screening program versus health promotion service	2013	321405900004	Medicine	Journal of the Chinese Medical Association	1726-4901	0.889	0	0	Shin Kong Wu Ho Su Mem Hosp	GI	Shin Kong Wu Ho Su Mem Hosp	0	0		1	1															1
			General & Internal
Predicting Mortality of Incident Dialysis Patients in Taiwan - A Longitudinal Population-Based Study	2013	318008400118	Multidisciplinary Sciences	PLoS One	1932-6203	3.534	0	0	Kaohsiung Medical University & Hospital	Nephro	Kaohsiung Med Univ Hosp	0	0		0	1	1												1							1
Quality of life (QOL) among community dwelling older people in Taiwan measured by the CASP-19, an index to capture QOL in old age	2013	320584000003	Geriatrics & Gerontology	Archives of Gerontology and Geriatrics	0167-4943	1.525	1	0	Taipei City Hospital	FM	Taipei City Hosp	1	Hong Kong	Asia	1	1	1		1
													England	Europe
Risk factors for single and recurrent falls: A prospective study of falls in community dwelling seniors without cognitive impairment	2013	326057600020	Public	Preventive Medicine	0091-7435	2.932	1	0	Taipei City Hospital	FM	Taipei City Hosp	0	0		1	1	1			1																											1
			Environmental & Occupational Health
			Medicine
			General&Internal
Factors Associated with Falls Among Community-Dwelling Older People in Taiwan	2013	323691500003	Medicine	Annals Academy of Medicine Singapore	0304-4602	1.221	1	0	Taipei City Hospital	FM	Taipei City Hosp	0	0		1	1			1	1																											1
			General&Internal
Second primary cancers in patients with hepatocellular carcinoma: a nationwide cohort study in Taiwan	2013	316228600015	Gastroenterology & Hepatology	Liver International	1478-3223	4.447	0	0	Taipei Veterans General Hospital	GI	Taipei Vet Gen Hosp	0	0		1	1													1		1	1
Metallothionein 1A polymorphisms may influence urine uric acid and N-acetyl-beta-D-glucosaminidase (NAG) excretion in chronic lead-exposed workers	2013	318377500009	Pharmacology & Pharmacy	Toxicology	0300-483X	3.745	1	0	Kaohsiung Medical University & Hospital	FM	Kaohsiung Med Univ Hosp	1	Peoples R China	Asia	1	1	1	1					1
			Toxicology
A comprehensive approach in hospice shared care in Taiwan: Nonelderly patients have more physical, psychosocial and spiritual suffering	2013	323359400006	Medicine	Kaohsiung Journal of Medical Sciences	1607-551X	0.805	1	1	Kaohsiung Medical University & Hospital	FM	Kaohsiung Med Univ Hosp	0	0		0	1	1	1
			Research & Experimental
The joint effect of cigarette smoking and polymorphisms on LRP5, LEPR, near MC4R and SH2B1 genes on metabolic syndrome susceptibility in Taiwan	2013	312435500062	Biochemistry & Molecular Biology	Molecular Biology Reports	0301-4851	1.958	0	1	China Medical University Hospital	Dept Med Res	China Med Univ Hosp	0	0		1	1			1	1	1
A pilot randomized controlled trial to improve geriatric frailty	2012	313489500001	Geriatrics & Gerontology	Bmc Geriatrics	1471-2318	2	0	0	National Taiwan University & Hospital	Geriatrics	Natl Taiwan Univ Hosp	0	0		1	1	1		1		1															1											1
Using published criteria to develop a list of potentially inappropriate medications for elderly patients in Taiwan	2012	312146900003	Pharmacology & Pharmacy	Pharmacoepidemiology and Drug Safety	1053-8569	2.897	0	0	Taipei Veterans General Hospital	Geriatrics	Natl Taiwan Univ Hosp	0	0		1	1					1		1													1
Smoking, Habitual Tea Drinking and Metabolic Syndrome in Elderly Men Living in Rural Community: The Tianliao Old People (TOP) Study 02	2012	305347800024	Multidisciplinary Sciences	PLoS One	1932-6203	3.73	1	1	National Cheng Kung University & Hospital	FM	Natl Cheng Kung Univ Hosp	0	0		1	1	1																			1
Prostaglandin Reductase 2 Modulates ROS-Mediated Cell Death and Tumor Transformation of Gastric Cancer Cells and Is Associated with Higher Mortality in Gastric Cancer Patients	2012	309570100022	Pathology	American Journal of Pathology	0002-9440	4.522	0	0	National Taiwan University & Hospital	Internal Med	Natl Taiwan Univ Hosp	0	0		0	1																				1
Factors Associated with Pneumonia Outcomes: A Nationwide Population-Based Study over the 1997-2008 Period	2012	302869300011	Health Care Sciences & Services	Journal of General Internal Medicine	0884-8734	3.423	0	0	Cardinal Tien Hospital	Healthcare Informat	Ming Chuan Univ	0	0		1	1			1
			Medicine, General & Internal
Asymptomatic bacteriuria among the elderly residents of long-term care facilities in Taiwan	2012	310153100018	Geriatrics & Gerontology	Age and Ageing	0002-0729	3.107	1	1	Taipei Veterans General Hospital	FM	Taipei Vet Gen Hosp	0	0		1	1																		1
									Minist Hlth & Welf, Taipei Hosp
Association of sleep duration and insulin resistance in Taiwanese vegetarians	2012	311091600001	Public, Environmental & Occupational Health	Bmc Public Health	1471-2458	2.076	0	0	Buddhist Tzu Chi General Hospital	Biotechnol	Chia Nan Univ Pharm & Sci	1	Canada	North America	1	1	1
Epidemiology and Predictors of End-stage Renal Disease in Taiwanese Children With Idiopathic Nephrotic Syndrome	2012	311129700006	Public, Environmental & Occupational Health	Journal of Epidemiology	0917-5040	2.113	0	0	Taipei Veterans General Hospital	Pediatric	Taipei Vet Gen Hosp	0	0		0	1																													1
PKC-Dependent Human Monocyte Adhesion Requires AMPK and Syk Activation	2012	306806600033	Multidisciplinary Sciences	PLoS One	1932-6203	3.73	0	0	National Taiwan University & Hospital	pharm	Natl Taiwan Univ Hosp	0	0		1	1																				1
Fatty Liver and Metabolic Syndrome in Nonabdominally Obese Taiwanese Adults	2012	305601300005	Public, Environmental & Occupational Health	Asia-Pacific Journal of Public Health	1010-5395	1.057	1	1	Shin Kong Wu Ho Su Mem Hosp	FM	Shin Kong Wu Ho Su Mem Hosp	0	0		0	0
Effects of environmental noise exposure on 24-h ambulatory vascular properties in adults	2012	309303100016	Environmental Sciences	Environmental Research	0013-9351	3.238	0	0	China Medical University Hospital	Publ Hlth	China Med Univ Hosp	1	Netherlands	Europe	1	1	1
			Public, Environmental & Occupational Health
Noise frequency components and the prevalence of hypertension in workers	2012	301155200010	Environmental Sciences	Science of the Total Environment	0048-9697	3.258	0	0	China Medical University Hospital	Publ Hlth	China Med Univ Hosp	1	Netherlands	Europe	1	1	1
Association of Cyclooxygenase 2 Single-Nucleotide Polymorphisms and Hepatocellular Carcinoma in Taiwan	2012	300916900001	Physiology	Chinese Journal of Physiology	0304-4920	0.748	0	0	China Medical University Hospital	Canc Res	China Med Univ Hosp	0	0		1	1																1
Genetic variation in the carbonyl reductase 3 gene confers risk of type 2 diabetes and insulin resistance: a potential regulator of adipogenesis	2012	305734700013	Genetics & Heredity	Journal of Molecular Medicine-Jmm	0946-2716	4.768	0	0	Buddhist Tzu Chi General Hospital	Internal Med	Natl Taiwan Univ Hosp	1	USA	North America	1	1	1							1									1			1			1
			Medicine, Research & Experimental
The short-term effects of air pollution on adolescent lung function in Taiwan	2012	301686000005	Environmental Sciences	Chemosphere	0045-6535	3.137	0	0	National Taiwan University & Hospital	Hlth Management	I Shou Univ	0	0		1	1	1			1																		1
Association Between Platelet Count and Components of Metabolic Syndrome in Geriatric Taiwanese Males	2012	310714900014	Geriatrics & Gerontology	International Journal of Gerontology	1873-9598	0.235	0	0	Cardinal Tien Hospital	Patho	Tri Serv Gen Hosp	0	0		1	1																	1	1		1
Metabolic syndrome and short-term heart rate variability in adults with intellectual disabilities	2012	309022000002	Rehabilitation	Research in Developmental Disabilities	0891-4222	2.735	1	1	Tri-Service General Hospital	FM	Triserv Gen Hosp	0	0		1	1	1
The incidence of varicella and herpes zoster in Taiwan during a period of increasing varicella vaccine coverage, 2000-2008	2012	304007700020	Public, Environmental & Occupational Health	Epidemiology and Infection	0950-2688	2.867	0	0	Minist Hlth & Welf, Taoyuan Gen Hosp	Inst Stat & Informat	Natl Changhua Univ Educ	0	0		1	1	1		1
			Infectious Diseases
Acute Appendicitis in Patients with End-Stage Renal Disease	2012	308955100017	Gastroenterology & Hepatology	Journal of Gastrointestinal Surgery	1091-255X	2.361	0	0	Taipei Veterans General Hospital	Nephro	Taipei Vet Gen Hosp	0	0		1	1											1		1			1																	1
			Surgery
Atrial Fibrillation and the Risk of Ischemic Stroke Does It Still Matter in Patients With a CHA(2)DS(2)-VASc Score of 0 or 1?	2012	309258900013	Clinical Neurology	Stroke	0039-2499	6.158	0	0	Taipei Veterans General Hospital	CV	Taipei Vet Gen Hosp	0	0		1	1	1							1						1		1
			Peripheral Vascular Disease
The association of alcohol consumption with metabolic syndrome and its individual components: the Taichung community health study	2012	299603200004	Nutrition & Dietetics	Nutrition Research	0271-5317	2.142	1	1	China Medical University Hospital	FM	China Med Univ Hosp	0	0		1	1	1		1	1													1
A comprehensive 4-year survey of adverse drug reactions using a network-based hospital system	2012	310601200006	Pharmacology & Pharmacy	Journal of Clinical Pharmacy and Therapeutics	0269-4727	2.104	1	1	Cathay General Hospital	FM	Cathay Gen Hosp	0	0		0	1
Dynamic computed tomography of angioedema of the small bowel induced by iodinated contrast medium: prompted by coughing-related motion artifact	2012	306159600022	Radiology, Nuclear Medicine & Medical Imaging	Clinical Imaging	0899-7071	0.648	0	0	Minist Hlth & Welf, Taipei Hosp	Radio	Taipei Vet Gen Hosp	0	0		1	1																		1
Frequency and risk factors associated with atherosclerotic plaques in patients with a zero coronary artery calcium score	2012	299719700003	Medicine, General & Internal	Journal of the Chinese Medical Association	1726-4901	0.752	0	0	Minist Hlth & Welf, Taipei Hosp	Radio	Taipei Vet Gen Hosp	0	0		1	1																		1
The Role of Bactericidal/Permeability-Increasing Protein in Men with Chronic Obstructive Pulmonary Disease	2012	302069600013	Respiratory System	Copd-Journal of Chronic Obstructive Pulmonary Disease	1541-2555	2.31	0	0	National Cheng Kung University & Hospital	Chest	Natl Cheng Kung Univ Hosp	0	0		0	1												1
Ethambutol-induced optic neuropathy: a nationwide population-based study from Taiwan	2012	310054100003	Ophthalmology	British Journal of Ophthalmology	0007-1161	2.725	0	0	China Medical University Hospital	Publ Hlth	Natl Taiwan Univ Hosp	0	0		1	1	1
Clinical epidemiology of assessment for willingness-to-pay values associated with gallstone disease: The experience at a teaching hospital in Taiwan	2012	306379900003	Biology	Asia Life Sciences	0117-3375	0.18	1	0	Chang Gung Memorial Hospital	FM	Linkou Chang Gung Mem Hosp	1	Peoples R China	Asia	1	1	1
Identification of psychiatric disorders among human immunodeficiency virus-infected individuals in Taiwan, a nine-year nationwide population-based study	2012	310484200010	Health Policy & Services	Aids Care-Psychological and Socio-Medical Aspects of Aids/Hiv	0954-0121	1.834	0	0	Taipei Veterans General Hospital	Psychi	Taipei Vet Gen Hosp	0	0		0	1							1
			Public, Environmental & Occupational Health
			Psychology, Multidisciplinary
			Respiratory System
			Social Sciences, Biomedical
A Cost-Benefit Analysis of the Outpatient Smoking Cessation Services in Taiwan From a Societal Viewpoint	2012	303334800003	Substance Abuse	Nicotine & Tobacco Research	1462-2203	2.477	0	0	Taipei Veterans General Hospital	Hlth & Welf Policy	Natl Yang Ming Univ	0	0		1	1	1
			Public, Environmental & Occupational Health
Predicting Cause-Specific Mortality of Older Men Living in the Veterans Home by Handgrip Strength and Walking Speed: A 3-Year, Prospective Cohort Study in Taiwan	2012	305948700009	Geriatrics & Gerontology	Journal of the American Medical Directors Association	1525-8610	5.302	1	0	Chi Mei Medical Center	FM	Taipei Vet Gen Hosp	0	0		1	1					1
Antibiotic therapy for necrotizing fasciitis caused by Vibrio vulnificus: retrospective analysis of an 8 year period	2012	299096600031	Infectious Diseases	Journal of Antimicrobial Chemotherapy	0305-7453	5.33	1	1	Chung Shan Medical University & Hospital	FM	Chung Shan Med Univ Hosp	0	0		1	1	1	1												1								1	1
			Microbiology
			Pharmacology & Pharmacy
Gender differences in colorectal cancer during the past 20 years in Taiwan	2012	300507000010	Gastroenterology & Hepatology	International Journal of Colorectal Disease	0179-1958	2.238	0	0	Landseed Hosp	Surgery	Landseed Hosp	0	0		1	1																							1
			Surgery
A high prevalence of autoimmune indices and disorders in primary nummular headache	2012	308381600024	Clinical Neurology	Journal of the Neurological Sciences	0022-510X	2.243	0	0	Antai Tian Sheng Mem Hosp	Neuro	Kaohsiung Chang Gung Mem Hosp	0	0		1	1										1	1
			Neurosciences						Chang Gung Memorial Hospital
Environmental Factors Associated with Overweight and Obesity in Taiwanese Children	2012	310031000009	Public, Environmental & Occupational Health	Paediatric and Perinatal Epidemiology	0269-5022	2.157	0	0	National Taiwan University & Hospital	Publ Hlth	Natl Taiwan Univ	1	Israel	Asia	1	1	1	1
			Obstetrics & Gynecology
			Pediatrics
Detection of patients presenting with adverse drug events in the emergency department	2012	305294100016	Medicine, General & Internal	Internal Medicine Journal	1444-0903	1.823	0	0	National Yang Ming University & Hospital	Emergency & Crit Care Med	Natl Yang Ming Univ	0	0		1	1	1	1			1																	1
Gestational Medication Use, Birth Conditions, and Early Postnatal Exposures for Childhood Asthma	2012	298819900001	Immunology	Clinical & Developmental Immunology	1740-2522	3.064	1	0	Taipei City Hospital	FM	Taipei City Hosp	0	0		1	1	1
Association Between Platelet Count and Components of Metabolic Syndrome in Geriatric Taiwanese Women	2012	310714900011	Geriatrics & Gerontology	International Journal of Gerontology	1873-9598	0.235	0	0	Cardinal Tien Hospital	Patho	Cardinal Tien Hosp	0	0		1	1																	1			1
Two Strategies to Intensify Evidence-based Medicine Education of Undergraduate Students: A Randomised Controlled Trial	2012	301038500002	Medicine, General & Internal	Annals Academy of Medicine Singapore	0304-4602	1.362	0	0	National Taiwan University & Hospital	CV	Taipei Vet Gen Hosp	0	0		1	1	1							1													1
Patients with chronic kidney disease are at an elevated risk of dementia: A population-based cohort study in Taiwan	2012	311687200001	Urology & Nephrology	Bmc Nephrology	1471-2369	1.644	1	0	China Medical University Hospital	FM	China Med Univ Hosp	0	0		0	1	1		1
Risk of esophagus cancer in diabetes mellitus: a population-based case-control study in Taiwan	2012	312870600001	Gastroenterology & Hepatology	Bmc Gastroenterology	1471-230X	2.11	1	0	China Medical University Hospital	FM	China Med Univ Hosp	0	0		0	1	1		1
A study on the sleep quality of incoming university students	2012	308768100015	Psychiatry	Psychiatry Research	0165-1781	2.456	0	1	National Cheng Kung University & Hospital	Psychi	Natl Cheng Kung Univ Hosp	0	0		0	1							1
Factors Affecting the Improvement of Quality of Dying of Terminally Ill Patients with Cancer through Palliative Care: A Ten-Year Experience	2012	307095200006	Health Care Sciences & Services	Journal of Palliative Medicine	1096-6218	1.891	1	1	National Taiwan University & Hospital	FM	Natl Taiwan Univ Hosp	1	USA	North America	1	1
Breast Cancers Detected by Breast MRI Screening and Ultrasound in Asymptomatic Asian Women: 8 Years of Experience in Taiwan	2012	301774000005	Oncology	Oncology	0030-2414	2.165	0	0	National Yang Ming University & Hospital	Radio	Natl Yang Ming Univ	1	USA	North America	1	1												1						1
Anxiety, depression and quality of life (QoL) in patients with chronic dizziness	2012	296542200024	Geriatrics & Gerontology	Archives of Gerontology and Geriatrics	0167-4943	1.704	0	0	Taipei Veterans General Hospital	Rehabilitation	Yuan Shan Vet Hosp	0	0		1	1					1
Oral alendronate use and risk of cancer in postmenopausal women with osteoporosis: A nationwide study	2012	307889000012	Endocrinology & Metabolism	Journal of Bone and Mineral Research	0884-0431	6.128	0	0	Taipei Veterans General Hospital	CV	Zhudong Vet Hosp	0	0		1	1								1
The risky body mass index ranges for significant hepatitis B viral load: A campus-based study	2012	306956900004	Endocrinology & Metabolism	Obesity Research & Clinical Practice	1871-403X	0.506	1	1	National Taiwan University & Hospital	FM	Natl Taiwan Univ Hosp	0	0		1	1
			Nutrition & Dietetics
Lipid accumulation product: a simple and accurate index for predicting metabolic syndrome in Taiwanese people aged 50 and over	2012	311604200001	Cardiac & Cardiovascular Systems	Bmc Cardiovascular Disorders	1471-2261	1.457	1	0	Buddhist Tzu Chi General Hospital	FM	Buddhist Dalin Tzu Chi Gen Hosp	0	0		1	1	1
Survival benefits of metabolic syndrome among older men aged 75 years and over in Taiwan	2012	305350800002	Geriatrics & Gerontology	Journal of Nutrition Health & Aging	1279-7707	2.394	1	0	Taipei Veterans General Hospital	FM	Taipei Vet Gen Hosp	0	0		1	1					1																										1
			Nutrition & Dietetics
Heat Shock Protein 70 Gene Polymorphisms in Sudden Sensorineural Hearing Loss	2012	308610600004	Audiology & Speech-Language Pathology	Audiology and Neuro-Otology	1420-3030	2.318	0	0	Kaohsiung Medical University & Hospital	ENT	Kaohsiung Med Univ Hosp	0	0		0	1	1	1
			Neurosciences
			Otorhinolaryngology
Usability Evaluation of Mobile Medical Treatment Carts: Another Explanation by Information Engineers	2012	303826000029	Health Care Sciences & Services	Journal of Medical Systems	0148-5598	1.783	0	0	National Taiwan University & Hospital	Elect Engn	Natl Taiwan Univ Hosp	0	0		1	1
			Medical Informatics
Effect of Fracture Type on Health-Related Quality of Life Among Older Women in Taiwan	2012	301027600021	Rehabilitation	Archives of Physical Medicine and Rehabilitation	0003-9993	2.358	0	0	Taipei Medical University & Hospital	Publ Hlth	Taipei Med Univ Hosp	0	0		1	1												1
			Sport Sciences						Mackay Memoral Hospital
Establishing a community-run GP-supervised self-care program for minor illnesses in remote areas in Taiwan: an observational study	2012	304529500010	Primary Health Care	Family Practice	0263-2136	1.828	1	1	Buddhist Tzu Chi General Hospital	FM	Buddhist Tzu Chi Gen Hosp	0	0		0	1	1
			Medicine, General & Internal
Carbon monoxide: An old poison with a new way of poisoning	2012	309799500008	Medicine, General & Internal	Journal of the Formosan Medical Association	0929-6646	1	1	0	Armed Forces General Hospital	FM	Hualien Armed Forces Gen Hosp	0	0		1	1	1	1
Correlation between body composition and risk factors for cardiovascular disease and metabolic syndrome	2012	307384300004	Biochemistry & Molecular Biology	Biofactors	0951-6433	3.088	1	0	Chang Gung Memorial Hospital	FM	Chang Gung Mem Hosp	0	0		1	1		1																			1
			Endocrinology & Metabolism
Characteristic dermoscopic features of primary cutaneous amyloidosis: a study of 35 cases	2012	308130900015	Dermatology	British Journal of Dermatology	0007-0963	3.759	0	1	National Yang Ming University & Hospital	Derma	Taipei Vet Gen Hosp	0	0		1	1
PP2A mediates diosmin p53 activation to block HA22T cell proliferation and tumor growth in xenografted nude mice through PI3K-Akt-MDM2 signaling suppression	2012	304572000081	Food Science & Technology	Food and Chemical Toxicology	0278-6915	3.01	0	0	China Medical University Hospital	NA	China Med Univ Hosp	0	0		1	1																									1
			Toxicology
Diosmin induces cell apoptosis through protein phosphatase 2A activation in HA22T human hepatocellular carcinoma cells and blocks tumour growth in xenografted nude mice	2012	301513100060	Chemistry, Applied	Food Chemistry	0308-8146	3.334	0	0	China Medical University Hospital	中醫	China Med Univ Hosp	0	0		1	1				1																					1
			Food Science & Technology
			Nutrition & Dietetics
Increased incidence of metabolic syndrome in older men with high normotension	2012	310884600006	Endocrinology & Metabolism	Aging Male	1368-5538	1.711	0	1	Cardinal Tien Hospital	META	Buddhist Tzu Chi Gen Hosp	0	0		1	1																	1			1
			Urology & Nephrology
Drinking Deep Seawater Decreases Serum Total and Low-Density Lipoprotein-Cholesterol in Hypercholesterolemic Subjects	2012	304839400005	Chemistry, Medicinal	Journal of Medicinal Food	1096-620X	1.642	0	0	Cardinal Tien Hospital	Nutrition	Fu Jen Catholic Univ	0	0		0	1
			Food Science & Technology
			Nutrition & Dietetics
Certain bio-psychosocial-spiritual problems associated with dyspnea among advanced cancer patients in Taiwan	2012	306129600020	Oncology	Supportive Care in Cancer	0941-4355	2.649	1	1	China Medical University Hospital	FM	China Med Univ Hosp	0	0		1	1				1
			Health Care Sciences & Services
			Rehabilitation
Anti-atherosclerotic action of Ger-Gen-Chyn-Lian-Tang and AMPK-dependent lipid lowering effect in hepatocytes	2012	305850500025	Plant Sciences	Journal of Ethnopharmacology	0378-8741	2.755	0	0	National Taiwan University & Hospital	Internal Med	Tao Yuan Gen Hosp	0	0		1	1
			Chemistry, Medicinal
			Integrative & Complementary Medicine
			Pharmacology & Pharmacy
Inhibition of lipopolysaccharide-induced inducible nitric oxide synthase expression by endoplasmic reticulum stress	2012	309309100021	Cell Biology	Cellular Signalling	0898-6568	4.304	0	0	National Taiwan University & Hospital	Pharm	Natl Taiwan Univ Hosp	0	0		1	1																				1
Psychoactive Substance Use and the Risk of Motor Vehicle Crash Injuries in Southern Taiwan	2012	300663600004	Public, Environmental & Occupational Health	Prevention Science	1389-4986	2.566	0	0	Wei Gong Mem Hosp	Intens Care	Chi Mei Med Ctr	0	0		1	1	1																				1	1
An investigation on illness perception and adherence among hypertensive patients	2012	308618500006	Medicine, Research & Experimental	Kaohsiung Journal of Medical Sciences	1607-551X	0.502	1	1	Far Eastern Memoral Hospital	FM	Far Eastern Mem Hosp	0	0		1	1	1
Melamine Induces Human Renal Proximal Tubular Cell Injury via Transforming Growth Factor- and Oxidative Stress	2012	310163200003	Toxicology	Toxicological Sciences	1096-6080	4.32	0	1	Kaohsiung Medical University & Hospital	Genet	Kaohsiung Med Univ	0	0		1	1	1	1																									1
HbA(1c) variability is associated with microalbuminuria development in type 2 diabetes: a 7-year prospective cohort study	2012	310381800004	Endocrinology & Metabolism	Diabetologia	0012-186X	6.487	0	0	National Cheng Kung University & Hospital	Hlth Serv Adm	China Med Univ Hosp	0	0		1	1	1			1									1
Penile Veins Are the Principal Component in Erectile Rigidity: A Study of Penile Venous Stripping on Defrosted Human Cadavers	2012	312113200017	Andrology	Journal of Andrology	0196-3635	2.532	0	0	National Taiwan University & Hospital	GU	Natl Taiwan Univ Hosp	1	Australia	Oceania	1	1																											1
Gastroesophageal Reflux Disease and Atrial Fibrillation: A Nationwide Population-Based Study	2012	309995100137	Multidisciplinary Sciences	PLoS One	1932-6203	3.73	0	0	Taipei Veterans General Hospital	CV	Taipei Vet Gen Hosp	0	0		1	1								1							1
Comparison of a Chinese Herbal Medicine (CCH1) and Lactulose as First-Line Treatment of Constipation in Long-Term Care: A Randomized, Double-Blind, Double-Dummy, and Placebo-Controlled Trial	2012	302604200001	Integrative & Complementary Medicine	Evidence-Based Complementary and Alternative Medicine	1741-427X	1.722	1	0	National Taiwan University & Hospital	FM	Natl Taiwan Univ Hosp	0	0		1	1			1												1
Urinary total arsenic and 8-hydroxydeoxyguanosine are associated with renal cell carcinoma in an area without obvious arsenic exposure	2012	306888800016	Pharmacology & Pharmacy	Toxicology and Applied Pharmacology	0041-008X	3.975	0	0	Taipei Medical University & Hospital	GU	Natl Taiwan Univ Hosp	0	0		1	1	1																										1
			Toxicology
Family experience with difficult decisions in end-of-life care	2012	305889300014	Oncology	Psycho-Oncology	1057-9249	3.506	1	0	National Taiwan University & Hospital	FM	Natl Taiwan Univ Hosp	0	0		1	1
			Psychology
			Psychology, Multidisciplinary
			Social Sciences, Biomedical
Deterioration of cutaneous microcirculatory status of Kawasaki disease	2012	303449300014	Rheumatology	Clinical Rheumatology	0770-3198	2.037	0	1	Yuans Gen Hosp	Radiat Oncol	Kaohsiung Med Univ	1	USA	North America	1	1	1																															1
Diacerein: A potential therapeutic drug for periodontal disease	2012	306770700011	Medicine, Research & Experimental	Medical Hypotheses	0306-9877	1.054	0	0	Tri-Service General Hospital	Dent	Tri Serv Gen Hosp	0	0		1	1
Occupational risks of esophageal cancer in Taiwanese men	2012	313471300004	Medicine, Research & Experimental	Kaohsiung Journal of Medical Sciences	1607-551X	0.502	0	1	Kaohsiung Medical University & Hospital	Publ Hlth	Kaohsiung Med Univ	0	0		1	1	1														1
Significant associations of prostate-specific antigen nadir and time to prostate-specific antigen nadir with survival in prostate cancer patients treated with androgen-deprivation therapy	2012	299840800006	Endocrinology & Metabolism	Aging Male	1368-5538	1.711	0	0	Kaohsiung Medical University & Hospital	GU	Kaohsiung Med Univ Hosp	1	Peoples R China	Asia	1	1		1																									1
			Urology & Nephrology										USA	North America
The Association between Impaired Glucose Tolerance and Self-Reported Sleep Quality in a Chinese Population	2012	209002400006	Endocrinology & Metabolism	Canadian Journal of Diabetes	1499-2671	0.458	1	1	National Cheng Kung University & Hospital	FM	Natl Cheng Kung Univ Hosp	0	0		0	1																	1
TRAFFIC AIR POLLUTION AND RISK OF DEATH FROM OVARIAN CANCER IN TAIWAN: FINE PARTICULATE MATTER (PM2.5) AS A PROXY MARKER	2012	302184800004	Environmental Sciences	Journal of Toxicology and Environmental Health-Part a-Current Issues	1528-7394	1.733	1	0	Kaohsiung Veterans General Hospital	FM	Kaohsiung Vet Gen Hosp	0	0		1	1	1	1																												1
			Public, Environmental & Occupational Health
			Toxicology
Traffic Air Pollution and Risk of Death from Breast Cancer in Taiwan: Fine Particulate Matter (PM2.5) as a Proxy Marker	2012	301281200014	Environmental Sciences	Aerosol and Air Quality Research	1680-8584	0	1	0	Kaohsiung Veterans General Hospital	FM	Kaohsiung Vet Gen Hosp	0	0		1	1	1	1		1
Synergistic effect of gamma glutamyltransferase and obesity on metabolic syndrome, independent of hepatic steatosis	2012	312232400008	Public, Environmental & Occupational Health	Annals of Epidemiology	1047-2797	2.479	1	1	Shin Kong Wu Ho Su Mem Hosp	FM	Shin Kong Wu Ho Su Mem Hosp	0	0		1	1		1
Gene-environment interaction between angiotensinogen and chronic exposure to occupational noise contribute to hypertension	2012	301294200003	Public, Environmental & Occupational Health	Occupational and Environmental Medicine	1351-0711	3.215	0	0	China Medical University Hospital	FM	China Med Univ Hosp	0	0		1	1	1	1
Cancer risk in patients with allergic rhinitis, asthma and atopic dermatitis: A nationwide cohort study in Taiwan	2012	298601500019	Oncology	International Journal of Cancer	0020-7136	6.198	0	0	Taipei Veterans General Hospital	Derma	Taipei Vet Gen Hosp	0	0		1	1
Prevalence of metabolically healthy obesity and its impacts on incidences of hypertension, diabetes and the metabolic syndrome in Taiwan	2012	303967800009	Nutrition & Dietetics	Asia Pacific Journal of Clinical Nutrition	0964-7058	1.055	1	0	Mackay Memoral Hospital	FM	Mackay Mem Hosp	0	0		1	1	1
Effects of Extract from Solid-State Fermented Cordyceps sinensis on Type 2 Diabetes Mellitus	2012	301376700001	Integrative & Complementary Medicine	Evidence-Based Complementary and Alternative Medicine	1741-427X	1.722	0	0	Chi Mei Medical Center	Nephro	Chi Mei Med Ctr	0	0		1	1													1
Intermediate bioelectrolyte changes after phospho-soda or polyethylene glycol precolonoscopic laxatives in a population undergoing health examinations	2012	300421300045	transplantation	Nephrology Dialysis Transplantation	0931-0509	3.371	0	1	Chi Mei Medical Center	Nephro	Chi Mei Med Ctr	0	0		1	1													1		1							1
			Urology & Nephrology
Characteristics of comorbidities and costs among patients who died from systemic lupus erythematosus in Taiwan	2012		Medicine	Archives of Medical Science	1734-1922	1.067	1	0	Taipei Veterans General Hospital	FM	Taipei Vet Gen Hosp	0	0		0	1										1
			General&Internal
Impact of hospice care on end-of-life hospitalization of elderly patients with lung cancer in Taiwan	2012	305596000006	Medicine	Journal of the Chinese Medical Association	1726-4901	0.752	0	1	Taipei Veterans General Hospital	FM	Taipei Vet Gen Hosp	0	0		0	0				1
			General&Internal
Associations between serum total bilirubin levels and functional dependence in the elderly	2012	311377500006	Medicine	Internal Medicine Journal	1444-0903	1.823	1	1	Tri-Service General Hospital	FM	Tri Serv Gen Hosp	0	0		1	1	1
			General&Internal
Subjective quality of life and suicidal behavior among Taiwanese schizophrenia patients	2012	301786400003	Psychiatry	Social Psychiatry and Psychiatric Epidemiology	0933-7954	2.861	0	0	Armed Forces General Hospital	Physiology	Songshan Armed Forces Gen Hosp	0	0		0	1
Psychometric properties of the Taiwanese version of the Illness Concept Scale: relation of health beliefs to psychopathology and medication compliance	2012	301786400010	Psychiatry	Social Psychiatry and Psychiatric Epidemiology	0933-7954	2.861	0	0	Armed Forces General Hospital	Physiology	Songshan Armed Forces Gen Hosp	0	0		0	0							1
The psychometric properties of the Peters et al. Delusions Inventory (PDI) in Taiwan: reliability, validity, and utility	2012	306546800003	Psychiatry	Social Psychiatry and Psychiatric Epidemiology	0933-7954	2.861	0	0	Armed Forces General Hospital	Psychi	Songshan Armed Forces Gen Hosp	0	0		0	0							1
Medical treatment for a fish bone-induced Heal micro-perforation: A case report	2012	311195200023	Gastroenterology & Hepatology	World Journal of Gastroenterology	1007-9327	2.547	0	0	Kang Ning Gen Hosp	Emergency & Crit Care Med	Kang Ning Gen Hosp	0	0		0	1																		1			1		1
Parenting Confidence and Needs for Parents of Newborns in Taiwan	2012	307676500005	Pediatrics	Iranian Journal of Pediatrics	2008-2142	0.258	0	1	Minist Hlth & Welf, Taichung Hospital	Nursing	Chung Shan Med Univ Hosp	0	0		1	1
Safety and Efficacy of Tien-Hsien Liquid Practical in Patients with Refractory Metastatic Breast Cancer: A Randomized, Double-Blind, Placebo-Controlled, Parallel-Group, Phase IIa Trial	2012	303749200001	Integrative & Complementary Medicine	Evidence-Based Complementary and Alternative Medicine	1741-427X	1.722	0	0	National Taiwan University & Hospital	GS	Natl Taiwan Univ Hosp	0	0		1	1																							1
Effects of music intervention with nursing presence and recorded music on psycho-physiological indices of cancer patient caregivers	2012	300504000017	Nursing	Journal of Clinical Nursing	0962-1067	1.316	0	0	Buddhist Tzu Chi General Hospital	Nursing	Buddhist Tzu Chi Gen Hosp	0	0		1	1
Systolic Blood Pressure as an Independent Predictor of Metabolic Syndrome in Male Adolescents	2012	305662700003	Cardiac & Cardiovascular Systems	Acta Cardiologica Sinica	1011-6842	0.667	0	0	Cardinal Tien Hospital	Internal Med	Cardinal Tien Hosp	0	0		0	1																				1
Multi-source evaluation of interpersonal and communication skills of family medicine residents	2012	WOS:000310740900009	Education & Educational Research	Advances in Health Sciences Education	1382-4996	2.061	1	1	National Taiwan University & Hospital	FM	Natl Taiwan Univ	0	0		0	1
			Education
			Scientific Disciplines
			Health Care Sciences & Services
Risk of Hepatocellular Carcinoma in Diabetic Patients and Risk Reduction Associated With Anti-Diabetic Therapy: A Population-Based Cohort Study	2012	WOS:000300573000008	Gastroenterology & Hepatology	American Journal of Gastroenterology	0002-9270	7.553	1	0	China Medical University Hospital	FM	China Med Univ Hosp	0	0		1	1	1			1																1
Association of Hepatitis C Virus Infection With Risk of ESRD: A Population-Based Study	2012	WOS:000309109400012	Urology & Nephrology	American Journal of Kidney Diseases	0272-6386	5.294	1	0	Taipei Medical University & Hospital	FM	Taipei Med Univ Hosp	0	0		1	1	1			1
Variation of Fasting Plasma Glucose: A Predictor of Mortality in Patients with Type 2 Diabetes	2012	WOS:000302120400027	Medicine	American Journal of Medicine	0002-9343	4.768	1	0	China Medical University Hospital	FM	China Med Univ	0	0		1	1	1		1	1													1
			General&Internal
Mesenteric Ischemia in Patients with End-Stage Renal Disease: A Nationwide Longitudinal Study	2012	WOS:000305812100002	Urology & Nephrology	American Journal of Nephrology	0250-8095	2.623	0	0	Taipei Veterans General Hospital	Nephro	Taipei Vet Gen Hosp	0	0		1	1													1
Low Estimated Glomerular Filtration Rate Is a Major Determinant of Low Ankle-Brachial Index and Toe-Brachial Index in Type 2 Diabetes	2012	WOS:000297652000010	Peripheral Vascular Disease	Angiology	0003-3197	1.647	0	0	Taoyuan General Hospital	Meta	Taichung Hosp	0	0		1	1	1		1														1
Outbreak of Klebsiella pneumoniae Carbapenemase-2-Producing K. pneumoniae Sequence Type 11 in Taiwan in 2011	2012	WOS:000308807900004	Microbiology	Antimicrobial Agents and Chemotherapy	0066-4804	4.565	0	0	Minist Hlth & Welf, Taichung Hospital	Infection	Mackay Mem Hosp	0	0		1	1														1						1
			Pharmacology & Pharmacy
Real-Time PCR Analysis of the Intestinal Microbiotas in Peritoneal Dialysis Patients	2012	WOS:000299918600025	Biotechnology & Applied Microbiology	Applied and Environmental Microbiology	0099-2240	3.67	0	0	China Medical University Hospital	Nephro	China Med Univ Hosp	0	0		1	1													1		1					1
			Microbiology
Social support and mobility limitation as modifiable predictors of improvement in depressive symptoms in the elderly: Results of a national longitudinal study	2012	WOS:000308667900003	Geriatrics & Gerontology	Archives of Gerontology and Geriatrics	0167-4943	1.704	0	0	Minist Hlth & Welf, Taichung Hospital	Psychi	Chung Shan Med Univ Hosp	0	0		1	1	1						1
									Chung Shan Medical University & Hospital
Dose-dependent effect of rehabilitation in functional recovery of older patients in the post-acute care unit	2012	WOS:000302959400007	Geriatrics & Gerontology	Archives of Gerontology and Geriatrics	0167-4943	1.704	1	0	Taipei Veterans General Hospital	FM	Taipei Vet Gen Hosp	0	0		1	1					1
In addition to malnutrition and renal function impairment, anemia is associated with hyponatremia in the elderly	2012	WOS:000304247300017	Geriatrics & Gerontology	Archives of Gerontology and Geriatrics	0167-4943	1.704	1	1	China Medical University Hospital	FM	China Med Univ Hosp	0	0		1	1				1
Uric acid level as a risk marker for metabolic syndrome: A Chinese cohort study	2012	WOS:000299319100038	Peripheral Vascular Disease	Atherosclerosis	0021-9150	3.706	0	0	Mackay Memoral Hospital	Dept Hlth Business Adm	Meiho Univ	0	0		1	1	1																			1			1
Utilization pattern of traditional Chinese medicine for liver cancer patients in Taiwan	2012	WOS:000315094300001	Integrative & Complementary Medicine	Bmc Complementary and Alternative Medicine	1472-6882	2.082	0	0	China Medical University Hospital	Chinese Medicine	China Med Univ	0	0		1	1			1	1
Factors and symptoms associated with work stress and health-promoting lifestyles among hospital staff: a pilot study in Taiwan	2012	WOS:000311894900001	Health Care Sciences & Services	Bmc Health Services Research	1472-6963	1.773	1	0	Mackay Memoral Hospital	FM	Mackay Mem Hosp	0	0		0	1				1
Quality of life predicts survival in patients with non-small cell lung cancer	2012	WOS:000315042400001	Public, Environmental & Occupational Health	Bmc Public Health	1471-2458	2.076	0	1	China Medical University Hospital	Publ Hlth	China Med Univ	0	0		1	1	1			1			1													1
Pulmonary function, respiratory symptoms, and dust exposures among workers engaged in early manufacturing processes of tea: a cohort study	2012	WOS:000302469900001	Public, Environmental & Occupational Health	Bmc Public Health	1471-2458	2.076	1	0	St Martin De Porres Hosp	FM	St Martin De Porres Hosp	0	0		1	1	1	1
Chewing areca nut increases the risk of coronary artery disease in Taiwanese men: a case-control study	2012	WOS:000305154600001	Public, Environmental & Occupational Health	Bmc Public Health	1471-2458	2.076	0	0	Kaohsiung Medical University & Hospital	CV	Kaohsiung Med Univ Hosp	0	0		1	1	1	1						1												1
Central serous chorioretinopathy and risk of ischaemic stroke: a population-based cohort study	2012	WOS:000311422600009	Ophthalmology	British Journal of Ophthalmology	0007-1161	2.725	0	0	Taipei Veterans General Hospital	Oph	Natl Yang Ming Univ Hosp	0	0		1	1	1			1				1
Association between antidepressant resistance in unipolar depression and subsequent bipolar disorder: cohort study	2012	WOS:000299805000011	Psychiatry	British Journal of Psychiatry	0007-1250	6.606	0	0	Taipei Veterans General Hospital	Psychi	Taipei Vet Gen Hosp	0	0		0	1							1
Severity score for predicting pneumonia in inhalation injury patients	2012	WOS:000301621500008	Critical Care Medicine	Burns	0305-4179	1.799	0	0	Taipei City Hospital	PS	Taipei Med Univ Hosp	0	0		1	1								1																1
			Dermatology
			Surgery
The role of the chemical burns caused by hydroxide ion in the toxicity of dermal exposure to tetramethylammonium ion in a rat model	2012	WOS:000310410300014	Critical Care Medicine	Burns	0305-4179	1.799	0	0	Chi Mei Medical Center	Publ Hlth	Natl Cheng Kung Univ	0	0		1	1	1	1
			Dermatology
			Surgery
Procalcitonin as a Biomarker for Bacterial Infections in Patients With Liver Cirrhosis in the Emergency Department	2011	WOS:000287248200004	Emergency Medicine	Academic Emergency Medicine	1069-6563	1.861	0	0	Chang Gung Memorial Hospital	Emergency & Crit Care Med	Chang Gung Mem Hosp	0	0		1	1																					1
Rheumatoid Factor is a Strong Risk Factor for Coronary Artery Disease in Men with Metabolic Syndrome	2010	WOS:000279377000004	Cardiac & Cardiovascular Systems	Acta Cardiologica Sinica	1011-6842	0.378	0	0	Pu Li Vet Hosp	CV	Armed Forces Taichung Gen Hosp	0	0		1	1	1			1				1
Positive Effect of Modified Goeckerman Regimen on Quality of Life and Psychosocial Distress in Moderate and Severe Psoriasis	2011	WOS:000292432600013	Dermatology	Acta Dermato-Venereologica	0001-5555	3.176	0	0	E Da Hospital	Derma	Chang Gung Mem Hosp	0	0		1	1
Prevalence of Atopic Dermatitis, Allergic Rhinitis and Asthma in Taiwan A National Study 2000 to 2007	2010	WOS:000284916400004	Dermatology	Acta Dermato-Venereologica	0001-5555	3.176	0	0	Taipei Veterans General Hospital	FM	Taipei Vet Gen Hosp	0	0		1	1	1
Deliberate self-harm by Taiwanese adolescents	2011	WOS:000296421300006	Pediatrics	Acta Paediatrica	0803-5253	2.073	1	0	Far Eastern Memoral Hospital	FM	Far Eastern Mem Hosp	0	0		1	1	1
Analysis of Medical Litigation Among Patients with Medical Disputes in Cosmetic Surgery in Taiwan	2011	WOS:000295844000012	Surgery	Aesthetic Plastic Surgery	0364-216X	1.407	0	0	Taipei Medical University & Hospital	Publ Hlth	Taipei Med Univ	0	0		1	1	1						1																1	1
Risk factors of new onset diabetes mellitus among elderly Chinese in rural Taiwan	2010	WOS:000272922800024	Geriatrics & Gerontology	Age and Ageing	0002-0729	2.719	1	1	Taipei Veterans General Hospital	FM	Taipei Vet Gen Hosp	0	0		0	1	1
Angiotensin II Receptor Blockers and Risk of Cancer in Patients With Systemic Hypertension	2011	WOS:000289275500012	Cardiac & Cardiovascular Systems	American Journal of Cardiology	0002-9149	3.368	0	0	Taipei Veterans General Hospital	CV	Taipei Vet Gen Hosp	1	Germany	Europe	1	1	1		1	1				1
Risk of Adverse Outcomes in Taiwan Associated With Concomitant Use of Clopidogrel and Proton Pump Inhibitors in Patients Who Received Percutaneous Coronary Intervention	2010	WOS:000279378100010	Cardiac & Cardiovascular Systems	American Journal of Cardiology	0002-9149	3.601	0	0	Taipei Veterans General Hospital	CV	Taipei Vet Gen Hosp	1	Germany	Europe	1	1	1		1	1				1
Variations of Brain Activities of Acupuncture to TE5 of Left Hand in Normal Subjects	2011	WOS:000292205300004	Integrative & Complementary Medicine	American Journal of Chinese Medicine	0192-415X	1.979	0	0	National Taiwan University & Hospital	中醫	China Med Univ	0	0		1	1																				1
			Medicine
			General&Internal
Bajiaolian poisoning-a poisoning with high misdiagnostic rate	2010	WOS:000278671800016	Emergency Medicine	American Journal of Emergency Medicine	0735-6757	1.994	0	0	Kaohsiung Veterans General Hospital	Emergency & Crit Care Med	Fooyin Univ Hosp	0	0		1	1			1																		1
Risk of Acute Pancreatitis in Type 2 Diabetes and Risk Reduction on Anti-Diabetic Drugs: A Population-Based Cohort Study in Taiwan	2011	WOS:000294685700014	Gastroenterology & Hepatology	American Journal of Gastroenterology	0002-9270	7.282	1	0	China Medical University Hospital	FM	China Med Univ & Hosp	0	0		1	1	1			1																1
Waning immunity and booster responses in nursing and medical technology students who had received plasma-derived or recombinant hepatitis B vaccine during infancy	2011	WOS:000291050700009	Infectious Diseases	American Journal of Infection Control	0196-6553	2.396	0	0	Fooyin Univ Hosp	Dept Lab Med	Fooyin Univ Hosp	0	0		1	1	1	1
Altered Cardiac Autonomic Function May Precede Insulin Resistance in Metabolic Syndrome	2010	WOS:000277289900011	Medicine	American Journal of Medicine	0002-9343	5.115	1	1	National Cheng Kung University & Hospital	FM	Natl Cheng Kung Univ Hosp	0	0		0	1			1				1						1
			General&Internal
Pyogenic Liver Abscess as the Initial Manifestation of Underlying Hepatocellular Carcinoma	2011	WOS:000297405100023	Medicine	American Journal of Medicine	0002-9343	5.43	0	0	Taipei Veterans General Hospital	Infection	Taipei Vet Gen Hosp	0	0		1	1														1		1
			General&Internal
Adipose proinflammatory cytokine expression through sympathetic system is associated with hyperglycemia and insulin resistance in a rat ischemic stroke model	2011	WOS:000285711200018	Endocrinology & Metabolism	American Journal of Physiology-Endocrinology and Metabolism	0193-1849	4.746	1	0	Taichung Veterans General Hospital	FM	Taichung Vet Gen Hosp	0	0		1	1																	1
			Physiology
Visfatin-a proinflammatory adipokine-in gallstone disease	2010	WOS:000276977000005	Surgery	American Journal of Surgery	0002-9610	2.6	0	0	Taipei Medical University & Hospital	Surgery	Kaohsiung Municipal Hsiao Kang Hosp	0	0		1	1	1														1								1
Pathologic Evaluation of Gallbladder in Patients Who Underwent Cholecystectomy and Hepatic Resection for Hepatocellular Carcinoma	2011	WOS:000288739600015	Medicine	American Journal of the Medical Sciences	0002-9629	1.391	1	1	China Medical University Hospital	FM	China Med Univ Hosp	0	0		0	0
			General & Internal
Risk Factors of Recurrence After Curative Resection of Hepatocellular Carcinoma in Taiwan	2011	WOS:000288739600014	Medicine	American Journal of the Medical Sciences	0002-9629	1.391	1	1	China Medical University Hospital	FM	China Med Univ Hosp	0	0		1	1																				1
			General & Internal
Diversity of Hepatitis C Virus Genotypes Among Intravenous Heroin Users in Taiwan	2011	WOS:000286828400007	Medicine	American Journal of the Medical Sciences	0002-9629	1.391	1	0	China Medical University Hospital	Internal Med	Taichung Tzu Chi Gen Hosp	0	0		1	1																				1
			General & Internal
Peptostreptococcus anaerobius Infective Endocarditis Complicated by Spleen Infarction	2011	WOS:000293212200015	Medicine	American Journal of the Medical Sciences	0002-9629	1.391	0	0	Kaohsiung Medical University & Hospital	Infection	Kaohsiung Med Univ Hosp	0	0		0	1														1
			General & Internal
Rubella Seroepidemiology and Catch-up Immunization among Pregnant Women in Taiwan: Comparison between Women Born in Taiwan and Immigrants from Six Countries in Asia	2010	WOS:000273367400009	Public	American Journal of Tropical Medicine and Hygiene	0002-9637	2.446	0	0	Fooyin Univ Hosp	Dept Lab Med	Dept Lab Med	0	0		1	1	1
			Environmental & Occupational Health
			Tropical Medicine
Capillary Electrophoretic Determination of Selected Phenolic Compounds in Humic Substances of Well Waters and Fertilizers	2010	WOS:000277658300007	Chemistry	Analytical Sciences	0910-6340	1.465	1	0	E Da Hospital	FM	E Da Hospital	0	0		1	1
			Analytical
Thrombocytopenia and its Related Factors: A Hospital-based, Cross-sectional Study	2010	WOS:000274746200003	Medicine	Annals Academy of Medicine Singapore	0304-4602	1.203	1	0	China Medical University Hospital	FM	China Med Univ Hosp	0	0		1	1																				1
			General & Internal						Jen Ai Clin
									Private Clin
Risk factors and predictors of non-alcoholic fatty liver disease in Taiwan	2011	WOS:000290636300002	Gastroenterology & Hepatology	Annals of Hepatology	1665-2681	1.811	1	1	Taipei Medical University & Hospital	FM	Shuang Ho Hosp	0	0		1	1	1
Effectiveness of community hospital-based post-acute care on functional recovery and 12-month mortality in older patients: A prospective cohort study	2010	WOS:000284116100009	Medicine	Annals of Medicine	0785-3890	4.323	1	0	Taipei Veterans General Hospital	FM	Taipei Vet Gen Hosp	0	0		1	1					1					1
			General&Internal
Polymorphism in Epidermal Growth Factor Receptor Intron 1 Predicts Prognosis of Patients with Esophageal Cancer after Chemoradiation and Surgery	2011	WOS:000291652000037	Oncology	Annals of Surgical Oncology	1068-9265	4.166	0	0	Grad Inst Occupat Safety & Hlth	Surgery	Natl Taiwan Univ Hosp	0	0		1	1	1															1							1
			Surgery
Molecular Characterization of Invasive Subpopulations from an Esophageal Squamous Cell Carcinoma Cell Line	2010	WOS:000276561300004	Oncology	Anticancer Research	0250-7005	1.658	0	1	Kaohsiung Medical University & Hospital	Grad Inst Med	Kaohsiung Med Univ	0	0		1	1		1													1											1	1
Houttuynia cordata Thunb Extract Inhibits Cell Growth and Induces Apoptosis in Human Primary Colorectal Cancer Cells	2010	WOS:000283009400046	Oncology	Anticancer Research	0250-7005	1.658	0	0	Taichung Veterans General Hospital	Surgery	Beigang Hosp	1	Japan	Asia	1	1																							1									1
Significant Association of Caveolin-1 (CAV1) Genotypes with Breast Cancer in Taiwan	2011	WOS:000295667700056	Oncology	Anticancer Research	0250-7005	1.725	0	0	China Medical University Hospital	Surgery	China Med Univ Hosp	0	0		0	1																							1
Association between Ataxia Telangiectasia Mutated Gene Polymorphisms and Breast Cancer in Taiwanese Females	2010	WOS:000287018100063	Oncology	Anticancer Research	0250-7005	1.658	0	0	China Medical University Hospital	Canc Res	China Medical University Hospital	0	0		0	1
Significant Association of Methylenetetrahydrofolate Reductase Single Nucleotide Polymorphisms with Prostate Cancer Susceptibility in Taiwan	2010	WOS:000283009400049	Oncology	Anticancer Research	0250-7005	1.658	0	0	China Medical University Hospital	GU	China Med Univ Hosp	0	0		0	1																		1									1
Significant Association of Caveolin-1 (CAV1) Genotypes with Prostate Cancer Susceptibility in Taiwan	2011	WOS:000288684800052	Oncology	Anticancer Research	0250-7005	1.725	0	0	China Medical University Hospital	GU	China Med Univ Hosp	0	0		0	1																											1
Validation of the Chinese-Canadian study of health and aging clinical frailty scale (CSHA-CFS) telephone version	2010	WOS:000290714700016	Geriatrics & Gerontology	Archives of Gerontology and Geriatrics	0167-4943	1.438	0	1	National Taiwan University & Hospital	Dept Geriatr & Gerontol	Natl Taiwan Univ Hosp	0	0		1	1			1		1
Vitamin D insufficiency and frailty syndrome in older adults living in a Northern Taiwan community	2010	WOS:000274865000005	Geriatrics & Gerontology	Archives of Gerontology and Geriatrics	0167-4943	1.438	0	1	National Taiwan University & Hospital	Dept Geriatr & Gerontol	Natl Taiwan Univ Hosp	0	0		1	1			1		1
Outcomes of hospitalized elderly patients with geriatric syndrome: report of a community hospital reform plan in Taiwan	2010	WOS:000274865000008	Geriatrics & Gerontology	Archives of Gerontology and Geriatrics	0167-4943	1.438	1	1	National Taiwan University & Hospital	FM	Natl Taiwan Univ	0	0		0	0
Who determines the rehabilitation needs of care home residents? An observational survey	2011	WOS:000286980900009	Geriatrics & Gerontology	Archives of Gerontology and Geriatrics	0167-4943	1.452	0	1	Taipei Veterans General Hospital	Geriatrics	Taipei Vet Gen Hosp	0	0		1	1					1
A quick dementia screening tool for primary care physicians	2011	WOS:000291476100036	Geriatrics & Gerontology	Archives of Gerontology and Geriatrics	0167-4943	1.452	1	1	National Taiwan University & Hospital	FM	Natl Taiwan Univ Hosp	0	0		1	1					1
The prevalence of subjective frailty and factors associated with frailty in Taiwan	2010	WOS:000274865000011	Geriatrics & Gerontology	Archives of Gerontology and Geriatrics	0167-4943	1.438	1	1	National Taiwan University & Hospital	FM	Natl Taiwan Univ Hosp	0	0		1	1
Evaluating probability of cancer among older people with unexplained, unintentional weight loss	2010	WOS:000274865000007	Geriatrics & Gerontology	Archives of Gerontology and Geriatrics	0167-4943	1.438	1	1	Taipei Veterans General Hospital	FM	Taipei Vet Gen Hosp	0	0		0	1					1
Predictors of functional recovery (FR) for elderly hospitalized patients in a geriatric evaluation and management unit (GEMU) in Taiwan	2010	WOS:000274865000002	Geriatrics & Gerontology	Archives of Gerontology and Geriatrics	0167-4943	1.438	0	0	Taichung Veterans General Hospital	AIR	Taichung Vet Gen Hosp	0	0		1	1					1					1			1
Relationship between age and serum thyrotropin among asymptomatic older people in Taiwan	2010	WOS:000280580200002	Geriatrics & Gerontology	Archives of Gerontology and Geriatrics	0167-4943	1.438	0	1	Taipei Veterans General Hospital	Meta	Taipei Vet Gen Hosp	0	0		0	1					1												1
Metabolic characteristics of breakfast-vegetarian (BV) elderly people in rural Taiwan	2010	WOS:000273918600005	Geriatrics & Gerontology	Archives of Gerontology and Geriatrics	0167-4943	1.438	1	1	Taipei Veterans General Hospital	FM	Taipei Vet Gen Hosp	0	0		0	1	1				1
Rehabilitation outcome in home-based versus supervised exercise programs for chronically dizzy patients	2010	WOS:000282597400029	Geriatrics & Gerontology	Archives of Gerontology and Geriatrics	0167-4943	1.438	0	0	Taipei Veterans General Hospital	Rehab	Taipei Vet Gen Hosp	0	0		0	1					1
Inability of waist-to-height ratio to predict new onset diabetes mellitus among older adults in Taiwan: A five-year observational cohort study	2011	WOS:000291476100001	Geriatrics & Gerontology	Archives of Gerontology and Geriatrics	0167-4943	1.452	0	0	Natl Taiwan Univ Sci & Technol	Dept Ind Management	Natl Taiwan Univ Sci & Technol	0	0		1	1
Dementia care costs and the patient's quality of life (QoL) in Taiwan: Home versus institutional care services	2010	WOS:000280580200010	Geriatrics & Gerontology	Archives of Gerontology and Geriatrics	0167-4943	1.438	0	0	Taipei Veterans General Hospital	Hlth Policy	Natl Taiwan Univ	1	USA	North America	1	1					1
Assessment of behavioral and psychological symptoms of dementia by family caregivers	2011	WOS:000284827100024	Geriatrics & Gerontology	Archives of Gerontology and Geriatrics	0167-4943	1.452	0	1	National Taiwan University & Hospital	Neuro	Natl Taiwan Univ Hosp	0	0		1	1											1
The effectiveness of a comprehensive geriatric assessment intervention program for frailty in community-dwelling older people: a randomized, controlled trial	2010	WOS:000274865000010	Geriatrics & Gerontology	Archives of Gerontology and Geriatrics	0167-4943	1.438	1	1	National Taiwan University & Hospital	FM	Natl Taiwan Univ Hosp	0	0		1	1
Screening cognitive impairment among institutionalized older Chinese men in Taiwan: A new minimum data set-based dementia screening tool is needed	2011	WOS:000291476100006	Geriatrics & Gerontology	Archives of Gerontology and Geriatrics	0167-4943	1.452	1	1	Taichung Veterans General Hospital	FM	Taichung Vet Gen Hosp	0	0		0	1					1
A hospital-based multidisciplinary approach improves nutritional status of the elderly living in long-term care facilities in middle Taiwan	2010	WOS:000274865000006	Geriatrics & Gerontology	Archives of Gerontology and Geriatrics	0167-4943	1.438	1	1	National Taiwan University & Hospital	FM	Natl Taiwan Univ Hosp	0	0		1	1				1
Risk factors of potentially inappropriate medications among older patients visiting the community health center in rural Taiwan	2011	WOS:000292547000054	Geriatrics & Gerontology	Archives of Gerontology and Geriatrics	0167-4943	1.452	1	1	Taipei Veterans General Hospital	FM	Taipei Vet Gen Hosp	0	0		0	1					1
Health, financial stresses, and life satisfaction affecting late-life depression among older adults: a nationwide, longitudinal survey in Taiwan	2010	WOS:000274865000009	Geriatrics & Gerontology	Archives of Gerontology and Geriatrics	0167-4943	1.438	1	0	National Taiwan University & Hospital	FM	Natl Taiwan Univ Hosp	0	0		1	1
Association between serum copper, zinc and hospital admissions among care home residents	2010	WOS:000278134400028	Geriatrics & Gerontology	Archives of Gerontology and Geriatrics	0167-4943	1.438	1	1	Taipei Veterans General Hospital	FM	Taipei Vet Gen Hosp	0	0		0	1					1
Impact of nutritional status on long-term functional outcomes of post-acute stroke patients in Taiwan	2011	WOS:000292547000014	Geriatrics & Gerontology	Archives of Gerontology and Geriatrics	0167-4943	1.452	0	1	Taipei Veterans General Hospital	Neuro	Taipei Vet Gen Hosp	0	0		1	1	1				1						1
Diabetes mellitus and functional impairment in Taiwanese older men and women	2010	WOS:000274865000003	Geriatrics & Gerontology	Archives of Gerontology and Geriatrics	0167-4943	1.438	0	1	National Taiwan University & Hospital	Pshychol	Natl Taiwan Univ	0	0		1	1					1
Evaluating diagnostic strategy of older patients with unexplained unintentional body weight loss: A hospital-based study	2011	WOS:000291476100012	Geriatrics & Gerontology	Archives of Gerontology and Geriatrics	0167-4943	1.452	0	1	Taipei Veterans General Hospital	GI	Taipei Vet Gen Hosp	0	0		0	1					1										1
Integrated care for severely disabled long-term care facility residents: Is it better?	2010	WOS:000276454900014	Geriatrics & Gerontology	Archives of Gerontology and Geriatrics	0167-4943	1.438	0	1	Taipei Veterans General Hospital	Nursing	Taipei Vet Gen Hosp	0	0		1	1
Hepatic steatosis: An experimental model for quantification	2011	WOS:000286980900014	Geriatrics & Gerontology	Archives of Gerontology and Geriatrics	0167-4943	1.452	0	1	Taipei Veterans General Hospital	GI	Taipei Vet Gen Hosp	0	0		0	1					1										1
How family support affects physical activity (PA) among middle-aged and elderly people before and after they suffer from chronic diseases	2011	WOS:000293881100009	Geriatrics & Gerontology	Archives of Gerontology and Geriatrics	0167-4943	1.452	0	0	Taichung Veterans General Hospital	Nursing	Chung Shan Med Univ	0	0		1	1					1					1			1
Patient Satisfaction Survey of a Self-Paid Physical Checkup Program for Cancer Screening	2011	WOS:000302013900020	Oncology	Asian Pacific Journal of Cancer Prevention	1513-7368	0.659	1	0	Taichung Veterans General Hospital	FM	Taichung Veterans General Hospital	0	0		0	1
Albuminuria is strongly associated with arterial stiffness, especially in diabetic or hypertensive subjects-A population-based study (Taichung Community Health Study, TCHS)	2010	WOS:000279530000057	Peripheral Vascular Disease	Atherosclerosis	0021-9150	4.086	1	1	China Medical University Hospital	FM	China Med Univ Hosp	1	USA	North America	1	1			1	1
Smokers show reduced circulating adiponectin levels and adiponectin mRNA expression in peripheral blood mononuclear cells	2011	WOS:000294475600029	Peripheral Vascular Disease	Atherosclerosis	0021-9150	3.794	1	0	National Taiwan University & Hospital	FM	Natl Taiwan Univ Hosp	0	0		1	1	1				1															1
Association of low glomerular filtration rate and albuminuria with peripheral arterial disease: The National Health and Nutrition Examination Survey, 1999-2004	2010	WOS:000275101500040	Peripheral Vascular Disease	Atherosclerosis	0021-9150	4.086	0	0	Mackay Memoral Hospital	CV	Natl Taiwan Univ Hosp	0	0		1	1																		1		1
Glucokinase inhibitor glucosamine stimulates feeding and activates hypothalamic neuropeptide Y and orexin neurons	2011	WOS:000291418400034	Behavioral Sciences	Behavioural Brain Research	0166-4328	3.417	0	0	Chang Gung Memorial Hospital	Pharm	Univ Cambridge	1	England	Europe	1	1																	1
			Neurosciences										Peoples R China	Asia
A New Microsphere-Based Immunoassay for Measuring the Activity of Transcription Factors	2010	WOS:000284155300002	Biochemical Research Methods	Biological Procedures Online	1480-9222	0.742	0	0	Hualien Hosp	Mol Med	Natl Chiao Tung Univ	0	0		1	1
Regenerative potentials of platelet-rich plasma enhanced by collagen in retrieving pro-inflammatory cytokine-inhibited chondrogenesis	2011	WOS:000292714700012	Engineering, Biomedical	Biomaterials	0142-9612	7.404	0	0	Taipei Medical University & Hospital	ENT	Wan Fang Hosp	1	Peoples R China	Asia	1	1											1
			Materials Science, Biomaterials
Iron overload is associated with low anti-mullerian hormone in women with transfusion-dependent beta-thalassaemia	2011	WOS:000290541600008	Obstetrics & Gynecology	Bjog-an International Journal of Obstetrics and Gynaecology	1470-0328	3.407	0	0	Taoyuan General Hospital	GYN	Natl Taiwan Univ Hosp	0	0		1	1																														1
Association between chronic viral hepatitis infection and breast cancer risk: a nationwide population-based case-control study	2011	WOS:000299330900001	Oncology	Bmc Cancer	1471-2407	3.011	0	1	PoJen General Hospital	FM	Pojen Gen Hosp	0	0		1	1	1
									Taipei Medical University & Hospital
Magnetic resonance imaging for lung cancer detection: Experience in a population of more than 10,000 healthy individuals	2011	WOS:000292732900001	Oncology	Bmc Cancer	1471-2407	3.011	1	0	Taipei Veterans General Hospital	FM	Taipei Vet Gen Hosp	0	0		0	1																		1
An examination of cancer-related fatigue through proposed diagnostic criteria in a sample of cancer patients in Taiwan	2011	WOS:000295233700001	Oncology	Bmc Cancer	1471-2407	3.011	0	1	Cardinal Tien Hospital	FM	Cardinal Tien Hosp	0	0		1	1						1												1
									Taipei Medical University & Hospital
Risk factors associated with symptomatic cholelithiasis in Taiwan: a population-based study	2011	WOS:000296964100001	Gastroenterology & Hepatology	Bmc Gastroenterology	1471-230X	2.422	0	0	China Medical University Hospital	Emergency	Nantou Hosp	0	0		1	1	1																			1	1						1
Central obesity and atherogenic dyslipidemia in metabolic syndrome are associated with increased risk for colorectal adenoma in a Chinese population	2010	WOS:000279854300001	Gastroenterology & Hepatology	Bmc Gastroenterology	1471-230X	2.468	1	1	China Medical University Hospital	FM	China Med Univ Hosp	0	0		1	1	1			1							1
The association of serum lipids with the histological pattern of rectosigmoid adenoma in Taiwanese adults	2011	WOS:000291481500001	Gastroenterology & Hepatology	Bmc Gastroenterology	1471-230X	2.422	1	1	National Cheng Kung University & Hospital	FM	Natl Cheng Kung Univ Hosp	0	0		0	0
Clinical characteristics and prognosis of acute bacterial meningitis in elderly patients over 65: a hospital-based study	2011	WOS:000208731700091	Geriatrics & Gerontology	Bmc Geriatrics	1471-2318	0	1	0	Chang Gung Memorial Hospital	FM	Kaohsiung Chang Gung Mem Hosp	0	0		1	1											1
Home healthcare services in Taiwan: a nationwide study among the older population	2010	WOS:000283124400001	Health Care Sciences & Services	Bmc Health Services Research	1472-6963	1.721	1	1	Taipei Veterans General Hospital	FM	Taipei Vet Gen Hosp	0	0		1	1					1
Partnership disengagement from primary community care networks (PCCNs): A qualitative study for a national demonstration project	2010	WOS:000277995300001	Health Care Sciences & Services	Bmc Health Services Research	1472-6963	1.721	0	0	China Medical University Hospital	NA	Taichung Hosp	0	0		1	1	1			1				1
Factor analysis of the clustering of common somatic symptoms: a preliminary study	2010	WOS:000279883200001	Health Care Sciences & Services	Bmc Health Services Research	1472-6963	1.721	1	1	Cheng Ching Hosp	FM	Cheng Ching Hosp	0	0		1	1				1
Web-based computer adaptive assessment of individual perceptions of job satisfaction for hospital workplace employees	2011	WOS:000290907600001	Health Care Sciences & Services	Bmc Medical Research Methodology	1471-2288	2.66	0	1	Chi Mei Medical Center	NA	Chi Mei Med Ctr	1	Hong Kong	Asia	1	1													1								1
The Correlates of Leisure Time Physical Activity among an Adults Population from Southern Taiwan	2011	WOS:000293023000001	Public, Environmental & Occupational Health	Bmc Public Health	1471-2458	1.997	1	1	National Cheng Kung University & Hospital	FM	Natl Cheng Kung Univ Hosp	0	0		0	1
Association between Frequency Domain Heart Rate Variability and Unplanned Readmission to Hospital in Geriatric Patients	2011	WOS:000288222500001	Public, Environmental & Occupational Health	Bmc Public Health	1471-2458	1.997	1	0	Buddhist Tzu Chi General Hospital	FM	Buddhist Dalin Tzu Chi Gen Hosp	1	Canada	North America	1	1	1										1
Applying the revised Chinese Job Content Questionnaire to assess psychosocial work conditions among Taiwan's hospital workers	2011	WOS:000293326600001	Public, Environmental & Occupational Health	Bmc Public Health	1471-2458	1.997	0	1	Chi Mei Medical Center	NA	Chi Mei Med Ctr	1	Nicaragua	Central America	1	1		1		1			1						1
The evaluation of a Taiwanese training program in smoking cessation and the trainees' adherence to a practice guideline	2010	WOS:000275408800003	Public, Environmental & Occupational Health	Bmc Public Health	1471-2458	2.364	0	1	National Taiwan University & Hospital	NA	Natl Taiwan Univ Hosp	0	0		1	0
									Cardinal Tien Hospital
									National Cheng Kung University & Hospital
Sex difference in the association of metabolic syndrome with high sensitivity C-reactive protein in a Taiwanese population	2010	WOS:000281863100002	Public, Environmental & Occupational Health	Bmc Public Health	1471-2458	2.364	1	1	China Medical University Hospital	FM	China Med Univ Hosp	0	0		1	1	1		1	1			1
Metabolic syndrome is associated with change in subclinical arterial stiffness - A community-based Taichung Community Health Study	2011	WOS:000296885500001	Public, Environmental & Occupational Health	Bmc Public Health	1471-2458	1.997	0	0	China Medical University Hospital	Publ Hlth	China Med Univ Hosp	0	0		1	1	1			1			1
The relationship of high sensitivity C-reactive protein to percent body fat mass, body mass index, waist-to-hip ratio, and waist circumference in a Taiwanese population	2010	WOS:000283313700001	Public, Environmental & Occupational Health	Bmc Public Health	1471-2458	2.364	1	0	China Medical University Hospital	FM	China Med Univ Hosp	1	USA	North America	1	1	1		1	1			1										1
Worksite health screening programs for predicting the development of Metabolic Syndrome in middle-aged employees: a five-year follow-up study	2010	WOS:000285480900001	Public, Environmental & Occupational Health	Bmc Public Health	1471-2458	2.364	0	0	Shin Kong Wu Ho Su Mem Hosp	Publ Hlth	Tao Yuan Gen Hosp	0	0		1	1	1																			1
Non-leisure time physical activity is an independent predictor of longevity for a Taiwanese elderly population: an eight-year follow-up study	2011	WOS:000292559900001	Public, Environmental & Occupational Health	Bmc Public Health	1471-2458	1.997	1	1	Kaohsiung Municipal Min Shen Hosp	FM	Kaohsiung Municipal Min Shen Hosp	0	0		1	0
									National Cheng Kung University & Hospital
Decrease in seroprevalence of Hepatitis A after the implementation of nationwide disposable tableware use in Taiwan	2010	WOS:000285308700001	Public, Environmental & Occupational Health	Bmc Public Health	1471-2458	2.364	1	0	Chi Mei Medical Center	FM	Chi Mei Med Ctr	0	0		1	1		1											1		1
Second-hand smoke and chronic bronchitis in Taiwanese women: a health-care based study	2010	WOS:000275887300001	Public, Environmental & Occupational Health	Bmc Public Health	1471-2458	2.364	0	1	Kaohsiung Medical University & Hospital	Occupat Safety	Kaohsiung Med Univ	0	0		1	1	1	1										1
Comorbidity profiles among patients with bullous pemphigoid: a nationwide population-based study	2011	WOS:000294362100025	Dermatology	British Journal of Dermatology	0007-0963	3.666	0	0	Taipei Veterans General Hospital	FM	Taichung Vet Gen Hosp	1	Germany	Europe	1	1	1		1								1
Body mass index and all-cause mortality in a large Chinese cohort	2011	WOS:000288872600013	Medicine, General & Internal	Canadian Medical Association Journal	0820-3946	8.217	1	1	China Medical University Hospital	FM	China Med Univ Hosp	1	USA	North America	1	1			1	1
									National Taiwan University & Hospital
Risk of cancer among patients with herpes zoster infection: a population-based study	2012	WOS:000311579400011	Medicine, General & Internal	Canadian Medical Association Journal	0820-3946	6.465	0	0	Taipei Veterans General Hospital	Med Res & Educ	Taipei Vet Gen Hosp	0	0		0	1	1													1		1				1	1
Polymorphisms in one-carbon metabolism pathway genes, urinary arsenic profile, and urothelial carcinoma	2010	WOS:000281934800008	Oncology	Cancer Causes & Control	0957-5243	2.789	0	0	Taipei Medical University & Hospital	Publ Hlth	Taipei Med Univ	0	0		1	1	1																										1
			Public, Environmental & Occupational Health
Synergistic anticancer activity of triptolide combined with cisplatin enhances apoptosis in gastric cancer in vitro and in vivo	2012	WOS:000303487500011	Oncology	Cancer Letters	0304-3835	4.258	0	1	Buddhist Tzu Chi General Hospital	NA	Buddhist Tzu Chi Gen Hosp	0	0		1	1
Differences Between Inpatient Hospice Care and In-hospital Nonhospice Care for Cancer Patients	2011	WOS:000289772200003	Oncology	Cancer Nursing	0162-220X	1.792	1	1	Chang Gung Memorial Hospital	FM	Chang Gung Univ	0	0		0	1																				1
			Nursing
Which Factors Have the Greatest Influence on Bereaved Families' Willingness to Execute Advance Directives in Taiwan?	2011	WOS:000288315400006	Oncology	Cancer Nursing	0162-220X	1.792	0	0	National Taiwan University & Hospital	Nursing	Natl Taiwan Univ	1	USA	North America	1	1
			Nursing
Predicting insulin resistance using the triglyceride-to-high-density lipoprotein cholesterol ratio in Taiwanese adults	2011	WOS:000296833400001	Cardiac & Cardiovascular Systems	Cardiovascular Diabetology	1475-2840	3.346	1	0	Buddhist Tzu Chi General Hospital	FM	Buddhist Dalin Tzu Chi Gen Hosp	1	Canada	North America	1	1	1									1
			Endocrinology & Metabolism
Joint relationship between renal function and proteinuria on mortality of patients with type 2 diabetes: The Taichung Diabetes Study	2012	WOS:000312009400001	Cardiac & Cardiovascular Systems	Cardiovascular Diabetology	1475-2840	4.209	1	0	China Medical University Hospital	FM	China Med Univ Hosp	1	USA	North America	1	1	1			1							1						1
			Endocrinology & Metabolism
Betel nut extract and arecoline block insulin signaling and lipid storage in 3T3-L1 adipocytes	2011	WOS:000300087700002	Cell Biology	Cell Biology and Toxicology	0742-2091	2.511	0	0	Kaohsiung Medical University & Hospital	Gene	Kaohsiung Med Univ	1	Japan	Asia	1	1		1															1
			Toxicology
Whole Genome Expression in Peripheral-Blood Samples of Workers Professionally Exposed to Polycyclic Aromatic Hydrocarbons	2011	WOS:000295817800006	Chemistry, Medicinal	Chemical Research in Toxicology	0893-228X	3.779	1	1	Kaohsiung Medical University & Hospital	FM	Kaohsiung Med Univ Hosp	0	0		1	1	1	1													1
			Chemistry, Multidisciplinary
			Toxicology
Role of ERK Signaling in the Neuroprotective Efficacy of Magnesium Sulfate Treatment During Focal Cerebral Ischemia in the Gerbil Cortex	2010	WOS:000283700400004	Physiology	Chinese Journal of Physiology	0304-4920	0.683	0	0	China Medical University Hospital	NA	China Med Univ	0	0		1	1								1										1
Influence of Adiponectin Gene Polymorphisms on Adiponectin Serum Level and Insulin Resistance Index in Taiwanese Metabolic Syndrome Patients	2012	WOS:000313379000005	Physiology	Chinese Journal of Physiology	0304-4920	0.748	1	1	China Medical University Hospital	FM	China Med Univ Hosp	0	0		1	1	1			1
Endometriosis coexisting with dermoid cyst in a single ovary: a case report	2011	WOS:000287992500027	Medicine, General & Internal	Chinese Medical Journal	0366-6999	0.064	0	1	Natl Chung Hsing Univ	GYN	Natl Chung Hsing Univ	0	0		1	1																														1
Overt hypothyroidism with rhabdomyolysis and myopathy: a case report	2010	WOS:000275740200024	Medicine, General & Internal	Chinese Medical Journal	0366-6999	0.983	1	0	Lin Shin Hospital	FM	Lin Shin Med Corp Lin Shin Hosp	0	0		0	1																	1
OBESITY AND HIGH BLOOD PRESSURE OF 12-HOUR NIGHT SHIFT FEMALE CLEAN-ROOM WORKERS	2010	WOS:000276363200008	Biology	Chronobiology International	0742-0528	5.576	1	1	Shin Kong Wu Ho Su Mem Hosp	FM	Shin Kong Wu Ho Su Mem Hosp	0	0		1	0
			Physiology
Plasma leptin levels and digital pulse volume in obese patients without metabolic syndrome - A pilot study	2011	WOS:000288634500009	Medical Laboratory Technology	Clinica Chimica Acta	0009-8981	2.535	0	0	National Taiwan University & Hospital	CV	Natl Taiwan Univ Hosp	0	0		0	1								1
Serological surveillance and IL-10 genetic variants on anti-HBs titers: Hepatitis B vaccination 20 years after neonatal immunization in Taiwan	2011	WOS:000288634500015	Medical Laboratory Technology	Clinica Chimica Acta	0009-8981	2.535	0	0	China Medical University Hospital	Med Res	China Med Univ Hosp	0	0		1	1			1
The impact of osteopontin promoter polymorphisms on the risk of calcium urolithiasis	2010	WOS:000277224200023	Medical Laboratory Technology	Clinica Chimica Acta	0009-8981	2.389	0	1	Kaohsiung Medical University & Hospital	GU	Kaohsiung Med Univ Hosp	0	0		1	1		1																									1
Urinary melamine and adult urolithiasis in Taiwan	2010	WOS:000274102700011	Medical Laboratory Technology	Clinica Chimica Acta	0009-8981	2.389	0	1	Kaohsiung Medical University & Hospital	Occupat Safety	Kaohsiung Med Univ Hosp	0	0		0	1		1																									1
Effects of cytokine and cytokine receptor gene variation on high anti-HB titers: Following up on Taiwan's neonatal hepatitis B immunization program	2012	WOS:000305370300006	Medical Laboratory Technology	Clinica Chimica Acta	0009-8981	2.85	0	0	China Medical University Hospital	Med Res	China Med Univ Hosp	0	0		1	1
Detection of melamine in a human renal uric acid stone by matrix-assisted laser desorption/ionization time-of-flight mass spectrometry (MALDI-TOF MS)	2012	WOS:000307924000048	Medical Laboratory Technology	Clinica Chimica Acta	0009-8981	2.85	0	1	Kaohsiung Medical University & Hospital	GU	Kaohsiung Med Univ Hosp	0	0		1	1	1	1																									1
Persistence of Immunogenicity of a Monovalent Influenza Virus A/H1N1 2009 Vaccine in Healthy Volunteers	2012	WOS:000300841200021	Immunology	Clinical and Vaccine Immunology	1556-6811	2.598	1	1	National Taiwan University & Hospital	FM	Natl Taiwan Univ Hosp	0	0		0	1																				1
			Infectious Diseases
			Microbiology
Changes of serum adiponectin and soluble intercellular adhesion molecule-1 concentrations after smoking cessation	2012	WOS:000305631600015	Medical Laboratory Technology	Clinical Chemistry and Laboratory Medicine	1434-6621	3.009	1	0	National Taiwan University & Hospital	FM	Natl Taiwan Univ Hosp	0	0		1	1	1				1															1
Serum myostatin levels and grip strength in normal subjects and patients on maintenance haemodialysis	2011	WOS:000296912900023	Endocrinology & Metabolism	Clinical Endocrinology	0300-0664	3.16	0	0	National Taiwan University & Hospital	Rehabilitation	Natl Taiwan Univ Hosp	0	0		0	1																				1
Serum fetuin-A concentrations are elevated in subjects with impaired glucose tolerance and newly diagnosed type 2 diabetes	2011	WOS:000295048600007	Endocrinology & Metabolism	Clinical Endocrinology	0300-0664	3.16	0	1	National Cheng Kung University & Hospital	Internal Med	Natl Cheng Kung Univ Hosp	0	0		0	1																				1
Low Seroprotection against Preseasonal Influenza Local Strains in Children Might Predict the Upcoming Epidemic Influenza Strains	2010	WOS:000278929900008	Immunology	Clinical Infectious Diseases	1058-4838	8.186	0	0	National Taiwan University & Hospital	Infection	Natl Taiwan Univ Hosp	0	0		1	1														1
			Infectious Diseases
			Microbiology
Cancer-Specific Mortality in Chronic Kidney Disease: Longitudinal Follow-Up of a Large Cohort	2011	WOS:000290372600024	Urology & Nephrology	Clinical Journal of the American Society of Nephrology	1555-9041	5.227	1	1	Taiwan Adventist Hosp	FM	Taiwan Adventist Hosp	0	0		1	1					1															1
									National Taiwan University & Hospital
									N Coast Jin Shan Hosp
Antidiabetes Drugs Correlate With Decreased Risk of Lung Cancer: A Population-Based Observation in Taiwan	2012	WOS:000301314700009	Oncology	Clinical Lung Cancer	1525-7304	2.038	1	0	China Medical University Hospital	FM	China Med Univ Hosp	0	0		1	1	1																			1
The experiences of non-operative treatment in patients with bacterial brain abscess	2011	WOS:000288501700025	Infectious Diseases	Clinical Microbiology and Infection	1198-743X	4.54	1	0	Chang Gung Memorial Hospital	FM	Chang Gung Univ	0	0		0	1											1							1			1							1
			Microbiology
Mycobacterium tuberculosis infection of end-stage renal disease patients in Taiwan: a nationwide longitudinal study	2011	WOS:000296916300015	Infectious Diseases	Clinical Microbiology and Infection	1198-743X	4.54	0	0	Taipei Veterans General Hospital	Nephro	Taipei Vet Gen Hosp	0	0		1	1											1		1
			Microbiology
Cost-effectiveness of influenza immunization in adult cancer patients in Taiwan	2010	WOS:000277523700024	Infectious Diseases	Clinical Microbiology and Infection	1198-743X	4.784	0	0	National Cheng Kung University & Hospital	Publ Hlth	Natl Cheng Kung Univ Hosp	0	0		1	1	1													1
			Microbiology
Statin Use and Hospitalization in Patients with Chronic Obstructive Pulmonary Disease: A Nationwide Population-Based Cohort Study in Taiwan	2011	WOS:000297037800003	Pharmacology & Pharmacy	Clinical Therapeutics	0149-2918	2.321	0	0	Taipei Veterans General Hospital	CV	Taipei Vet Gen Hosp	0	0		0	1				1				1
Risk of herpes zoster in patients with systemic lupus erythematosus: a three-year follow-up study using a nationwide population-based cohort	2011	WOS:000294436800009	Medicine, General & Internal	Clinics	1807-5932	2.058	0	0	Taipei Veterans General Hospital	AIR	Taichung Vet Gen Hosp	0	0		1	1										1
Prevalence of metabolic syndrome and related factors in Taiwanese high-tech industry workers	2011	WOS:000297498400004	Medicine, General & Internal	Clinics	1807-5932	2.058	0	0	Buddhist Tzu Chi General Hospital	NA	Buddhist Dalin Tzu Chi Gen Hosp	0	0		0	1
Subjective quality of life in patients with chronic schizophrenia: relationships between psychosocial and clinical characteristics	2011	WOS:000287647700009	Psychiatry	Comprehensive Psychiatry	0010-440X	2.257	0	0	Armed Forces General Hospital	Psychi	SongShan Armed Forces Gen Hosp	0	0		1	1							1
Validation of Patient Health Questionnaire for depression screening among primary care patients in Taiwan	2011	WOS:000286410100013	Psychiatry	Comprehensive Psychiatry	0010-440X	2.257	0	0	Mackay Memoral Hospital	Psychi	Mackay Mem Hosp	0	0		1	1							1
Brain Glucose Sensors Play a Significant Role in the Regulation of Pancreatic Glucose-Stimulated Insulin Secretion	2012	WOS:000299798100009	Endocrinology & Metabolism	Diabetes	0012-1797	7.895	0	0	Chang Gung Memorial Hospital	NA	Univ Cambridge	1	England	Europe	1	1
													Italy	Europe
Association Between Insulin Resistance and Development of Microalbuminuria in Type 2 Diabetes A prospective cohort study	2011	WOS:000289221800033	Endocrinology & Metabolism	Diabetes Care	0149-5992	8.087	0	0	National Cheng Kung University & Hospital	NA	China Med Univ Hosp	0	0		1	1	1												1				1			1
Impact of Lifestyle-Related Factors on All-Cause and Cause-Specific Mortality in Patients With Type 2 Diabetes The Taichung Diabetes Study	2012	WOS:000298771900018	Endocrinology & Metabolism	Diabetes Care	0149-5992	7.735	1	0	China Medical University Hospital	FM	China Med Univ Hosp	0	0		1	1	1			1							1						1
Elevated alanine aminotransferase is associated with metabolic syndrome but not consistently associated with impaired fasting glucose or type 2 diabetes mellitus	2011	WOS:000296529100017	Endocrinology & Metabolism	Diabetes Research and Clinical Practice	0168-8227	2.754	1	0	Chang Gung Memorial Hospital	FM	Chang Gung Mem Hosp	1	England	Europe	1	1							1											1
Advanced glycation end products-induced apoptosis attenuated by PPAR delta activation and epigallocatechin gallate through NF-kappa B pathway in human embryonic kidney cells and human mesangial cells	2010	WOS:000280033900011	Endocrinology & Metabolism	Diabetes-Metabolism Research and Reviews	1520-7552	3.094	0	0	Taipei Veterans General Hospital	NA	Fu Jen Cathol Univ	1	USA	North America	1	1		1											1				1
Cigarette smoking and proteinuria in Taiwanese men with Type 2 diabetes mellitus	2010	WOS:000275095600007	Endocrinology & Metabolism	Diabetic Medicine	0742-3071	3.036	0	0	Tri-Service General Hospital	Hlth Policy	Natl Hlth Res Inst	1	USA	North America	1	1	1												1				1			1
									National Cheng Kung University & Hospital
Fatal case of community-acquired empyema thoracis and candidemia caused by Candida albicans	2011	WOS:000295425700010	Infectious Diseases	Diagnostic Microbiology and Infectious Disease	0732-8893	2.528	0	0	Losheng Sanat	Internal Med	Taoyaun Gen Hosp	0	0		1	1																				1
			microbiology
Erosive Esophagitis in Asymptomatic Subjects: Risk Factors	2010	WOS:000277283500018	Gastroenterology & Hepatology	Digestive Diseases and Sciences	0163-2116	2.06	1	0	Kaohsiung Veterans General Hospital	FM	Kaohsiung Vet Gen Hosp	0	0		1	1	1														1
The Long-Term Effect of Statins on the Risk of New-Onset Diabetes Mellitus in Elderly Taiwanese Patients with Hypertension and Dyslipidaemia A Retrospective Longitudinal Cohort Study	2012	WOS:000300385800005	Geriatrics & Gerontology	Drugs & Aging	1170-229X	2.646	0	0	Puli Vet Hosp	Dept Hlth Serv Management	China Med Univ	0	0		1	1	1							1
			Pharmacology & Pharmacy
Mean Hearing Thresholds Among School Children in Taiwan	2011	WOS:000287482200011	Audiology & Speech-Language Pathology	Ear and Hearing	0196-0202	2.578	0	0	Taipei City Hospital	ENT	Taipei City Hosp	0	0		1	1	1
			Otorhinolaryngology
Child developmental screening instrument from six to thirty-six months in Taiwan Birth Cohort Study	2010	WOS:000275597100004	Obstetrics & Gynecology	Early Human Development	0378-3782	1.587	0	0	Chung Shan Medical University & Hospital	Psychi	Natl Def Med Ctr	0	0		1	1				1			1
			Pediatrics
Simultaneous determination of aripiprazole and its active metabolite, dehydroaripiprazole, in plasma by capillary electrophoresis combining on-column field-amplified sample injection and application in schizophrenia	2010	WOS:000281732900011	Biochemical Research Methods	Electrophoresis	0173-0835	3.569	0	0	Kaohsiung Medical University & Hospital	Pharm	Kaohsiung Med Univ	0	0		1	1							1
			Chemistry
			Analytical
Traumatic abdominal wall hernia secondary to handlebar injury: a case report	2011	WOS:000295984200020	Emergency Medicine	Emergency Medicine Journal	1472-0205	1.439	1	0	Lin Shin Hospital	FM	Lin Shin Hosp	1	Peoples R China	Asia	1	1					1																1		1
Factor analysis of modifiable cardiovascular risk factors and prevalence of metabolic syndrome in adult Taiwanese	2011	WOS:000296787800015	Endocrinology & Metabolism	Endocrine	1355-008X	1.416	1	0	Cheng Ching Hosp	FM	Cheng Ching Hosp	0	0		1	1	1		1	1
Annual fasting plasma glucose variation increases risk of cancer incidence and mortality in patients with type 2 diabetes: the Taichung Diabetes Study	2012	WOS:000306504600007	Oncology	Endocrine-Related Cancer	1351-0088	5.261	1	0	China Medical University Hospital	FM	China Med Univ Hosp	0	0		1	1	1		1								1						1
			Endocrinology & Metabolism
Endoplasmic Reticulum Stress Induces the Expression of Fetuin-A to Develop Insulin Resistance	2012	WOS:000305781800007	Endocrinology & Metabolism	Endocrinology	0013-7227	4.717	0	1	National Cheng Kung University & Hospital	Internal Med	Natl Cheng Kung Univ	0	0		1	1																				1
The public health threat of phthalate-tainted foodstuffs in Taiwan: The policies the government implemented and the lessons we learned	2012	WOS:000304745900010	Environmental Sciences	Environment International	0160-4120	6.248	0	0	Kaohsiung Municipal Hsiaokang Hosp	Environm & Occupat Med	Kaohsiung Municipal Hsiaokang Hosp	0	0		1	1	1	1									1
High-frequency hearing loss, occupational noise exposure and hypertension: a cross-sectional study in male workers	2011	WOS:000290392600001	Environmental Sciences	Environmental Health	1476-069X	2.649	0	0	China Medical University Hospital	Publ Hlth	China Med Univ	0	0		1	1	1
			Public
			Environmental & Occupational Health
Outcomes of hospitalized patients with bacteraemic and non-bacteraemic community-acquired pneumonia caused by Streptococcus pneumoniae	2011	WOS:000294145300003	public	Epidemiology and Infection	0950-2688	2.843	0	0	Taipei City Hospital	Internal Med	Taipei Cty Hosp	0	0		1	1												1								1		1
			Environmental & Occupational Health
			Infectious Diseases
Positive attitudes and self-harming behavior of adolescents in a juvenile detention house in Taiwan	2011	WOS:000293022100005	psychology	European Child & Adolescent Psychiatry	1018-8827	2.821	1	0	Far Eastern Memoral Hospital	FM	Far Eastern Mem Hosp	0	0		1	1				1			1
			Developmental
			Pediatrics
			Psychiatry
Elevated serum dehydroepiandrosterone sulphate level correlates with increased risk for metabolic syndrome in the elderly men	2010	WOS:000274953000005	medicine	European Journal of Clinical Investigation	0014-2972	2.736	1	1	National Taiwan University & Hospital	FM	Natl Taiwan Univ Hosp	0	0		1	1	1				1
			General & Internal
			Research & Experimental
The associations of different measurements of obesity with cardiovascular risk factors in Chinese	2011	WOS:000288215100007	medicine	European Journal of Clinical Investigation	0014-2972	3.018	1	1	China Medical University Hospital	FM	China Med Univ	1	USA	North America	1	1			1	1
			General & Internal
			Research & Experimental
Statin use in patients with asthma - a nationwide population-based study	2011	WOS:000289253600006	medicine	European Journal of Clinical Investigation	0014-2972	3.018	0	0	Taipei Veterans General Hospital	CV	Taipei Vet Gen Hosp	0	0		1	1			1	1				1				1
			General & Internal
			Research & Experimental
Coffee consumption is inversely associated with type 2 diabetes in Chinese	2011	WOS:000290226400011	medicine	European Journal of Clinical Investigation	0014-2972	3.018	1	1	China Medical University Hospital	FM	China Med Univ Hosp	1	USA	North America	1	1	1		1	1																1
			General & Internal
			Research & Experimental
Impact of pneumococcal vaccines on invasive pneumococcal disease in Taiwan	2010	WOS:000275710600017	Infectious Diseases	European Journal of Clinical Microbiology & Infectious Diseases	0934-9723	2.631	1	0	Taipei City Hospital	FM	Taipei Cty Hosp	0	0		1	1																				1		1
			microbiology
Risk of extrathymic cancer in patients with myasthenia gravis in Taiwan: a nationwide population-based study	2012	WOS:000302908900017	Clinical Neurology	European Journal of Neurology	1351-5101	4.162	0	0	Taipei Veterans General Hospital	Hematol & Oncol	Taipei Vet Gen Hosp	0	0		1	1										1	1		1			1
			Neurosciences
Peroxisome proliferator-activated receptor delta agonists attenuated the C-reactive protein-induced pro-inflammation in cardiomyocytes and H9c2 cardiomyoblasts	2010	WOS:000280627700013	Pharmacology & Pharmacy	European Journal of Pharmacology	0014-2999	2.737	0	0	Taipei Veterans General Hospital	Life Science	Fu Jen Catholic Univ	0	0		1	1		1											1
Risk Factors of In-Hospital Mortality of Intracerebral Hemorrhage and Comparison of ICH Scores in a Taiwanese Population	2011	WOS:000292692600011	Clinical Neurology	European Neurology	0014-3022	1.811	0	0	Landseed Hosp	Infection	Landseed Hosp	0	0		1	1											1			1														1
			Neurosciences
Smoking Cessation Program in Outpatient Clinics of Family Medicine Department in Taiwan: A Longitudinal Evaluation	2010	WOS:000274556300003	Health Care Sciences & Services	Evaluation & the Health Professions	0163-2787	1.208	1	0	Kaohsiung Veterans General Hospital	FM	Kaohsiung Vet Gen Hosp	0	0		1	1			1
			Health Policy & Services
Garlic Oil Alleviates MAPKs- and IL-6-mediated Diabetes-related Cardiac Hypertrophy in STZ-induced DM Rats	2011	WOS:000293598600001	Integrative & Complementary Medicine	Evidence-Based Complementary and Alternative Medicine	1741-427X	4.774	0	0	China Medical University Hospital	Inst Biochem & Biotechnol	Chung Shan Med Univ	0	0		1	1		1		1											1
Prescriptions of Chinese Herbal Medicines for Insomnia in Taiwan during 2002	2011	WOS:000293348100001	Integrative & Complementary Medicine	Evidence-Based Complementary and Alternative Medicine	1741-427X	4.774	0	1	Taipei Veterans General Hospital	Chinese Medicine	Taipei Vet Gen Hosp	0	0		1	1
Impact of subjective sleep quality on glycemic control in type 2 diabetes mellitus	2012	WOS:000299416400006	Primary Health Care	Family Practice	0263-2136	1.828	1	1	Chang Gung Memorial Hospital	FM	Linkou Chang Gung Mem Hosp	0	0		1	1	1																1
			Medicine
			General & Internal
BCQ-: A Body Constitution Questionnaire to Assess Yin-Xu	2012	WOS:000321298400002	Integrative & Complementary Medicine	Forschende Komplementarmedizin	1021-7096	1.279	0	0	National Taiwan University & Hospital	Chinese Medicine	China Med Univ	1	USA	North America	1	1			1	1
Association between polypharmacy and dementia in older people: A population-based case-control study in Taiwan	2012	WOS:000305512700018	Geriatrics & Gerontology	Geriatrics & Gerontology International	1444-1586	2.167	1	0	China Medical University Hospital	FM	China Med Univ Hosp	0	0		1	1	1			1																1	1
The risk of Cellulitis in Cirrhotic Patients: A Nationwide Population-Based Study in Taiwan	2012	WOS:000310170600014	Gastroenterology & Hepatology	Gut and Liver	1976-2283	1.314	1	0	Buddhist Tzu Chi General Hospital	FM	Buddhist Dalin Tzu Chi Gen Hosp	0	0		1	1														1	1
Patient satisfaction evaluations in different clinic care models: Care stratification under a national demonstration project	2010	WOS:000272790200011	Public, Environmental & Occupational Health	Health & Place	1353-8292	2.694	0	0	China Medical University Hospital	Publ Hlth	China Med Univ Hosp	0	0		1	1	1			1				1
Correlates of institutionalized senior veterans' quality of life in Taiwan	2010	WOS:000282299000001	Health Care Sciences & Services	Health and Quality of Life Outcomes	1477-7525	1.86	1	0	Taipei Veterans General Hospital	FM	Taipei Vet Gen Hosp	0	0		1	1					1													1
			Health Policy & Services						National Cheng Kung University & Hospital
Partnership effectiveness in primary community care networks: A national empirical analysis of partners' coordination infrastructure designs	2010	WOS:000278823200004	Health Policy & Services	Health Care Management Review	0361-6274	1.721	0	0	China Medical University Hospital	FM	China Med Univ Hosp	0	0		1	1	1			1				1
The interaction between hepatitis B and C virus infections among intravenous and non-intravenous drug abusers in an area hyperendemic for hepatitis B	2010	WOS:000278271900017	Medicine, General & Internal	Healthmed	1840-2291	0.331	1	1	Kaohsiung Medical University & Hospital	FM	Kaohsiung Med Univ Hosp	0	0		0	1	1
Clinical prediction of pediatric dengue virus infection in Taiwan-a Rasch scaling approach	2011	WOS:000299863300019	Medicine, General & Internal	Healthmed	1840-2291	0.435	0	1	Chi Mei Medical Center	Emergency	Chi Mei Med Ctr	0	0		1	1				1									1								1
Aging modulates dispersion of ventricular repolarization in the very old of the geriatric population	2010	WOS:000285211600007	Cardiac & Cardiovascular Systems	Heart and Vessels	0910-8327	1.882	0	0	Taipei Medical University & Hospital	CV	Taipei Med Univ Hosp	0	0		0	1								1
			Peripheral Vascular Disease
Diverse cell morphology and intracellular calcium dynamics in pulmonary vein cardiomyocytes	2011	WOS:000286118100014	Cardiac & Cardiovascular Systems	Heart and Vessels	0910-8327	2.047	0	0	St Marys Hosp	NA	Taipei Med Univ Hosp	0	0		1	1								1
			Peripheral Vascular Disease
Determination of Immune Memory to Hepatitis B Vaccination Through Early Booster Response in College Students	2010	WOS:000277261400012	Gastroenterology & Hepatology	Hepatology	0270-9139	10.885	1	0	National Taiwan University & Hospital	FM	Natl Taiwan Univ Hosp	1	USA	North America	1	1	1																			1
Overexpression of aldo-keto reductase 1C2 is associated with disease progression in patients with prostatic cancer	2010	WOS:000281851100006	Cell Biology	Histopathology	0309-0167	3.569	1	0	Chung Shan Medical University & Hospital	FM	Chung Shan Med Univ	0	0		1	1	1																						1
			Pathology
Elevated Retinol Binding Protein 4 Contributes to Insulin Resistance in Spontaneously Hypertensive Rats	2011	WOS:000290205000004	Endocrinology & Metabolism	Hormone and Metabolic Research	0018-5043	2.188	0	1	National Cheng Kung University & Hospital	Internal Med	Natl Cheng Kung Univ	0	0		1	1																				1
Ostensibly ineffectual doses of cadmium and lipopolysaccharide causes liver damage in rats	2011	WOS:000291891200012	Toxicology	Human & Experimental Toxicology	0960-3271	1.772	0	0	Chi Mei Medical Center	Publ Hlth	Natl Cheng Kung Univ	0	0		1	1	1	1
Association of HLA-DRB1*0405 with resistance to multibacillary leprosy in Taiwanese	2010	WOS:000279493000011	Immunology	Human Immunology	0198-8859	2.872	1	0	Taoyuan General Hospital	FM	Tao Yuan Gen Hosp	0	0		1	1																							1
A Wearable Sensor Module With a Neural-Network-Based Activity Classification Algorithm for Daily Energy Expenditure Estimation	2012	WOS:000308992800022	Computer Science, Information Systems	Ieee Transactions on Information Technology in Biomedicine	1089-7771	1.978	0	0	National Cheng Kung University & Hospital	Elect Engn	Natl Cheng Kung Univ	0	0		0	1
			Computer Science, Interdisciplinary Applications
			Mathematical & Computational Biology
			Medical Informatics
Amentoflavone Induces Cell-cycle Arrest and Apoptosis in MCF-7 Human Breast Cancer Cells via Mitochondria-dependent Pathway	2012	WOS:000311770900013	medicine	In Vivo	0258-851X	1.219	0	0	Taoyuan General Hospital	pediatrics	TaoYuan Gen Hosp	0	0		1	1								1				1						1
			Research & Experimental
Improvement of abnormal liver enzymes after rosiglitazone treatment in Chinese type 2 diabetes	2012	WOS:000304603000017	Pharmacology & Pharmacy	Indian Journal of Pharmacology	0019-5472	0.583	0	0	Cardinal Tien Hospital	Internal Med	Cardinal Tien Hosp	0	0		1	1																	1			1
Dynamic Epidemic Model for Influenza with Clinical Complications	2011	WOS:000292652100007	public	Infection Control and Hospital Epidemiology	0899-823X	3.669	1	0	Taipei Medical University & Hospital	FM	Taipei Med Univ Hosp	0	0		1	1	1
			Environmental & Occupational Health
			Infectious Diseases
Suppressive Effect on MDC and IP-10 Expression in Monocytes by Endocrine Disruptor Chemicals	2010	WOS:000274110000002	Cell Biology	Inflammation	0360-3997	1.777	1	0	Armed Forces General Hospital	FM	Zuoying Armed Force Gen Hosp	0	0		1	1		1
			Immunology
Hematological abnormalities of acute exposure to hexachloroethane smoke inhalation	2010	WOS:000280535400006	Toxicology	Inhalation Toxicology	0895-8378	2.295	1	1	Tri-Service General Hospital	FM	Natl Def Med Ctr	0	0		1	1	1	1																					1
									Armed Forces General Hospital
Acute Myocardial Infarction Caused by Coronary Artery Dissection after a Blunt Chest Trauma	2011	WOS:000295038700016	Medicine, General & Internal	Internal Medicine	0918-2918	0.936	1	0	Changhua Christian Hospital	FM	Changhua Christian Hosp	0	0		0	1								1
Progression of Cognitive Dysfunction in Elderly Chronic Kidney Disease Patients in a Veteran's Institution in Central Taiwan: a 3-Year Longitudinal Study	2012	WOS:000299379900005	Medicine, General & Internal	Internal Medicine	0918-2918	0.973	0	0	Taichung Veterans General Hospital	Nephro	Taichung Vet Gen Hosp	0	0		1	1					1					1			1				1
Atypical work schedules are associated with poor sleep quality and mental health in Taiwan female nurses	2012	WOS:000310225100005	public	International Archives of Occupational and Environmental Health	0340-0131	2.097	0	0	Kaohsiung Medical University & Hospital	Occupat Safety	Kaohsiung Med Univ	0	0		1	1		1		1
			Environmental & Occupational Health
Comparison of clinical features, antimicrobial susceptibility, serotype distribution and outcomes of patients with hospital- and community-associated invasive pneumococcal disease	2010	WOS:000278870300005	Infectious Diseases	International Journal of Antimicrobial Agents	0924-8579	3.787	0	0	Taipei City Hospital	Internal Med	Taipei Cty Hosp,	0	0		1	1																				1		1
			microbiology
			Pharmacology & Pharmacy
Pigment epithelium-derived factor reduces the PDGF-induced migration and proliferation of human aortic smooth muscle cells through PPAR gamma activation	2012	WOS:000300069000005	Biochemistry & Molecular Biology	International Journal of Biochemistry & Cell Biology	1357-2725	4.152	0	0	National Taiwan University & Hospital	Cell biology	Natl Taiwan Univ	0	0		1	1																							1	1
			Cell Biology
The precancerous effect of emitted cooking oil fumes on precursor lesions of cervical cancer	2010	WOS:000279971500020	Oncology	International Journal of Cancer	0020-7136	4.926	0	1	Kaohsiung Medical University & Hospital	Publ Hlth	Kaohsiung Med Univ Hosp	0	0		1	1	1	1			1																									1
Plasma decorin predicts the presence of esophageal squamous cell carcinoma	2010	WOS:000282539600015	Oncology	International Journal of Cancer	0020-7136	4.926	0	1	Kaohsiung Medical University & Hospital	GI	Kaohsiung Med Univ Hosp	0	0		1	1		1													1	1										1
Comparison of PPAR delta and PPAR gamma in inhibiting the pro-inflammatory effects of C-reactive protein in endothelial cells	2010	WOS:000281874500024	Cardiac & Cardiovascular Systems	International Journal of Cardiology	0167-5273	6.802	0	0	Taipei Veterans General Hospital	Life Science	Fu Jen Catholic Univ	0	0		1	1		1											1
Arthroscopic shaver with refinement for axillary osmidrosis	2010	WOS:000279022400016	Dermatology	International Journal of Dermatology	0011-9059	1.265	0	0	E Da Hospital	Derma	Chang Gung Mem Hosp	0	0		1	1
Left Paraduodenal Hernia: An Uncommon Cause of Acute Abdomen	2011	WOS:000299403000008	Geriatrics & Gerontology	International Journal of Gerontology	1873-9598	0.184	1	0	Mackay Memoral Hospital	FM	Mackay Mem Hosp	0	0		1	1																			1		1		1
EARLY MENARCHE AND ISCHEMIC STROKE RISK AMONG POSTMENOPAUSAL WOMEN	2010	WOS:000277754800003	Geriatrics & Gerontology	International Journal of Gerontology	1873-9598	0.375	0	0	Mackay Memoral Hospital	Publ Hlth	Taipei Med Univ	0	0		1	1	1										1
Adhering to a Tai Chi Chuan Exercise Program Improves Vascular Resistance and Cardiac Function	2011	WOS:000299403000004	Geriatrics & Gerontology	International Journal of Gerontology	1873-9598	0.184	1	1	Mackay Memoral Hospital	FM	Mackay Mem Hosp	0	0		1	0
Is the Metabolic Syndrome Associated with Cardiovascular Disease, Diabetes Mellitus, and Increased Physical Limitations in an Elderly Population if Multiple Chronic Illnesses are Taken into Consideration?	2011	WOS:000299403000003	Geriatrics & Gerontology	International Journal of Gerontology	1873-9598	0.184	0	1	National Taiwan University & Hospital	Psychi	Natl Taiwan Univ Hosp	0	0		1	1	1				1
Fatigue Among Older Advanced Cancer Patients	2011	WOS:000293492700004	Geriatrics & Gerontology	International Journal of Gerontology	1873-9598	0.184	0	0	Taipei Medical University & Hospital	Palliative care	Taipei Med Univ Hosp	0	0		1	1						1																										1
Delayed Diagnosis in an Elderly Patient With Atypical Presentation of Peripheral Artery Occlusion Disease	2011	WOS:000289603900012	Geriatrics & Gerontology	International Journal of Gerontology	1873-9598	0.184	1	0	Mackay Memoral Hospital	FM	Mackay Mem Hosp	0	0		0	1																					1
The Effects of Xylocaine Spray for Pain Control Caused by Endotracheal Tube in Critical Care	2012	WOS:000303370100003	Geriatrics & Gerontology	International Journal of Gerontology	1873-9598	0.235	0	0	Mackay Memoral Hospital	Critical care	Mackay Mem Hosp	0	0		0	1													1								1	1
Effectiveness of Comprehensive Geriatric Assessment-Based Intervention to Reduce Frequent Emergency Department Visits: A Report of Four Cases	2012	WOS:000307261300014	Geriatrics & Gerontology	International Journal of Gerontology	1873-9598	0.235	0	0	Kaohsiung Veterans General Hospital	Emergency	Kaohsiung Vet Gen Hosp	0	0		1	1					1						1										1
Factors Associated with Depressive Mood in the Elderly Residing at the Long-Term Care Facilities	2012	WOS:000303370100002	Geriatrics & Gerontology	International Journal of Gerontology	1873-9598	0.235	1	0	Taipei Medical University & Hospital	FM	Taipei Med Univ, Shuang Ho Hosp	0	0		1	1						1									1																	1
Primary cutaneous diffuse large B cell lymphoma relapsed solely as a huge lung tumor mimicking a primary pulmonary lymphoma	2010	WOS:000273746200014	Hematology	International Journal of Hematology	0925-5710	1.324	0	0	Armed Forces General Hospital	Internal Med	Taichung Armed Forces Gen Hosp	0	0		1	1																		1		1
Early-life indoor environmental exposures increase the risk of childhood asthma	2011	WOS:000299134600002	Public, Environmental & Occupational Health	International Journal of Hygiene and Environmental Health	1438-4639	3.809	1	0	Taipei City Hospital	FM	Taipei City Hosp	0	0		1	1	1
			Infectious Diseases
Effects of ambient air pollution on pulmonary function among schoolchildren	2011	WOS:000295553600004	Public, Environmental & Occupational Health	International Journal of Hygiene and Environmental Health	1438-4639	3.809	0	0	National Taiwan University & Hospital	Publ Hlth	Natl Taiwan Univ Hosp	0	0		1	1	1	1
			Infectious Diseases
Non-invasive and transdermal measurement of blood uric acid level in human by electroporation and reverse iontophoresis	2010	WOS:000284397200001	Nanoscience & Nanotechnology	International Journal of Nanomedicine	1176-9114	4.976	0	0	Puli Christian Hospital	NA	Puli Christian Hosp	0	0		1	1										1							1
			Pharmacology & Pharmacy
The pregnancy health and birth outcomes of women who underwent assisted reproductive technology: Results of a national survey	2011	WOS:000297549900001	Obstetrics & Gynecology	Iranian Journal of Reproductive Medicine	1680-6433	0.257	0	1	Minist Hlth & Welf, Taichung Hospital	Nursing	Chung Shan Med Univ	0	0		1	1
									Chung Shan Medical University & Hospital
A Computer-assisted Model for Predicting Probability of Dying Within 7 Days of Hospice Admission in Patients with Terminal Cancer	2010	WOS:000277448600010	Oncology	Japanese Journal of Clinical Oncology	0368-2811	1.858	1	1	Buddhist Tzu Chi General Hospital	FM	Buddhist Dalin Tzu Chi Gen Hosp	0	0		1	1					1
									National Cheng Kung University & Hospital
									National Taiwan University & Hospital
The effect of music on biochemical markers and self-perceived stress among first-line nurses: a randomized controlled crossover trial	2011	WOS:000296418500012	Nursing	Journal of Advanced Nursing	0309-2402	1.477	0	0	Buddhist Tzu Chi General Hospital	Nursing	Buddhist Tzu Chi Gen Hosp	0	0		0	1
Pharmacokinetics and Urine Metabolite Identification of Dehydroevodiamine in the Rat	2012	WOS:000300644100001	Agriculture, Multidisciplinary	Journal of Agricultural and Food Chemistry	0021-8561	2.906	0	0	Taipei City Hospital	中醫	Natl Res Inst	0	0		1	1
			Chemistry, Applied
			Food Science & Technology
Treatment of Constipation in Long-Term Care with Chinese Herbal Formula: A Randomized, Double-Blind Placebo-Controlled Trial	2011	WOS:000292183600011	Integrative & Complementary Medicine	Journal of Alternative and Complementary Medicine	1075-5535	1.585	1	0	National Taiwan University & Hospital	FM	Natl Taiwan Univ Hosp	0	0		1	1			1
Risk factors for mortality in patients with persistent methicillin-resistant Staphylococcus aureus bacteraemia in a tertiary care hospital in Taiwan	2010	WOS:000280018400038	Infectious Diseases	Journal of Antimicrobial Chemotherapy	0305-7453	4.659	0	0	Taipei City Hospital	Internal Med	Taipei Cty Hosp	0	0		1	1																				1		1
			Microbiology
			Pharmacology & Pharmacy
Arterial Stiffness is Strongly Associated with Insulin Resistance in Chinese - A Population-Based Study (Taichung Community Health Study, TCHS)	2011	WOS:000287818500006	Peripheral Vascular Disease	Journal of Atherosclerosis and Thrombosis	1340-3478	2.692	1	1	China Medical University Hospital	FM	China Med Univ Hosp	1	USA	North America	1	1			1	1				1
Resveratrol Protects Human Endothelium from H2O2-Induced Oxidative Stress and Senescence via SirT1 Activation	2010	WOS:000282824600009	Peripheral Vascular Disease	Journal of Atherosclerosis and Thrombosis	1340-3478	2.293	0	0	Taipei Veterans General Hospital	Rehabilitation	Taipei Vet Gen Hosp	0	0		1	1					1			1															1
Arterial Stiffness Measured as Pulse Wave Velocity is Highly Correlated with Coronary Atherosclerosis in Asymptomatic Patients	2011	WOS:000297672800003	Peripheral Vascular Disease	Journal of Atherosclerosis and Thrombosis	1340-3478	2.692	1	1	China Medical University Hospital	FM	China Med Univ Hosp	0	0		1	1	1			1
Prehypertension Among Middle-Aged and Elderly People in Taiwan: A Five-Year Follow-Up	2010	WOS:000278405800009	Peripheral Vascular Disease	Journal of Atherosclerosis and Thrombosis	1340-3478	2.293	1	1	Taipei Veterans General Hospital	FM	Taipei Vet Gen Hosp	0	0		0	1	1				1
Niacinamide mitigated the acute lung injury induced by phorbol myristate acetate in isolated rat's lungs	2012	WOS:000302099500001	Medicine, Research & Experimental	Journal of Biomedical Science	1021-7770	2.458	0	0	Taoyuan General Hospital	NA	Natl Dong Hwa Univ	0	0		1	1
Heat-Stress Responses Modulate Beta-Adrenergic Agonist and Angiotensin II Effects on the Arrhythmogenesis of Pulmonary Vein Cardiomyocytes	2011	WOS:000287240200011	Cardiac & Cardiovascular Systems	Journal of Cardiovascular Electrophysiology	1045-3873	3.064	0	0	St Marys Hosp	CV	Chi Mei Med Ctr	0	0		1	1								1
Rosiglitazone Inhibits Monocyte/Macrophage Adhesion Through De Novo Adiponectin Production in Human Monocytes	2010	WOS:000280537200014	Biochemistry & Molecular Biology	Journal of Cellular Biochemistry	0730-2312	3.122	1	0	National Taiwan University & Hospital	FM	Natl Taiwan Univ Hosp	0	0		1	1					1															1
			Cell Biology
Homocysteine Induces Smooth Muscle Cell Proliferation Through Differential Regulation of Cyclins A and D1 Expression	2011	WOS:000287258800017	Cell Biology	Journal of Cellular Physiology	0021-9541	3.874	1	0	Buddhist Tzu Chi General Hospital	FM	Buddhist Dalin Tzu Chi Gen Hosp	0	0		1	1								1
			Physiology
Ganoderma lucidum polysaccharides prevent platelet-derived growth factor-stimulated smooth muscle cell proliferation in vitro and neointimal hyperplasia in the endothelial-denuded artery in vivo	2012	WOS:000303391000012	Cell Biology	Journal of Cellular Physiology	0021-9541	4.218	0	0	National Taiwan University & Hospital	Anat	Natl Taiwan Univ	0	0		1	1																							1							1
			Physiology
International Society for Clinical Densitometry Official Positions: Asia-Pacific Region Consensus	2010	WOS:000283892400004	Endocrinology & Metabolism	Journal of Clinical Densitometry	1094-6950	2.321	0	0	National Cheng Kung University & Hospital	NA	Univ Hong Kong	1	USA	North America	1	1																	1	1					1							1
													Canada	North America
													Hong Kong	Asia
													South Korea	Asia
													Malaysia	Asia
Who Can Pass the ISCD Professional Certification Course? The 8-Yr Experience in Taiwan	2011	WOS:000287426500002	Endocrinology & Metabolism	Journal of Clinical Densitometry	1094-6950	1.295	1	1	National Cheng Kung University & Hospital	FM	Natl Cheng Kung Univ Hosp	0	0		1	1																	1													1	1
Increased Arterial Stiffness in Subjects with Impaired Glucose Tolerance and Newly Diagnosed Diabetes But Not Isolated Impaired Fasting Glucose	2012	WOS:000302787800022	Endocrinology & Metabolism	Journal of Clinical Endocrinology & Metabolism	0021-972X	6.43	1	1	National Cheng Kung University & Hospital	FM	Natl Cheng Kung Univ Hosp	0	0		0	0
Increased Fetuin-A Concentrations in Impaired Glucose Tolerance with or without Nonalcoholic Fatty Liver Disease, But Not Impaired Fasting Glucose	2012	WOS:000312003900075	Endocrinology & Metabolism	Journal of Clinical Endocrinology & Metabolism	0021-972X	6.43	0	1	National Cheng Kung University & Hospital	Internal Med	Natl Cheng Kung Univ Hosp	0	0		0	1																				1
Trends in death rate from diabetes according to multiple-cause-of-death differed from that according to underlying-cause-of-death in Taiwan but not in the United States, 1987-2007	2012	WOS:000302447500017	Health Care Sciences & Services	Journal of Clinical Epidemiology	0895-4356	5.332	1	0	Kaohsiung Municipal Min Shen Hosp	FM	Kaohsiung Municipal Min Shen Hosp	0	0		1	1	1
			Public, Environmental & Occupational Health
Rs 6313 Polymorphism in 5-Hydroxytryptamine Receptor 2A Gene Association With Polysymptomatic Primary Nocturnal Enuresis	2010	WOS:000284914700002	Medical Laboratory Technology	Journal of Clinical Laboratory Analysis	0887-8013	1.031	0	0	China Medical University Hospital	pediatrics	China Med Univ Hosp	0	0		1	1
Central nervous system involvement in hepatocellular carcinoma: Clinical characteristics and comparison of intracranial and spinal metastatic groups	2011	WOS:000287636500013	Clinical Neurology	Journal of Clinical Neuroscience	0967-5868	1.247	1	0	Chang Gung Memorial Hospital	FM	Chang Gung Mem Hosp	0	0		0	1											1										1
			Neurosciences
Exploring the components of metabolic syndrome with respect to gender difference and its relationship to health-promoting lifestyle behaviour: a study in Taiwanese urban communities	2010	WOS:000282874400010	Nursing	Journal of Clinical Nursing	0962-1067	1.228	0	0	Taipei Veterans General Hospital	Nursing	Natl Yang Ming Univ	0	0		0	1
Human herpesvirus type 8 in patients with cirrhosis independent of thrombocytopenia	2010	WOS:000275189800012	Pathology	Journal of Clinical Pathology	0021-9746	2.475	0	0	Buddhist Tzu Chi General Hospital	GI	Buddhist Dalin Tzu Chi Gen Hosp	0	0		0	1															1
Antidepressant Use and the Risk of Upper Gastrointestinal Bleeding in Psychiatric Patients A Nationwide Cohort Study in Taiwan	2012	WOS:000306115300012	Pharmacology & Pharmacy	Journal of Clinical Psychopharmacology	0271-0749	3.513	1	0	National Taiwan University & Hospital	FM	Natl Taiwan Univ Hosp	0	0		1	1	1																			1
			Psychiatry
Professional Development is Enhanced by Serving as a Mini-CEX Preceptor	2011	WOS:000298483900002	Education, Scientific Disciplines	Journal of Continuing Education in the Health Professions	0894-1912	1.521	1	1	China Medical University Hospital	FM	China Med Univ Hosp	0	0		1	1			1																	1
			Health Care Sciences & Services
Elevated risk of second primary cancer in patients with cutaneous malignant melanoma: A nationwide cohort study in Taiwan	2010	WOS:000285859700006	Dermatology	Journal of Dermatological Science	0923-1811	3.712	0	0	Taipei Veterans General Hospital	Derma	Taipei Vet Gen Hosp	0	0		1	1	1
Repeated measurements for assessment of urinary 2-naphthol levels in individuals exposed to polycyclic aromatic hydrocarbons	2011	WOS:000291805600007	Engineering, Environmental	Journal of Environmental Science and Health Part a-Toxic/Hazardous Substances & Environmental Engineering	1093-4529	1.19	0	1	Kaohsiung Medical University & Hospital	NA	Old Dominion Univ	1	USA	North America	1	1		1
			Environmental Sciences
Prescription patterns of Chinese herbal products for menopausal syndrome: Analysis of a nationwide prescription database	2011	WOS:000297387000029	Plant Sciences	Journal of Ethnopharmacology	0378-8741	3.014	0	0	Taipei Veterans General Hospital	中醫	Chang Gung Mem Hosp	1	Germany	Europe	1	1			1	1																								1
			Chemistry, Medicinal
			Integrative & Complementary Medicine
			Pharmacology & Pharmacy
Carthamus tinctorius L. prevents LPS-induced TNF alpha signaling activation and cell apoptosis through JNK1/2-NF kappa B pathway inhibition in H9c2 cardiomyoblast cells	2010	WOS:000280869900008	Plant Sciences	Journal of Ethnopharmacology	0378-8741	2.466	0	0	China Medical University Hospital	Chinese Pharmaceut Sci	China Med Univ Hosp	0	0		1	1								1										1			1
			Chemistry, Medicinal
			Integrative & Complementary Medicine
			Pharmacology & Pharmacy
Cost-effectiveness analysis for Pap smear screening and human papillomavirus DNA testing and vaccination	2011	WOS:000298042600005	Health Care Sciences & Services	Journal of Evaluation in Clinical Practice	1356-1294	1.229	1	0	Hsin Chu Gen Hosp	FM	Hsin Chu Gen Hosp	1	England	Europe	1	1	1		1
			Medical Informatics
			Medicine, General & Internal
Anti-IL-20 monoclonal antibody inhibits the differentiation of osteoclasts and protects against osteoporotic bone loss	2011	WOS:000294329600011	Immunology	Journal of Experimental Medicine	0022-1007	13.857	0	0	National Cheng Kung University & Hospital	Dept Biochem & Mol Biol	Natl Cheng Kung Univ	0	0		0	1
			medicine
			Research & Experimental
Lower prevalence of hypercholesterolemia and hyperglyceridemia found in subjects with seropositivity for both Hepatitis B and C strains independently	2010	WOS:000283597900011	Gastroenterology & Hepatology	Journal of Gastroenterology and Hepatology	0815-9319	2.41	1	0	Kaohsiung Medical University & Hospital	FM	Kaohsiung Med Univ	0	0		1	1		1													1
Community-based screening for hepatocellular carcinoma in elderly residents in a hepatitis B- and C-endemic area	2011	WOS:000285765800024	Gastroenterology & Hepatology	Journal of Gastroenterology and Hepatology	0815-9319	2.865	1	0	Chang Gung Memorial Hospital	FM	Kaohsiung Chang Gung Mem Hosp	0	0		1	1															1
Prevalence of gastroesophageal reflux disease in a general population in Taiwan	2011	WOS:000292478200012	Gastroenterology & Hepatology	Journal of Gastroenterology and Hepatology	0815-9319	2.865	1	0	Kaohsiung Medical University & Hospital	FM	Kaohsiung Med Univ	0	0		1	1	1	1													1
Diabetes mellitus correlates with increased risk of pancreatic cancer: A population-based cohort study in Taiwan	2012	WOS:000301924800014	Gastroenterology & Hepatology	Journal of Gastroenterology and Hepatology	0815-9319	3.325	0	0	China Medical University Hospital	Internal Med	China Med Univ	0	0		1	1	1																										1
Community-based cross-sectional study: The association of lipids with hepatitis C seropositivity and diabetes mellitus	2012	WOS:000310554000009	Gastroenterology & Hepatology	Journal of Gastroenterology and Hepatology	0815-9319	3.325	0	0	St Joseph Hosp	Nursing	Tajen Univ	0	0		1	1															1
									Chang Gung Memorial Hospital
Screening Depression Among Institutionalized Older Chinese Men by Minimum Data Set: We Need a New Instrument	2011	WOS:000298855400001	Geriatrics & Gerontology	Journal of Geriatric Psychiatry and Neurology	0891-9887	3.067	0	1	Taipei Veterans General Hospital	Neuro	Kaohsiung Vet Gen Hosp	0	0		1	1					1						1									1
			Psychiatry
			Clinical Neurology
Exposure to volatile organic compounds and kidney dysfunction in thin film transistor liquid crystal display (TFT-LCD) workers	2010	WOS:000278056300125	Engineering	Journal of Hazardous Materials	0304-3894	3.723	0	0	China Medical University Hospital	Publ Hlth	China Med Univ	0	0		1	1	1	1
			Environmental Sciences
			Civil
High melamine migration in daily-use melamine-made tableware	2011	WOS:000289334300047	Engineering	Journal of Hazardous Materials	0304-3894	4.173	0	1	Kaohsiung Medical University & Hospital	Occupat Safety & Hlth	Kaohsiung Med Univ	0	0		1	1		1																									1
			Environmental Sciences
			Civil
Spatial variations of the aerosols in river-dust episodes in central Taiwan	2010	WOS:000278626700137	Engineering	Journal of Hazardous Materials	0304-3894	3.723	1	1	Chung Shan Medical University & Hospital	FM	Chung Shan Med Univ	0	0		1	1	1	1
			Environmental Sciences
			Civil
Varicella zoster virus infection among healthcare workers in Taiwan: seroprevalence and predictive value of history of varicella infection	2012	WOS:000299324400011	Infectious Diseases	Journal of Hospital Infection	0195-6701	2.855	1	0	Changhua Christian Hospital	FM	Changhua Christian Hosp	0	0		1	1														1	1
Angiotensin-converting enzyme inhibitor/angiotensin II receptor blockers and pneumonia risk among stroke patients	2012	WOS:000309897600024	Peripheral Vascular Disease	Journal of Hypertension	0263-6352	3.806	1	0	En Chu Kong Hosp	FM	En Chu Kong Hosp	0	0		1	1	1						1
Effectiveness of a stress-relief initiative for primary caregivers of adolescents with intellectual disability	2010	WOS:000274240100005	education, Scientific Disciplines	Journal of Intellectual & Developmental Disability	1366-8250	1.347	0	0	Tri-Service General Hospital	Publ Hlth	Natl Def Med Ctr	0	0		1	1	1			1
			Rehabilitation
Prostaglandin I-2 Analogs Suppress Tumor Necrosis Factor alpha Production and the Maturation of Human Monocyte-Derived Dendritic Cells	2011	WOS:000295117800020	medicine	Journal of Investigative Medicine	1081-5589	1.964	1	0	Armed Forces General Hospital	FM	Zuoying Armed Force Gen Hosp	0	0		1	1																																1
			General & Internal
			Research & Experimental
Establishing a 'physician's spiritual well-being scale' and testing its reliability and validity	2011	WOS:000285190600002	Medical Ethics	Journal of Medical Ethics	0306-6800	1.363	0	0	Taipei Veterans General Hospital	Psychi	Mackay Mem Hosp	1	Australia	Oceania	1	1						1	1				1
			Social Issues
			special science
			biomedical
A Health Examination System Integrated with Clinical Decision Support System	2010	WOS:000281703200005	Health Care Sciences & Services	Journal of Medical Systems	0148-5598	1.064	1	0	Taipei City Hospital	FM	Taipei City Hosp	0	0		1	1			1
			Medical Informatics
A Rule-Based Clinical Decision Model to Support Interpretation of Multiple Data in Health Examinations	2011	WOS:000297914200004	Health Care Sciences & Services	Journal of Medical Systems	0148-5598	1.132	1	1	Taipei City Hospital	FM	Taipei City Hosp	0	0		1	1			1
			Medical Informatics
Hepatitis B Surface Antigen Confirmatory Testing for Diagnosis of Hepatitis B Virus Infection in Taiwan	2011	WOS:000292600100004	Virology	Journal of Medical Virology	0146-6615	2.82	0	0	Taoyuan General Hospital	Pathology	Far Eastern Mem Hosp	0	0		1	1	1													1
									Taoyuan Vet Hosp
Aboriginal Taiwanese Hepatitis B Carriers Have More Favorable Viral Factors Than Han Chinese Carriers	2011	WOS:000292061200005	Virology	Journal of Medical Virology	0146-6615	2.82	1	0	National Taiwan University & Hospital	FM	Natl Taiwan Univ Hosp	0	0		1	1																				1
Spinal Tuberculosis in Non-HIV-Infected Patients: 10 Year Experience of a Medical Center in Central Taiwan	2010	WOS:000286016700002	Immunology	Journal of Microbiology Immunology and Infection	1684-1182	1.116	1	0	China Medical University Hospital	FM	China Med Univ Hosp	0	0		0	1														1
			Infectious Diseases
			Microbiology
Lemierre syndrome complicating multiple brain abscesses caused by extended-spectrum beta-lactamase-producing Klebsiella pneumoniae cured by fosfomycin and meropenem combination therapy	2012	WOS:000301903600012	Immunology	Journal of Microbiology Immunology and Infection	1684-1182	1.631	0	0	Taipei Medical University & Hospital	Infection	Taipei Med Univ, Wan Fang Hosp	0	0		1	1														1
			Infectious Diseases
			Microbiology
Heat stress responses modulate calcium regulations and electrophysiological characteristics in atrial myocytes	2010	WOS:000275835700026	Cardiac & Cardiovascular Systems	Journal of Molecular and Cellular Cardiology	0022-2828	5.499	0	0	St Marys Hosp	Biomed Engn	Natl Def Med Ctr	0	0		1	1								1
			Cell Biology
Effects of Age, Gender, and Socio-Economic Status on the Incidence of Spinal Cord Injury: An Assessment Using the Eleven-Year Comprehensive Nationwide Database of Taiwan	2012	WOS:000301442900016	Critical Care Medicine	Journal of Neurotrauma	0897-7151	4.295	0	0	Taipei Veterans General Hospital	NS	Taipei Vet Gen Hosp	1	Germany	Europe	1	1			1	1																								1
			Clinical Neurology										USA	North America
			Neurosciences
The Relationship Between Nutritional Status and Physical Function, Admission Frequency, Length of Hospital Stay, and Mortality in Old People Living in Long-Term Care Facilities	2012	WOS:000304201400005	Nursing	Journal of Nursing Research	1682-3141	0.578	0	0	Taipei Veterans General Hospital	Med Res	Natl Taiwan Univ Hosp	0	0		1	1
The Efficacy of Using Self-Monitoring Diaries in a Weight Loss Program for Chronically III Obese Adults in a Rural Area	2012	WOS:000308136300004	Nursing	Journal of Nursing Research	1682-3141	0.578	0	0	National Cheng Kung University & Hospital	Nursing	Natl Cheng Kung Univ	1	USA	North America	1	1
Thigh muscle volume predicted by anthropometric measurements and correlated with physical function in the older adults	2011	WOS:000291653200002	Geriatrics & Gerontology	Journal of Nutrition Health & Aging	1279-7707	2.606	0	1	National Taiwan University & Hospital	Radio	Natl Taiwan Univ Hosp	0	0		1	1					1													1
			Nutrition & Dietetics
Co-Exposure to Noise, N,N-Dimethylformamide, and Toluene on 24-Hour Ambulatory Blood Pressure in Synthetic Leather Workers	2010	WOS:000271650200004	Environmental Sciences	Journal of Occupational and Environmental Hygiene	1545-9624	1.293	0	0	China Medical University Hospital	Publ Hlth	China Med Univ	0	0		1	1	1	1
			Public, Environmental & Occupational Health
Glycine N-Methyltransferase Affects Urinary 1-Hydroxypyrene and 8-Hydroxy-2 '-Deoxyguanosine Levels After PAH Exposure	2011	WOS:000292539600020	Public, Environmental & Occupational Health	Journal of Occupational and Environmental Medicine	1076-2752	2.062	0	0	Kaohsiung Medical University & Hospital	GU	Mackay Mem Hosp	1	USA	North America	1	1	1	1																									1
Occupational Exposure of Dentists to Extremely-low-frequency Magnetic Field	2011	WOS:000289331400010	Public, Environmental & Occupational Health	Journal of Occupational Health	1341-9145	1.55	0	0	Sin Lau Christian Hosp	Publ Hlth	Fu Jen Catholic Univ	0	0		1	1	1
Association Between Cardiovascular Autonomic Functions and Time to Death in Patients With Terminal Hepatocellular Carcinoma	2010	WOS:000277372800006	Health Care Sciences & Services	Journal of Pain and Symptom Management	0885-3924	2.646	1	0	Buddhist Tzu Chi General Hospital	FM	Buddhist Dalin Tzu Chi Gen Hosp	0	0		1	1											1
			Medicine, General & Internal
			Clinical Neurology
Significance of Symptom Clustering in Palliative Care of Advanced Cancer Patients	2010	WOS:000277372800004	Health Care Sciences & Services	Journal of Pain and Symptom Management	0885-3924	2.64	1	1	National Taiwan University & Hospital	FM	Natl Taiwan Univ Hosp	0	0		1	1					1	1	1
			Medicine, General & Internal
			Clinical Neurology
Can a Good Death and Quality of Life Be Achieved for Patients with Terminal Cancer in a Palliative Care Unit?	2010	WOS:000285295100008	Health Care Sciences & Services	Journal of Palliative Medicine	1096-6218	2.245	1	1	National Taiwan University & Hospital	FM	Natl Taiwan Univ Hosp	0	0		1	1					1		1
Symptom Patterns of Patients with Head and Neck Cancer in a Palliative Care Unit	2011	WOS:000290756700008	Health Care Sciences & Services	Journal of Palliative Medicine	1096-6218	1.849	1	1	Changhua Christian Hospital	FM	Changhua Christian Hosp	0	0		1	1				1
Impact of Combined Hospice Care on Terminal Cancer Patients	2011	WOS:000291433700004	Health Care Sciences & Services	Journal of Palliative Medicine	1096-6218	1.849	1	1	Chang Gung Memorial Hospital	FM	Chang Gung Mem Hosp	0	0		0	1																1
What Factors Are Important in Increasing Junior Doctors' Willingness To Provide Palliative Care in Taiwan? An Educational Intervention Study	2010	WOS:000282953900013	Health Care Sciences & Services	Journal of Palliative Medicine	1096-6218	2.245	1	0	N Coast Jin Shan Hosp	FM	N Coast Jin Shan Hosp	0	0		0	1
									National Taiwan University & Hospital
Correlates of Fatigue Phenomenon in Palliative Care Patients with Advanced Cancers in Taiwan	2012	WOS:000306328700007	Health Care Sciences & Services	Journal of Palliative Medicine	1096-6218	1.891	1	1	National Taiwan University & Hospital	FM	Natl Taiwan Univ Hosp	0	0		1	1				1	1		1
Predictive Value of Serum Uric Acid Levels for the Diagnosis of Metabolic Syndrome in Adolescents	2012	WOS:000309516400038	Pediatrics	Journal of Pediatrics	0022-3476	4.035	0	0	Cardinal Tien Hospital	Internal Med	Cardinal Tien Hosp	0	0		1	1																	1	1		1
Impact of uremic environment on peritoneum: A proteomic view	2012	WOS:000303136600006	Biochemical Research Methods	Journal of Proteomics	1874-3919	4.088	0	0	Chi Mei Medical Center	Nephro	Chi Mei Med Ctr	0	0		1	1													1										1
The relationship between psychiatric symptoms and glycemic status in a Chinese population	2012	WOS:000306536100013	Psychiatry	Journal of Psychiatric Research	0022-3956	4.066	1	1	National Cheng Kung University & Hospital	FM	Natl Cheng Kung Univ Hosp	0	0		0	0
Disease-specific quality-of-life measures as predictors of mortality in individuals living with type 2 diabetes	2011	WOS:000286952600007	Psychiatry	Journal of Psychosomatic Research	0022-3999	3.296	0	1	China Medical University Hospital	中醫	China Med Univ Hosp	0	0		1	1			1				1										1
Admission rates and in-hospital mortality for hip fractures in England 1998 to 2009: time trends study	2011	WOS:000291064800019	Public, Environmental & Occupational Health	Journal of Public Health	1741-3842	2.063	1	1	Taipei City Hospital	FM	Taipei City Hosp	1	England	Europe	1	1	1																														1
Trace metals analysis of hair samples from students in metropolitan area high schools	2011	WOS:000293029200029	Chemistry, Analytical	Journal of Radioanalytical and Nuclear Chemistry	0236-5731	1.52	0	0	PoJen General Hospital	Radio	Po Jen Gen Hosp	0	0		1	1																		1	1
			Chemistry, Inorganic & Nuclear
			Nuclear Science & Technology
Gene Transfer of IGF1 Attenuates Hepatocellular Apoptosis After Bile Duct Ligation	2011	WOS:000289407800054	Surgery	Journal of Surgical Research	0022-4804	2.247	1	0	PoJen General Hospital	FM	Po Jen Gen Hosp	0	0		1	1																							1				1	1
Methodology for Adding Glycemic Index to the National Health and Nutrition Examination Survey Nutrient Database	2012	WOS:000310819200019	Nutrition & Dietetics	Journal of the Academy of Nutrition and Dietetics	2212-2672	0	1	1	Taichung Veterans General Hospital	FM	Taichung Vet Gen Hosp	1	USA	North America	1	1
The risk of cancer in patients with psoriasis: A population-based cohort study in Taiwan	2011	WOS:000292222200011	Dermatology	Journal of the American Academy of Dermatology	0190-9622	3.991	0	0	Taipei Veterans General Hospital	Derma	Taichung Vet Gen Hosp	0	0		1	1	1																			1
Comorbidity profiles among patients with alopecia areata: The importance of onset age, a nationwide population-based study	2011	WOS:000296268000005	Dermatology	Journal of the American Academy of Dermatology	0190-9622	3.991	0	0	Taipei Veterans General Hospital	Derma	Taipei Vet Gen Hosp	0	0		1	1	1
Relationships between Alanine Aminotransferase Levels, Abnormal Liver Echogenicity, and Metabolic Syndrome	2011	WOS:000292499800011	Primary Health Care	Journal of the American Board of Family Medicine	1557-2625	2.053	1	0	Cardinal Tien Hospital	FM	Cardinal Tien Hosp	1	Peoples R China	Asia	1	1																				1
			Medicine, General & Internal
Subclinical Hypothyroidism Is Associated With Increased Risk for All-Cause and Cardiovascular Mortality in Adults	2012	WOS:000307463800005	Cardiac & Cardiovascular Systems	Journal of the American College of Cardiology	0735-1097	14.086	0	1	China Medical University Hospital	FM	Natl Taiwan Univ Hosp	0	0		1	1			1	1																1
									National Taiwan University & Hospital
Statins, Risk of Diabetes, and Implications on Outcomes in the General Population	2012	WOS:000309508400005	Cardiac & Cardiovascular Systems	Journal of the American College of Cardiology	0735-1097	14.086	0	0	Taipei Veterans General Hospital	CV	Taipei Vet Gen Hosp	0	0		1	1				1				1
Reevaluating the Diagnostic Criteria for Metabolic Syndrome in the Taiwanese Population	2011	WOS:000208685400003	Nutrition & Dietetics	Journal of the American College of Nutrition	0731-5724	2.29	0	0	Chang Gung Memorial Hospital	Occupat Med	Chang Gung Mem Hosp	0	0		1	1		1
Larger Body Mass Index and Waist Circumference Are Associated with Lower Mortality in Chinese Long-Term Care Facility Residents	2010	WOS:000283950100006	Geriatrics & Gerontology	Journal of the American Geriatrics Society	0002-8614	3.913	1	1	National Taiwan University & Hospital	FM	Asia Univ	1	USA	North America	1	1			1	1
			Gerontology
Predicting Mortality of Older Residents in Long-Term Care Facilities: Comorbidity or Care Problems?	2010	WOS:000283333500005	Geriatrics & Gerontology	Journal of the American Medical Directors Association	1525-8610	4.492	1	1	Taipei Veterans General Hospital	FM	Taipei Vet Gen Hosp	0	0		0	1
Diabetes Mellitus, Glycemic Control, and Pneumonia in Long-Term Care Facilities: A 2-Year, Prospective Cohort Study	2011	WOS:000286550900008	Geriatrics & Gerontology	Journal of the American Medical Directors Association	1525-8610	4.645	1	1	Taipei Veterans General Hospital	FM	Taipei Vet Gen Hosp	0	0		1	1					1
Effectiveness of Short-Term Interdisciplinary Intervention on Postacute Patients in Taiwan	2011	WOS:000286550900007	Geriatrics & Gerontology	Journal of the American Medical Directors Association	1525-8610	4.645	1	1	Taipei Veterans General Hospital	FM	Yuanshan Vet Hosp	0	0		1	1
Prevalence and Related Factors of Do-Not-Resuscitate Directives Among Nursing Home Residents in Taiwan	2010	WOS:000280452100011	Geriatrics & Gerontology	Journal of the American Medical Directors Association	1525-8610	4.492	1	0	St Joseph Hosp	FM	St Joseph Hosp	0	0		1	1					1		1
Seroprevalence of Antibodies to Pandemic (H1N1) 2009 Influenza Virus Among Hospital Staff in a Medical Center in Taiwan	2010	WOS:000275568200003	Medicine	Journal of the Chinese Medical Association	1726-4901	0.678	0	0	Taipei Veterans General Hospital	Infection	Taipei Vet Gen Hosp	0	0		1	1	1													1	1						1	1
			General & Internal
Giant branching aneurysmal aberrant systemic artery for intralobar pulmonary sequestration: Computed tomographic depiction of arterial and bronchial anomaly	2011	WOS:000294974600010	Medicine	Journal of the Chinese Medical Association	1726-4901	0.787	0	0	Taipei Veterans General Hospital	Radio	Taipei Vet Gen Hosp	0	0		1	1																		1					1
			General & Internal
Subcutaneous and Scrotal Emphysema Following Suprapubic Cystostomy in a Patient With Colovesical Fistula	2010	WOS:000278783900010	Medicine	Journal of the Chinese Medical Association	1726-4901	0.678	1	0	Changhua Christian Hospital	FM	Changhua Christian Hosp	0	0		1	1													1														1
			General & Internal
Prescriptions of Chinese Herbal Medicine for Constipation Under the National Health Insurance in Taiwan	2010	WOS:000280674000007	Medicine	Journal of the Chinese Medical Association	1726-4901	0.678	0	0	Taipei Veterans General Hospital	Chinese Medicine	Taipei Vet Gen Hosp	0	0		1	1
			General & Internal
Impact of advanced age on inpatients with pyogenic liver abscess in Taiwan: A nationwide claim-based analysis	2011	WOS:000299405700004	Medicine	Journal of the Chinese Medical Association	1726-4901	0.787	1	1	Taipei Veterans General Hospital	FM	Natl Yang Ming Univ Hosp	0	0		1	1															1
			General & Internal						National Yang Ming University & Hospital
Characteristics of human immunodeficiency virus infections among the elderly in Taiwan: A nationwide study	2011	WOS:000290887700007	Medicine	Journal of the Chinese Medical Association	1726-4901	0.787	1	1	Taipei Veterans General Hospital	FM	Natl Yang Ming Univ Hosp	0	0		1	1																				1
			General & Internal						National Yang Ming University & Hospital
Factors Influencing the Intention to Utilize Out-of-Pocket Health Checkup Services: A Sample of Citizens From 12 Townships of Taichung County in Taiwan	2010	WOS:000278783900007	Medicine	Journal of the Chinese Medical Association	1726-4901	0.68	0	0	Fung Yuan Hosp	Hlth Care Adm	Cent Taiwan Univ Sci & Technol	0	0		1	1				1
			General & Internal
The benefits of body weight loss on health-related quality of life	2011	WOS:000289598200006	Medicine	Journal of the Chinese Medical Association	1726-4901	0.787	1	1	Kaohsiung Veterans General Hospital	FM	Kaohsiung Vet Gen Hosp	1	USA	North America	1	1							1
			General & Internal
The ecology of medical care in Taiwan	2011	WOS:000296215500005	Medicine	Journal of the Chinese Medical Association	1726-4901	0.787	1	1	Taipei Veterans General Hospital	FM	Taipei Vet Gen Hosp	0	0		1	1				1
			General & Internal
High-surgical-volume hospitals associated with better quality and lower cost of kidney transplantation in Taiwan	2011	WOS:000288056800005	Medicine	Journal of the Chinese Medical Association	1726-4901	0.787	0	0	Taipei Veterans General Hospital	GS	Taipei Vet Gen Hosp	0	0		1	1				1																			1
			General & Internal
High Risk of Renal Failure in Stage 3B Chronic Kidney Disease is Under-recognized in Standard Medical Screening	2010	WOS:000284137600005	Medicine	Journal of the Chinese Medical Association	1726-4901	0.678	0	0	Taichung Veterans General Hospital	Nephro	Taichung Vet Gen Hosp	0	0		1	1	1												1
			General & Internal
Constipation in Taiwan elementary school students: A nationwide survey	2011	WOS:000288643300002	Medicine	Journal of the Chinese Medical Association	1726-4901	0.787	0	0	Taipei Veterans General Hospital	GI	Taipei Vet Gen Hosp	0	0		1	1	1														1
			General & Internal
Differences in serum biochemistry between breast-fed and formula-fed infants	2011	WOS:000298209400007	Medicine	Journal of the Chinese Medical Association	1726-4901	0.787	0	0	Taipei Veterans General Hospital	GI	Taipei Vet Gen Hosp	0	0		1	1															1
			General & Internal
Pattern and Consequences of First Visits to Obstetricians/gynecologists by Adolescents: A Nationwide Study in Taiwan	2010	WOS:000276431100005	Medicine	Journal of the Chinese Medical Association	1726-4901	0.678	1	1	Taipei Veterans General Hospital	FM	Taipei Vet Gen Hosp	1	Germany	Europe	1	1			1	1																										1
			General & Internal										USA	North America
Interrelationships between romance, life quality, and medical training of female residents	2012	WOS:000308617300008	Medicine	Journal of the Chinese Medical Association	1726-4901	0.752	1	1	National Cheng Kung University & Hospital	FM	Natl Cheng Kung Univ Hosp	0	0		1	1
			General & Internal
Prevalence and Correlates of Geriatric Frailty in a Northern Taiwan Community	2011	WOS:000290645900006	Medicine	Journal of the Formosan Medical Association	0929-6646	1.132	0	1	National Taiwan University & Hospital	Publ Hlth	Natl Hlth Res Inst	0	0		1	1	1		1		1
			General & Internal
Polymorphism of microsomal epoxide hydrolase is associated with chronic obstructive pulmonary disease and bronchodilator response	2011	WOS:000298209300003	Medicine	Journal of the Formosan Medical Association	0929-6646	1.132	0	0	National Cheng Kung University & Hospital	Chinese Medicine	Natl Cheng Kung Univ Med Coll & Hosp	0	0		1	1												1
			General & Internal
Self-efficacy Affects Blood Sugar Control Among Adolescents With Type I Diabetes Mellitus	2010	WOS:000280416800004	Medicine	Journal of the Formosan Medical Association	0929-6646	1.125	1	1	National Taiwan University & Hospital	FM	Natl Taiwan Univ	0	0		1	1
			General & Internal
Stepwise Relationship Between Components of Metabolic Syndrome and Risk of Colorectal Adenoma in a Taiwanese Population Receiving Screening Colonoscopy	2011	WOS:000288479900006	Medicine	Journal of the Formosan Medical Association	0929-6646	1.132	1	1	Shin Kong Wu Ho Su Mem Hosp	FM	Shin Kong Wu Ho Su Mem Hosp	0	0		1	1		1													1
			General & Internal
Increased Risk of Mortality From Overweight and Obesity in Middle-aged Individuals From Six Communities in Taiwan	2011	WOS:000291081200003	Medicine	Journal of the Formosan Medical Association	0929-6646	1.132	1	0	Mackay Memoral Hospital	FM	Mackay Mem Hosp	0	0		1	1	1			1
			General & Internal
Expressed Emotion and its Relationship to Adolescent Depression and Antisocial Behavior in Northern Taiwan	2010	WOS:000275568100006	Medicine	Journal of the Formosan Medical Association	0929-6646	1.125	1	0	National Taiwan University & Hospital	FM	Natl Taiwan Univ Hosp	0	0		1	1	1			1
			General & Internal
Is the Blood Donated by Habitual Nut Quid Chewers Suitable for Use in Transfusion?	2010	WOS:000275568100003	Medicine	Journal of the Formosan Medical Association	0929-6646	1.125	1	0	Tungs Taichung MetroHarbor Hosp	FM	Tungs Taichung MetroHarbor Hosp	0	0		1	1
			General & Internal
Decreased Retinol Binding Protein 4 Concentrations are Associated With Cholesterol Gallstone Disease	2010	WOS:000279268200003	Medicine	Journal of the Formosan Medical Association	0929-6646	1.125	0	0	Taipei Medical University & Hospital	Surgery	Kaohsiung Municipal Hsiaokang Hosp	0	0		1	1																			1				1
			General & Internal
Efficacy of intrathecal drug delivery system for refractory cancer pain patients: A single tertiary medical center experience	2012	WOS:000305596400004	Medicine	Journal of the Formosan Medical Association	0929-6646	1	0	0	Cathay General Hospital	Anesthesiol	Natl Taiwan Univ Hosp	0	0		1	1																1																	1
			General & Internal
Ten-year trends in hospital admissions for adverse drug reactions in England 1999-2009	2010	WOS:000279514000014	Medicine	Journal of the Royal Society of Medicine	0141-0768	1.366	1	1	Taipei City Hospital	FM	Taipei City Hosp	1	England	Europe	1	1	1
			General & Internal
Impact of the New Lung Cancer Staging System for a Predominantly Advanced-Disease Patient Population	2010	WOS:000275134300009	Oncology	Journal of Thoracic Oncology	1556-0864	4.04	0	0	China Medical University Hospital	Radiat Oncol	China Med Univ Hosp	0	0		1	1												1				1		1								1						1
			respiratory system
Evaluation of the value of rapid D-dimer test in conjunction with cardiac troponin I test for early risk stratification of myocardial infarction	2010	WOS:000283578200012	Hematology	Journal of Thrombosis and Thrombolysis	0929-5305	1.539	1	0	Chang Gung Memorial Hospital	FM	Chang Gung Mem Hosp	1	USA	North America	1	1	1				1																1
			Peripheral Vascular Disease
Risk Factors for Hip Fracture Sites and Mortality in Older Adults	2011	WOS:000292607400041	Critical Care Medicine	Journal of Trauma-Injury Infection and Critical Care	0022-5282	2.478	0	0	National Taiwan University & Hospital	Ortho	Natl Taiwan Univ Hosp	0	0		1	1					1																										1
			Surgery
Travel-Related Mosquito-Transmitted Disease Questionnaire Survey among Health Professionals in Taiwan	2011	WOS:000285891800005	medicine	Journal of Travel Medicine	1195-1982	1.748	1	1	National Taiwan University & Hospital	FM	atl Taiwan Univ Hosp	0	0		0	0
			General & Internal
Use of Quantitative Ultrasound for Identifying Low Bone Density in Older People	2010	WOS:000279480400009	Acoustics	Journal of Ultrasound in Medicine	0278-4297	1.246	1	0	Taipei Medical University & Hospital	FM	Taipei Med Univ Hosp	0	0		1	1	1
			Radiology
			Nuclear Medicine & Medical Imaging
Joint Effect of Arsenic Methylation Profile and NNK Metabolites on Urothelial Carcinoma	2012	WOS:000310438600012	Urology & Nephrology	Journal of Urology	0022-5347	3.696	0	0	Taipei Medical University & Hospital	GU	Shuang Ho Hosp	0	0		1	1	1																										1
Risks of Nocturia in Patients with Chronic Kidney Disease-Do the Metabolic Syndrome and its Components Matter?	2012	WOS:000311581400094	Urology & Nephrology	Journal of Urology	0022-5347	3.696	0	0	Taipei Medical University & Hospital	Nephro	Shuang Ho Hosp	0	0		1	1													1							1							1
Gender-Specific Association Between Self-reported Sleep Duration and Falls in High-Functioning Older Adults	2010	WOS:000273701200012	Geriatrics & Gerontology	Journals of Gerontology Series a-Biological Sciences and Medical Sciences	1079-5006	3.988	0	0	Chi Mei Medical Center	Internal Med	Natl Taiwan Univ Hosp	0	0		1	1					1															1
			Gerontology
A TAIWANESE BOY WITH CONGENITAL GENERALIZED LIPODYSTROPHY CAUSED BY HOMOZYGOUS ILE262FS MUTATION IN THE BSCL2 GENE	2010	WOS:000285081800006	medicine	Kaohsiung Journal of Medical Sciences	1607-551X	0.474	1	0	Kaohsiung Medical University & Hospital	FM	Kaohsiung Med Univ Hosp	0	0		1	1																	1				1
			Research & Experimental
Low exposure to melamine increases the risk of urolithiasis in adults	2011	WOS:000294891400012	Urology & Nephrology	Kidney International	0085-2538	6.606	0	1	Kaohsiung Medical University & Hospital	GU	Kaohsiung Med Univ Hosp	0	0		1	1	1	1																									1
Related factors for Rectosigmoid Hyperplastic Polyps: A Hospital-Based Study	2011	WOS:000297967400008	medicine	Kuwait Medical Journal	0023-5776	0.051	1	0	China Medical University Hospital	FM	China Med Univ Hosp	0	0		1	1																				1
			General & Internal
Risk of ovarian cancer in women with pelvic inflammatory disease: a population-based study	2011	WOS:000294293500021	Oncology	Lancet Oncology	1470-2045	22.589	0	0	Taipei Medical University & Hospital	Biostat & Res Consultat Ctr	Taipei Med Univ	0	0		1	1			1			1																										1
Atorvastatin correlates with decreased risk of esophageal cancer: a population-based case-control study from Taiwan	2012	WOS:000307455500001	medicine	Libyan Journal of Medicine	1993-2820	0.585	1	0	China Medical University Hospital	FM	China Med Univ Hosp	0	0		1	1	1			1																1
			General & Internal
Statins use and female lung cancer risk in Taiwan	2012	WOS:000312906600001	medicine	Libyan Journal of Medicine	1993-2820	0.585	1	0	China Medical University Hospital	FM	China Med Univ Hosp	0	0		1	1				1																1
			General & Internal
Sports injury and the role of medical diagnostic devices	2010	WOS:000283454200018	Biology	Life Science Journal-Acta Zhengzhou University Overseas Edition	1097-8135	0.158	0	1	Armed Forces General Hospital	Engineering	Cheng Shiu University	0	0		1	1
Acquirement and disappearance of HBsAg and anti-HCV in an aged population: a follow-up study in an endemic township	2011	WOS:000292467000010	Gastroenterology & Hepatology	Liver International	1478-3223	3.824	0	0	Chang Gung Memorial Hospital	Publ Hlth	Natl Cheng Kung Univ	0	0		1	1	1														1
Non-steroidal anti-inflammatory drugs use and risk of upper gastrointestinal adverse events in cirrhotic patients	2012	WOS:000302468700021	Gastroenterology & Hepatology	Liver International	1478-3223	3.87	1	0	Cathay General Hospital	FM	Cathay Gen Hosp	0	0		1	1	1							1												1
Biodegradable Glutaraldehyde-crosslinked Casein Conduit Promotes Regeneration after Peripheral Nerve Injury in Adult Rats	2011	WOS:000292540900007	Biochemistry & Molecular Biology	Macromolecular Bioscience	1616-5187	3.886	0	0	China Medical University Hospital	Chinese Medicine	China Med Univ	0	0		1	1																		1										1
			Materials Science
			biometerials
			Polymer Science
Impact of Cuts in Reimbursement on Outcome of Acute Myocardial Infarction and Use of Percutaneous Coronary Intervention A Nationwide Population-based Study Over the Period 1997 to 2008	2011	WOS:000297222500003	Health Care Sciences & Services	Medical Care	0025-7079	3.411	1	0	Cardinal Tien Hospital	FM	Cardinal Tien Hosp	0	0		1	1				1
			Health Policy & Services
			public
			Environmental & Occupational Health
Stress, personal characteristics and burnout among first postgraduate year residents: a nationwide study in Taiwan	2010	WOS:000277097000014	education	Medical Teacher	0142-159X	1.494	1	0	National Taiwan University & Hospital	FM	Natl Taiwan Univ Hosp	0	0		1	1
			Scientific Disciplines
			Health Care Sciences & Services
Polypharmacy Correlates With Increased Risk for Hip Fracture in the Elderly A Population-Based Study	2010	WOS:000281616600003	medicine	Medicine	0025-7974	4.256	1	0	China Medical University Hospital	FM	China Med Univ Hosp	0	0		1	1	1																			1
			General & Internal
Relationship of Blood Pressure and Cardiovascular Disease Risk Factors in Normotensive Middle-Aged Men	2011	WOS:000294466500008	medicine	Medicine	0025-7974	4.35	0	0	Fu Jen Catholic Univ	Internal Med	Fu Jen Catholic Univ	0	0		1	1																	1	1		1
			General & Internal						National Cheng Kung University & Hospital
Sleep duration is a potential risk factor for newly diagnosed type 2 diabetes mellitus	2011	WOS:000291076100009	Endocrinology & Metabolism	Metabolism-Clinical and Experimental	0026-0495	2.664	1	1	Min Sheng General Hospital	FM	Min Sheng Gen Hosp	0	0		1	0
									National Cheng Kung University & Hospital
Serum uric acid and metabolic syndrome in Taiwanese adults	2010	WOS:000278341500006	Endocrinology & Metabolism	Metabolism-Clinical and Experimental	0026-0495	2.538	1	1	Shin Kong Wu Ho Su Mem Hosp	FM	Shin Kong Wu Ho Su Mem Hosp	0	0		1	1		1
Protein nitration is associated with increased proteolysis in skeletal muscle of bile duct ligation-induced cirrhotic rats	2010	WOS:000276189200003	Endocrinology & Metabolism	Metabolism-Clinical and Experimental	0026-0495	2.538	1	0	Taichung Veterans General Hospital	FM	Taichung Vet Gen Hosp	0	0		1	1																	1
Obesity and diabetic hyperglycemia were associated with serum alanine aminotransferase activity in patients with hepatitis B infection	2010	WOS:000276189200006	Endocrinology & Metabolism	Metabolism-Clinical and Experimental	0026-0495	2.538	1	0	Taichung Veterans General Hospital	FM	Taichung Vet Gen Hosp	0	0		1	1																	1
The effects of group health education on childbearing knowledge, attitude, and behaviour among Southeast Asian immigrant women in Taiwan	2012	WOS:000311936100016	Nursing	Midwifery	0266-6138	1.116	0	0	Yuans Gen Hosp	Nursing	Kaohsiung Med Univ	0	0		1	1
Celecoxib induces heme oxygenase-1 expression in macrophages and vascular smooth muscle cells via ROS-dependent signaling pathway	2011	WOS:000286614900005	Pharmacology & Pharmacy	Naunyn-Schmiedebergs Archives of Pharmacology	0028-1298	2.647	0	1	National Taiwan University & Hospital	Pharm	Natl Taiwan Univ	0	0		1	1																				1
Association of betel nut chewing with chronic kidney disease: A retrospective 7-year study in Taiwan	2011	WOS:000297414300012	Urology & Nephrology	Nephrology	1320-5358	1.311	0	0	Chia Yi Christian Hospital	Nephro	Chia Yi Christian Hosp	0	0		1	1				1								1	1
Impact of metabolic syndrome on the incidence of chronic kidney disease: A Chinese cohort study	2012	WOS:000306646700002	Urology & Nephrology	Nephrology	1320-5358	1.686	0	0	Mackay Memoral Hospital	Hlth Business Adm	Meiho Univ	0	0		1	1	1																						1
Electrolysed-reduced water dialysate improves T-cell damage in end-stage renal disease patients with chronic haemodialysis	2010	WOS:000281483300054	Transplantation	Nephrology Dialysis Transplantation	0931-0509	3.564	1	0	National Taiwan University & Hospital	FM	Natl Taiwan Univ	1	Japan	Asia	1	1																				1
			Urology & Nephrology
Comparison of low-dose deferoxamine versus standard-dose deferoxamine for treatment of aluminium overload among haemodialysis patients	2010	WOS:000276994400042	Transplantation	Nephrology Dialysis Transplantation	0931-0509	3.564	0	0	Chi Mei Medical Center	Nephro	Chi Mei Med Ctr	0	0		1	1			1										1
			Urology & Nephrology
Differential proteomic characterization between normal peritoneal fluid and diabetic peritoneal dialysate	2010	WOS:000280027400039	Transplantation	Nephrology Dialysis Transplantation	0931-0509	3.564	0	1	Chi Mei Medical Center	Nephro	Chi Mei Med Ctr	0	0		1	1		1	1										1							1			1
			Urology & Nephrology
Malignancies after renal transplantation in Taiwan: a nationwide population-based study	2012	WOS:000300421300058	Transplantation	Nephrology Dialysis Transplantation	0931-0509	3.371	0	0	Taipei Veterans General Hospital	Derma	Taipei Vet Gen Hosp	0	0		1	1	1
			Urology & Nephrology
Danthron Induces DNA Damage and Inhibits DNA Repair Gene Expressions in GBM 8401 Human Brain Glioblastoma Multiforms Cells	2010	WOS:000278411000018	Biochemistry & Molecular Biology	Neurochemical Research	0364-3190	2.608	0	0	Taichung Veterans General Hospital	Pathology	Cheng Hsin Gen Hosp	0	0		1	1																				1
			Neurosciences
Danthron Induced Apoptosis Through Mitochondria- and Caspase-3-Dependent Pathways in Human Brain Glioblastoma Multiforms GBM 8401 Cells	2010	WOS:000274403600005	Biochemistry & Molecular Biology	Neurochemical Research	0364-3190	2.608	0	0	Taichung Veterans General Hospital	Pathology	Cheng Hsin Gen Hosp	0	0		1	1
			Neurosciences
Urinary Incontinence: An Under-Recognized Risk Factor for Falls Among Elderly Dementia Patients	2011	WOS:000294727800017	Urology & Nephrology	Neurourology and Urodynamics	0733-2467	2.958	1	0	Kaohsiung Medical University & Hospital	FM	Kaohsiung Med Univ Hosp	0	0		0	1		1			1						1
Sleep disorder in Taiwanese nurses: A random sample survey	2011	WOS:000298096800014	Nursing	Nursing & Health Sciences	1441-0745	0.684	0	0	Buddhist Tzu Chi General Hospital	Nursing	Buddhist Tzu Chi Gen Hosp	0	0		0	1												1
Micronutrients and lifestyles in Taiwanese patients with stage 3 to 5 chronic kidney disease	2010	WOS:000276332100006	Nutrition & Dietetics	Nutrition	0899-9007	2.726	0	0	Taipei Medical University & Hospital	Internal Med	Shin Kong Wu Ho Su Mem Hosp	0	0		1	1	1												1
Serum selenium concentration is associated with metabolic factors in the elderly: a cross-sectional study	2010	WOS:000278315800001	Nutrition & Dietetics	Nutrition & Metabolism	1743-7075	2.349	1	1	National Taiwan University & Hospital	FM	Natl Taiwan Univ Hosp	0	0		1	1
Wild bitter gourd improves metabolic syndrome: A preliminary dietary supplementation trial	2012	WOS:000302228600001	Nutrition & Dietetics	Nutrition Journal	1475-2891	2.648	1	0	Cheng Ching Hosp	FM	Cheng Ching Hosp	0	0		1	1
Relationship between serum uric acid and cerebral white matter lesions in the elderly	2012	WOS:000300398300017	Cardiac & Cardiovascular Systems	Nutrition Metabolism and Cardiovascular Diseases	0939-4753	3.978	1	0	N Coast Jin Shan Hosp	FM	N Coast Jin Shan Hosp	0	0		1	1					1													1		1
			Endocrinology & Metabolism
			Nutrition & Dietetics
Predictive equation of resting energy expenditure in obese adult Taiwanese	2011	WOS:000306956100006	Endocrinology & Metabolism	Obesity Research & Clinical Practice	1871-403X	0.324	1	1	China Medical University Hospital	FM	China Med Univ Hosp	0	0		1	1				1
			Nutrition & Dietetics
Mortality from liver cancer and leukaemia among polyvinyl chloride workers in Taiwan: an updated study	2011	WOS:000286223300009	Public, Environmental & Occupational Health	Occupational and Environmental Medicine	1351-0711	3.02	1	0	Cathay General Hospital	FM	Cathay Gen Hosp	0	0		1	1	1	1		1
Polycyclic aromatic hydrocarbon-induced oxidative stress and lipid peroxidation in relation to immunological alteration	2011	WOS:000293787700005	Public, Environmental & Occupational Health	Occupational and Environmental Medicine	1351-0711	3.02	0	1	Kaohsiung Medical University & Hospital	Community & Environm Hlth	Old Dominion Univ	1	USA	North America	1	1	1	1
Prolonged time to pregnancy in residents exposed to ionising radiation in cobalt-60-contaminated buildings	2010	WOS:000275447500009	Public, Environmental & Occupational Health	Occupational and Environmental Medicine	1351-0711	3.494	0	1	Kaohsiung Medical University & Hospital	Community & Environm Hlth	Old Dominion Univ	1	USA	North America	1	1	1	1
Fall mechanisms, bone strength, and hip fractures in elderly men and women in Taiwan	2011	WOS:000293650600018	Endocrinology & Metabolism	Osteoporosis International	0937-941X	4.58	0	0	Taipei Medical University & Hospital	Nursing	Natl Taipei Univ Nursing & Hlth Sc	0	0		1	1	1																				1
Risk factors for hip fracture in older adults: a case-control study in Taiwan	2010	WOS:000276075600009	Endocrinology & Metabolism	Osteoporosis International	0937-941X	4.859	0	0	National Taiwan University & Hospital	Geriatric	Natl Hlth Res Inst	0	0		1	1					1													1													1
The effect of soy isoflavone on bone mineral density in postmenopausal Taiwanese women with bone loss: a 2-year randomized double-blind placebo-controlled study	2012	WOS:000303392700009	Endocrinology & Metabolism	Osteoporosis International	0937-941X	4.039	0	0	National Cheng Kung University & Hospital	Geriatric	Natl Hlth Res Inst	0	0		1	1					1												1
Art therapy for terminal cancer patients in a hospice palliative care unit in Taiwan	2012	WOS:000309995900007	Health Policy & Services	Palliative & Supportive Care	1478-9515	0.978	1	1	Taipei Veterans General Hospital	FM	Taipei Vet Gen Hosp	0	0		0	1					1										1
Diagnostic value of Her-2/neu, Cyfra 21-1, and carcinoembryonic antigen levels in malignant pleural effusions of lung adenocarcinoma	2010	WOS:000276085300005	Pathology	Pathology	0031-3025	2.16	1	0	Buddhist Tzu Chi General Hospital	FM	Buddhist Dalin Tzu Chi Gen Hosp	0	0		1	1												1
Acute-Phase Reactants and a Supplemental Diagnostic Aid for Kawasaki Disease	2010	WOS:000284157400014	Cardiac & Cardiovascular Systems	Pediatric Cardiology	0172-0643	1.237	0	0	Yuans Gen Hosp	Radiat Oncol	Kaohsiung Med Univ Hosp	1	USA	North America	1	1	1																															1
			Pediatrics
Correlation Between Ventriculoperitoneal Shunts and Inguinal Hernias in Children: An 8-Year Follow-up	2011	WOS:000292299500016	Pediatrics	Pediatrics	0031-4005	5.437	1	0	Taipei Veterans General Hospital	FM	Taipei Vet Gen Hosp	1	Germany	Europe	1	1			1	1																								1
Neuromyelitis Optica: A Case Report	2010	WOS:000285529600008	Pediatrics	Pediatrics and Neonatology	1875-9572	0.747	1	0	Chi Mei Medical Center	FM	Chi Mei Med Ctr	0	0		0	1
Psychogenic Urinary Retention in Children: A Case Report	2010	WOS:000282925400010	Pediatrics	Pediatrics and Neonatology	1875-9572	0.747	0	0	Taipei City Hospital	pediatrics	Taipei City Hosp	0	0		1	1							1																				1
Evaluation of a Streptococcal Pharyngitis Score in Southern Taiwan	2012	WOS:000301911100010	Pediatrics	Pediatrics and Neonatology	1875-9572	0.932	1	0	Fooyin Univ Hosp	FM	Fooyin Univ Hosp	0	0		0	1
THE EFFECT OF WEATHER ON PERITONEAL DIALYSIS (PD) PRESCRIPTION: SEASONAL VARIATION IN PD DIALYSATE UTILIZATION	2010	WOS:000277089500011	Urology & Nephrology	Peritoneal Dialysis International	0896-8608	1.477	0	0	Taipei Veterans General Hospital	Nephro	Taipei Med Univ & Hosp	0	0		1	1													1
MINI-LAPAROTOMY IMPLANTATION OF PERITONEAL DIALYSIS CATHETERS: OUTCOME AND RESCUE	2010	WOS:000281721100008	Urology & Nephrology	Peritoneal Dialysis International	0896-8608	1.477	0	0	National Taiwan University & Hospital	Surgery	Natl Taiwan Univ Hosp	0	0		0	1													1										1
Utilization of antidepressants in Taiwan: a nationwide population-based survey from 2000 to 2009	2012	WOS:000308295000009	Pharmacology & Pharmacy	Pharmacoepidemiology and Drug Safety	1053-8569	2.897	0	0	Cathay General Hospital	Psychi	Natl Taiwan Univ Hosp	0	0		1	1	1						1
									Cardinal Tien Hospital
Demonstrating the pharmacogenetic effects of angiotensin-converting enzyme inhibitors on long-term prognosis of diastolic heart failure	2010	WOS:000273876100006	Genetics & Heredity	Pharmacogenomics Journal	1470-269X	4.306	0	0	Mackay Memoral Hospital	CV	Natl Taiwan Univ Hosp	0	0		1	1								1												1
			Pharmacology & Pharmacy
Inhibitory Effects of Citronellol and Geraniol on Nitric Oxide and Prostaglandin E-2 Production in Macrophages	2010	WOS:000283917300006	Plant Sciences	Planta Medica	0032-0943	2.369	0	0	Taipei City Hospital	Mol Biol	Natl Yang Ming Univ	0	0		1	1
			Chemistry, Medicinal
			Pharmacology & Pharmacy
Association of Alpha B-Crystallin Genotypes with Oral Cancer Susceptibility, Survival, and Recurrence in Taiwan	2011	WOS:000294802500003	Multidisciplinary Sciences	Plos One	1932-6203	4.092	0	0	China Medical University Hospital	Canc Res	China Med Univ Hosp	0	0		0	1
An Efficient Strategy for Broad-Range Detection of Low Abundance Bacteria without DNA Decontamination of PCR Reagents	2011	WOS:000291052200050	Multidisciplinary Sciences	Plos One	1932-6203	4.092	0	0	Chang Gung Memorial Hospital	FM	Chang Gung Mem Hosp	0	0		1	1																					1
Academic Impact of a Public Electronic Health Database: Bibliometric Analysis of Studies Using the General Practice Research Database	2011	WOS:000292033700077	Multidisciplinary Sciences	Plos One	1932-6203	4.092	1	1	Taipei Veterans General Hospital	FM	Taipei Vet Gen Hosp	1	Germany	Europe	1	1	1			1																								1
													England	Europe
Differential White Blood Cell Count and Type 2 Diabetes: Systematic Review and Meta-Analysis of Cross-Sectional and Prospective Studies	2010	WOS:000283045300009	Multidisciplinary Sciences	Plos One	1932-6203	4.411	0	0	Taipei Veterans General Hospital	Publ Hlth	Inst Metab Sci	1	England	Europe	1	1	1				1								1				1
									Kuang Tien Gen Hosp				USA	North America
													India	Asia
													Germany	Europe
													Sweden	Europe
													Thailand	Asia
													Italy	Europe
													Japan	Asia
													Peoples R China	Asia
													Bulgaria	Europe
Prospective Validation of American Diabetes Association Risk Tool for Predicting Pre-Diabetes and Diabetes in Taiwan-Taichung Community Health Study	2011	WOS:000295966900071	Multidisciplinary Sciences	Plos One	1932-6203	4.092	0	0	China Medical University Hospital	Publ Hlth	China Med Univ Hosp	0	0		1	1	1		1	1
Reduced Health-Related Quality of Life in Elders with Frailty: A Cross-Sectional Study of Community-Dwelling Elders in Taiwan	2011	WOS:000292293400037	Multidisciplinary Sciences	Plos One	1932-6203	4.092	1	1	China Medical University Hospital	FM	China Med Univ Hosp	0	0		1	1	1		1	1			1
Areca Users in Combination with Tobacco and Alcohol Use Are Associated with Younger Age of Diagnosed Esophageal Cancer in Taiwanese Men	2011	WOS:000296507500011	Multidisciplinary Sciences	Plos One	1932-6203	4.092	0	0	Kaohsiung Medical University & Hospital	Occupat Safety	Kaohsiung Med Univ Hosp	0	0		1	1		1																					1			1
Carrier Screening for Spinal Muscular Atrophy (SMA) in 107,611 Pregnant Women during the Period 2005-2009: A Prospective Population-Based Cohort Study	2011	WOS:000287764100026	Multidisciplinary Sciences	Plos One	1932-6203	4.092	0	0	Taoyuan General Hospital	Med Genet	Natl Taiwan Univ Hosp	0	0		1	1											1																			1
Application of Frequent Itemsets Mining to Analyze Patterns of One-Stop Visits in Taiwan	2011	WOS:000292293400001	Multidisciplinary Sciences	Plos One	1932-6203	4.092	1	1	Taoyuan Vet Hosp	FM	Taoyuan Vet Hosp	0	0		1	1				1
									Taipei Veterans General Hospital
Pulmonary Function and Incident Bronchitis and Asthma in Children: A Community-Based Prospective Cohort Study	2012	WOS:000304046900004	Multidisciplinary Sciences	Plos One	1932-6203	3.73	0	0	Taipei City Hospital	Publ Hlth	Natl Taiwan Univ Hosp	0	0		1	1	1	1
Major Depressive Disorder and Stroke Risks: A 9-Year Follow-Up Population-Based, Matched Cohort Study	2012	WOS:000309831500083	Multidisciplinary Sciences	Plos One	1932-6203	3.73	0	0	Taipei Veterans General Hospital	Psychi	Taipei Vet Gen Hosp	0	0		0	1							1
Central Obesity and Albuminuria: Both Cross-Sectional and Longitudinal Studies in Chinese	2012	WOS:000313236200003	Multidisciplinary Sciences	Plos One	1932-6203	3.73	1	1	China Medical University Hospital	FM	China Med Univ Hosp	1	USA	North America	1	1			1																	1
Long-Term Mortality of Patients with Septic Ocular or Central Nervous System Complications from Pyogenic Liver Abscess: A Population-Based Study	2012	WOS:000303894900054	Multidisciplinary Sciences	Plos One	1932-6203	3.73	0	0	Taipei Veterans General Hospital	Infection	Taipei Vet Gen Hosp	0	0		0	1														1		1
Positive Association Between Hepatitis C Infection and Oral Cavity Cancer: A Nationwide Population-Based Cohort Study in Taiwan	2012	WOS:000310261800044	Multidisciplinary Sciences	Plos One	1932-6203	3.73	1	0	Taipei Medical University & Hospital	FM	Taipei Med Univ Hosp	0	0		1	1	1		1	1
									China Medical University Hospital
Cardiac Myosin Binding Protein C and MAP-Kinase Activating Death Domain-Containing Gene Polymorphisms and Diastolic Heart Failure	2012	WOS:000305347400038	Multidisciplinary Sciences	Plos One	1932-6203	3.73	0	0	Far Eastern Memoral Hospital	CV	Natl Taiwan Univ	0	0		1	1			1	1				1
Short sleep duration associated with a higher prevalence of metabolic syndrome in an apparently healthy population	2012	WOS:000310400400006	Public, Environmental & Occupational Health	Preventive Medicine	0091-7435	3.496	1	1	National Cheng Kung University & Hospital	FM	Natl Cheng Kung Univ Hosp	0	0		0	0
			Medicine, General & Internal
Association of area socioeconomic status with lung function in children	2012	WOS:000312974400036	Public, Environmental & Occupational Health	Preventive Medicine	0091-7435	3.496	1	0	Taipei City Hospital	FM	Taipei City Hosp	0	0		1	1	1																			1
			Medicine, General & Internal
Impact of Prostate-Specific Antigen (PSA) Nadir and Time to PSA Nadir on Disease Progression in Prostate Cancer Treated With Androgen-Deprivation Therapy	2011	WOS:000292332300006	Endocrinology & Metabolism	Prostate	0270-4137	3.485	0	0	Kaohsiung Medical University & Hospital	GU	Kaohsiung Med Univ Hosp	1	Hong Kong	Asia	1	1		1																									1
			Urology & Nephrology										USA	North America
Cigarette smoking in outpatients with chronic schizophrenia in Taiwan: Relationships to socio-demographic and clinical characteristics	2011	WOS:000298722900006	Psychiatry	Psychiatry Research	0165-1781	2.524	0	0	Armed Forces General Hospital	Psychi	Songshan Armed Forces Gen Hosp	0	0		1	1							1
Polypharmacy increases the risk of Parkinson's disease in older people in Taiwan: A population-based study	2011	WOS:000295136100004	Geriatrics & Gerontology	Psychogeriatrics	1346-3500	0	1	0	China Medical University Hospital	FM	China Med Univ Hosp	0	0		1	1	1			1																	1
			Psychiatry
Bereaved females are more likely to suffer from mood problems even if they do not meet the criteria for prolonged grief	2011	WOS:000295880900005	Oncology; Psychology	Psycho-Oncology	1057-9249	3.339	1	0	Kaohsiung Medical University & Hospital	FM	Kaohsiung Med Univ Hosp	0	0		1	1	1	1
			Psychology, Multidisciplinary						Kaohsiung Municipal Tatung Hospital
			Social Sciences, Biomedical
Nationwide periodic health examinations promote early treatment of hypertension, diabetes and hyperlipidemia in adults: Experience from Taiwan	2011	WOS:000289786600004	Public, Environmental & Occupational Health	Public Health	0033-3506	1.35	1	0	Armed Forces General Hospital	FM	Tao Yuan Armed Forces Gen Hosp	0	0		1	1	1		1
Pregnancy outcome of women in the vicinity of nuclear power plants in Taiwan	2010	WOS:000274549400007	Biology	Radiation and Environmental Biophysics	0301-634X	2.04	0	0	National Taiwan University & Hospital	NA	Asia Univ	0	0		1	1				1
			Biophysics
			Environmental Sciences
			Radiology, Nuclear Medicine & Medical Imaging
A Reference Equation for Objectively Adjusting Dwell Volume to Obtain More Ultrafiltration in Daily Practice of Peritoneal Dialysis	2010	WOS:000275111100007	Urology & Nephrology	Renal Failure	0886-022X	0.79	0	0	Chi Mei Medical Center	Nephro	Chi Mei Med Ctr	0	0		1	1				1									1							1
Risk of Acute Kidney Injury after Exposure to Gadolinium-Based Contrast in Patients with Renal Impairment	2011	WOS:000294118700002	Urology & Nephrology	Renal Failure	0886-022X	0.824	0	1	Chi Mei Medical Center	Nephro	Chi Mei Med Ctr	0	0		1	1				1									1							1
Developing and refining the Taiwan Birth Cohort Study (TBCS): Five years of experience	2011	WOS:000296304000078	Education, Special	Research in Developmental Disabilities	0891-4222	3.405	0	0	Chung Shan Medical University & Hospital	Neuro	Kaohsiung Med Univ	0	0		1	1							1				1
			Rehabilitation
The effectiveness of healthy physical fitness programs on people with intellectual disabilities living in a disability institution: Six-month short-term effect	2010	WOS:000276662400012	Education, Special	Research in Developmental Disabilities	0891-4222	3.201	0	0	Tri-Service General Hospital	NA	Chung Hua Fdn Persons Intellectual Disabil	0	0		1	1	1
			Rehabilitation
Quantifying morbidity burdens and medical utilization of children with intellectual disabilities in Taiwan: A nationwide study using the ACG case-mix adjustment system	2012	WOS:000303698500035	Education, Special	Research in Developmental Disabilities	0891-4222	2.483	0	1	Taipei Veterans General Hospital	NA	Taipei Vet Gen Hosp	0	0		0	1				1
			Rehabilitation
Cardiopulmonary resuscitation for hospital inpatients in Taiwan: An 8-year nationwide survey	2012	WOS:000301645700031	Critical Care Medicine	Resuscitation	0300-9572	4.104	1	1	Taipei Veterans General Hospital	FM	Taipei Vet Gen Hosp	0	0		0	1					1
			Emergency Medicine
Osteoprotegerin genetic polymorphisms and age of symptom onset in ankylosing spondylitis	2011	WOS:000286464100018	Rheumatology	Rheumatology	1462-0324	4.058	0	0	Tungs Taichung MetroHarbor Hosp	NA	Chung Shan Med Univ	0	0		1	1	1			1						1
Effects of genetic polymorphisms of programmed cell death 1 and its ligands on the development of ankylosing spondylitis	2011	WOS:000295172600012	Rheumatology	Rheumatology	1462-0324	4.058	0	1	Cent Taiwan Univ Sci & Technol	NA	Chung Shan Med Univ	0	0		1	1	1									1
									Chung Shan Medical University & Hospital
Monoarticular septic arthritis in a patient with juvenile rheumatoid arthritis under etanercept treatment	2012	WOS:000303434400043	Rheumatology	Rheumatology International	0172-8172	2.214	1	0	Chang Gung Memorial Hospital	FM	Chang Gung Mem Hosp	0	0		0	1
Characterization of road traffic noise exposure and prevalence of hypertension in central Taiwan	2011	WOS:000287435500007	Environmental Sciences	Science of the Total Environment	0048-9697	3.286	0	0	China Medical University Hospital	Publ Hlth	China Med Univ Hosp	0	0		0	1	1	1
Low ratio of 4-(methylnitrosamino)-1-(3-pyridyl)-1-butanol-glucuronides (NNAL-Gluc)/free NNAL increases urothelial carcinoma risk	2011	WOS:000288738900004	Environmental Sciences	Science of the Total Environment	0048-9697	3.286	0	0	Taipei Medical University & Hospital	Publ Hlth	Taipei Med Univ Hosp	0	0		1	1	1	1																									1
Protective effects of plasma alpha-tocopherols on the risk of inorganic arsenic-related urothelial carcinoma	2011	WOS:000287435500005	Environmental Sciences	Science of the Total Environment	0048-9697	3.286	0	0	Taipei Medical University & Hospital	Publ Hlth	Taipei Med Univ Hosp	0	0		1	1	1																										1
Gene polymorphisms of glutathione S-transferase omega 1 and 2, urinary arsenic methylation profile and urothelial carcinoma	2011	WOS:000286291600004	Environmental Sciences	Science of the Total Environment	0048-9697	3.286	0	0	Taipei Medical University & Hospital	Publ Hlth	Taipei Med Univ Hosp	0	0		1	1	1																										1
The relationship between obesity, insulin and arsenic methylation capability in Taiwan adolescents	2012	WOS:000300459500019	Environmental Sciences	Science of the Total Environment	0048-9697	3.258	1	0	Taipei Medical University & Hospital	FM	Taipei Med Univ Hosp	0	0		1	1	1																				1
Taiwan's National Health Insurance Research Database: administrative health care database as study object in bibliometrics	2011	WOS:000286496200011	Computer Science, Interdisciplinary Applications	Scientometrics	0138-9130	1.966	1	0	Taipei Veterans General Hospital	FM	Taipei Vet Gen Hosp	1	Germany	Europe	1	1			1	1																								1
			Information Science & Library Science
Scientific publications by anesthesia departments in East Asia	2012	WOS:000305686800010	Computer Science, Interdisciplinary Applications	Scientometrics	0138-9130	2.133	0	0	Taipei Veterans General Hospital	NA	Natl Def Med Ctr	0	0		1	1	1																																1
			Information Science & Library Science
PROGNOSTIC SIGNIFICANCE OF LEFT VENTRICULAR DIASTOLIC FUNCTION IN BURN PATIENTS	2012	WOS:000303010000002	Critical Care Medicine	Shock	1073-2322	2.612	0	0	Far Eastern Memoral Hospital	PS	Far Eastern Mem Hosp	0	0		0	1			1					1																1
			Hematology
			Surgery
			Peripheral Vascular Disease
Factors that influence the participation of healthcare professionals in advance care planning for patients with terminal cancer: A nationwide survey in Taiwan	2010	WOS:000278035000009	public	Social Science & Medicine	0277-9536	2.742	0	0	National Taiwan University & Hospital	Nursing	Natl Taiwan Univ Hosp	0	0		0	1
			Environmental & Occupational Health
			Social Sciences
			biometerials
The role of leader behaviors in hospital-based emergency departments' unit performance and employee work satisfaction	2011	WOS:000289911300016	public	Social Science & Medicine	0277-9536	2.699	0	1	China Medical University Hospital	Publ Hlth	China Med Univ	0	0		1	1	1			1																	1					1
			Environmental & Occupational Health
			Social Sciences
			biometerials
Incorporating frailty in a multi-state model: application to disease natural history modelling of adenoma-carcinoma in the large bowel	2010	WOS:000282430300007	Health Care Sciences & Services	Statistical Methods in Medical Research	0962-2802	1.768	0	0	Far Eastern Memoral Hospital	Publ Hlth	Natl Taiwan Univ	1	England	Europe	1	1	1
			Mathematical & Computational Biology
			Medical Informatics
			Statistics & Probability
A Community Mental Health Survey and Relief Program in Taiwan after the Great Earthquake-Implementation, Clinical Observation and Evaluation	2010	WOS:000283274800003	Psychiatry	Stress and Health	1532-3005	0.789	0	0	Puli Christian Hospital	Psychi	Natl Cheng Kung Univ Hosp	1	USA	North America	1	1							1				1
			Psychology
Association Between Mycoplasma Pneumonia and Increased Risk of Ischemic Stroke A Nationwide Study	2011	WOS:000295217100054	Clinical Neurology	Stroke	0039-2499	5.729	0	0	Taipei Veterans General Hospital	CV	Taipei Vet Gen Hosp	1	Germany	Europe	1	1			1	1				1
			Peripheral Vascular Disease
The Effect of Cuts in Reimbursement on Stroke Outcome A Nationwide Population-Based Study During the Period 1998 to 2007	2010	WOS:000274799600017	Clinical Neurology	Stroke	0039-2499	5.756	0	1	Cardinal Tien Hospital	Healthcare Informat & Management	Healthcare Informat & Management	0	0		1	1				1
			Peripheral Vascular Disease
Determinants of complicated grief in caregivers who cared for terminal cancer patients	2010	WOS:000281057100012	oncology	Supportive Care in Cancer	0941-4355	2.058	1	0	Kaohsiung Medical University & Hospital	FM	Kaohsiung Med Univ Hosp	0	0		0	1	1	1
			Health Care Sciences & Services
			Rehabilitation
Effectiveness of an e-Learning Curriculum on Occupational Health for Music Performers	2012	WOS:000308703300009	Health Care Sciences & Services	Telemedicine and E-Health	1530-5627	1.4	0	1	National Taiwan University & Hospital	Coll Liberal Arts	Natl Hsinchu Univ Educ	1	USA	North America	1	1			1
An Agile Enterprise Regulation Architecture for Health Information Security Management	2010	WOS:000281509900041	Health Care Sciences & Services	Telemedicine Journal and E-Health	1530-5627	1.297	0	0	National Taiwan University & Hospital	Grad Inst Elect Engn	Natl Taiwan Univ	0	0		1	1			1
The Strategic Use of Standardized Information Exchange Technology in a University Health System	2010	WOS:000276909000009	Health Care Sciences & Services	Telemedicine Journal and E-Health	1530-5627	1.297	0	0	National Taiwan University & Hospital	software engineering	Natl Kaohsiung Normal Univ	0	0		1	1			1
Comparison of clinical characteristics and performance of pneumonia severity score and CURB-65 among younger adults, elderly and very old subjects	2010	WOS:000283258800008	respiratory system	Thorax	0040-6376	6.525	1	0	Chang Gung Memorial Hospital	FM	Chang Gung Mem Hosp	1	USA	North America	1	1	1				1																1
A nation-wide analysis of venous thromboembolism in 497,180 cancer patients with the development and validation of a risk-stratification scoring system	2012	WOS:000307484000009	Hematology	Thrombosis and Haemostasis	0340-6245	6.094	0	0	Taipei Veterans General Hospital	hematology	Taipei Vet Gen Hosp	0	0		1	1			1	1												1
			Peripheral Vascular Disease
Adrenal Insufficiency in the Elderly: A Nationwide Study of Hospitalizations in Taiwan	2010	WOS:000280540000004	medicine	Tohoku Journal of Experimental Medicine	0040-8727	1.145	1	1	Taipei Veterans General Hospital	FM	Taipei Vet Gen Hosp	1	Germany	Europe	1	1			1	1
			General & Internal
			Research & Experimental
Calcitriol Treatment Attenuates Inflammation and Oxidative Stress in Hemodialysis Patients with Secondary Hyperparathyroidism	2011	WOS:000290129400001	medicine	Tohoku Journal of Experimental Medicine	0040-8727	1.244	0	0	Chi Mei Medical Center	Nephro	Tri Serv Gen Hosp	0	0		1	1													1
			General & Internal
			Research & Experimental
The polymorphisms of P53 codon 72 and MDM2 SNP309 and renal cell carcinoma risk in a low arsenic exposure area	2011	WOS:000297970900005	Pharmacology & Pharmacy	Toxicology and Applied Pharmacology	0041-008X	4.447	0	0	Taipei Medical University & Hospital	Grad Inst Clin Med	Taipei Med Univ	0	0		1	1	1																										1
			toxicology
Subclinical abnormalities in workers with continuous low-level toluene exposure	2011	WOS:000294229500003	public	Toxicology and Industrial Health	0748-2337	1.423	0	0	Kuang Tien Gen Hosp	occupat	Kuang Tien Gen Hosp	0	0		1	1		1									1
			Environmental & Occupational Health
			toxicology
Impact of pulmonary and extrapulmonary tuberculosis infection in kidney transplantation: a nationwide population-based study in Taiwan	2012	WOS:000309239500024	immunology	Transplant Infectious Disease	1398-2273	1.984	0	1	Taipei Veterans General Hospital	Nephro	Taipei Vet Gen Hosp	0	0		0	1			1							1			1	1		1
			Infectious Diseases
			Transplantation
Impact of shock wave lithotripsy on heart rate variability in patients with urolithiasis	2011	WOS:000288562700009	Urology & Nephrology	Urological Research	0300-5623	1.233	1	0	China Medical University Hospital	FM	China Med Univ Hosp	1	Canada	North America	1	1					1			1																			1			1			1
Protective effect of Flos carthami extract against ethylene glycol-induced urolithiasis in rats	2012	WOS:000310965700004	Urology & Nephrology	Urological Research	0300-5623	1.591	1	1	China Medical University Hospital	FM	China Med Univ Hosp	1	Peoples R China	Asia	1	1					1																						1			1
Absence of endemic measles transmission in a highly vaccinated population from 1999 to 2008: Implications of sustained measles elimination in Taiwan	2010	WOS:000280988600027	immunology	Vaccine	0264-410X	3.572	0	0	Chi Mei Medical Center	radiology	Chi Mei Med Ctr	0	0		1	1	1																	1				1											1
			medicine
			Research & Experimental
Immune response of single dose vaccination against 2009 pandemic influenza A (H1N1) in the Taiwanese elderly	2010	WOS:000282150700007	immunology	Vaccine	0264-410X	3.572	0	0	National Taiwan University & Hospital	Internal Med	Natl Taiwan Univ	0	0		1	1																				1
			medicine
			Research & Experimental
A clinical study to assess the immunogenicity and safety of a monovalent 2009 influenza A (H1N1) vaccine in an area with low-level epidemics of pandemic influenza	2010	WOS:000284026600015	immunology	Vaccine	0264-410X	3.572	0	0	National Taiwan University & Hospital	Internal Med	Natl Taiwan Univ Hosp	0	0		1	1																				1
			medicine
			Research & Experimental
The changing epidemiology of varicella incidence after implementation of the one-dose varicella vaccination policy	2011	WOS:000287777500015	immunology	Vaccine	0264-410X	3.766	0	0	Minist Hlth & Welf, Taichung Hospital	Grad Inst Stat & Informat Sci	Natl Changhua Univ Educ	0	0		1	1	1		1
			medicine
			Research & Experimental
Significance and anamnestic response in isolated hepatitis B core antibody-positive individuals 18 years after neonatal hepatitis B virus vaccination in Taiwan	2012	WOS:000305660800010	immunology	Vaccine	0264-410X	3.492	1	0	Taipei Medical University & Hospital	FM	Taipei Med Univ Hosp	0	0		1	1	1
			medicine
			Research & Experimental
Helicobacter pylori infection concomitant with metabolic syndrome further increase risk of colorectal adenomas	2010	WOS:000281007900016	Gastroenterology & Hepatology	World Journal of Gastroenterology	1007-9327	2.24	1	0	Buddhist Tzu Chi General Hospital	FM	Buddhist Tzu Chi Dalin Gen Hosp	1	New Zealand	Oceania	1	1
Cigarette smoking and alcohol drinking and esophageal cancer risk in Taiwanese women	2010	WOS:000276017200015	Gastroenterology & Hepatology	World Journal of Gastroenterology	1007-9327	2.24	1	1	Kaohsiung Medical University & Hospital	FM	Kaohsiung Med Univ Hosp	0	0		1	1		1													1	1							1
Prevalence and risk factors of asymptomatic peptic ulcer disease in Taiwan	2011	WOS:000288878200015	Gastroenterology & Hepatology	World Journal of Gastroenterology	1007-9327	2.471	1	0	Kaohsiung Veterans General Hospital	FM	Kaohsiung Vet Gen Hosp	0	0		1	1	1							1							1
Diagnostic Role of Procalcitonin in Patients with Suspected Appendicitis	2012	WOS:000305988400004	Surgery	World Journal of Surgery	0364-2313	2.228	0	0	Chang Gung Memorial Hospital	emergency	Chang Gung Mem Hosp	1	USA	North America	1	1	1																				1
Taiwanese Female Vegetarians Have Lower Lipoprotein-Associated Phospholipase A2 Compared with Omnivores	2011	WOS:000285571000002	medicine	Yonsei Medical Journal	0513-5796	1.137	0	0	Buddhist Tzu Chi General Hospital	CV	Buddhist Dalin Tzu Chi Gen Hosp	0	0		0	1								1
			General & Internal
Characterization of a new mouse p53 variant: loss-of-function and gain-of-function	2014	336057700001	Medicine, Research & Experimental	Journal of Biomedical Science	1021-7770	2.736	1	0	Tri-Service General Hospital	FM	Tri Serv Gen Hosp	0	0		0	1
Brain-derived neurotrophic factor (BDNF) Val66Met polymorphism affects sympathetic tone in a gender-specific way	2014	339694500003	Endocrinology & Metabolism	Psychoneuroendocrinology	0306-4530	5.591	0	0	Tri-Service General Hospital	Psychi	Tri Serv Gen Hosp	0	0		0	1							1
			Neurosciences
			Psychiatry
Grail as a molecular determinant for the functions of the tumor suppressor p53 in tumorigenesis	2013	WOS:000317264800007	Biochemistry & Molecular Biology	Cell Death and Differentiation	1350-9047	8.385	0	0	Tri-Service General Hospital	Lif Sci	Tri Serv Gen Hosp	1	USA	North America	1	1																1
			Cell Biology
Incidence of Cardiovascular Events in Which 2 Thiazolidinediones Are Used as Add-on Treatments for Type 2 Diabetes Mellitus in a Taiwanese Population	2011	WOS:000298831400005	Pharmacology & Pharmacy	Clinical Therapeutics	0149-2918	2.321	1	1	Tri-Service General Hospital	FM	Tri Serv Gen Hosp	0	0		0	0
First identification of methicillin-resistant Staphylococcus aureus MLST types ST5 and ST45 and SCCmec types IV and Vt by multiplex PCR during an outbreak m a respiratory care ward in central Taiwan	2011	WOS:000291135200003	Infectious Diseases	Diagnostic Microbiology and Infectious Disease	0732-8893	2.528	0	1	Chung Shan Medical University & Hospital	Infection	Chung Shan Med Univ Hosp	0	0		1	1														1
			microbiology
White blood cell count and psychomotor cognitive performance in the elderly	2011	WOS:000289253600007	Medicine, General & Internal	European Journal of Clinical Investigation	0014-2972	3.018	1	0	Tri-Service General Hospital	FM	Tri Serv Gen Hosp	1	USA	North America	1	1	1																			1
			Medicine, Research & Experimental
Community-acquired Streptococcus Viridans Pneumonia in a Healthy Child	2012	WOS:000303369400019	Pediatrics	Indian Pediatrics	0019-6061	1.036	1	0	Tri-Service General Hospital	FM	Tri Serv Gen Hosp	0	0		0	1
Difference of antihypertensive prescribing between office- and hospital-based clinics in Taiwan	2012	WOS:000309676500008	Pharmacology & Pharmacy	International Journal of Clinical Pharmacy	2210-7703	0.859	1	0	Tri-Service General Hospital	FM	Tri Serv Gen Hosp	0	0		1	1
Adherence to Available Clinical Practice Guidelines for Initiation of Antihypertensive Medication in Patients With or Without Diabetes Mellitus and Other Comorbidities in Taiwan	2012	WOS:000301964000013	Pharmacology & Pharmacy	Journal of Clinical Pharmacology	0091-2700	2.84	1	1	Tri-Service General Hospital	FM	Tri Serv Gen Hosp	0	0		0	1								1
Diacerein: A potential therapeutic drug for periodontal disease	2012	WOS:000306770700011	Medicine, Research & Experimental	Medical Hypotheses	0306-9877	1.054	0	0	Tri-Service General Hospital	Dentist	Tri Serv Gen Hosp	0	0		1	1
Relationship between Lung Function and Metabolic Syndrome	2014	WOS:000343941200030	Multidisciplinary Sciences	Plos One	1932-6203	3.534	1	1	Tri-Service General Hospital	FM	Tri Serv Gen Hosp	0	0		1	1		1
Sex-Specific Association Between Nerve Growth Factor Polymorphism and Cardiac Vagal Modulation	2014	WOS:000343883900008	Psychiatry	Psychosomatic Medicine	0033-3174	4.085	0	0	Tri-Service General Hospital	Psychiatry	Tri Serv Gen Hosp	0	0		0	1							1
			Psychology
			Multidisciplinary
Knowledge and attitudes regarding cervical cancer screening among women with physical disabilities living in the community	2012	WOS:000299403600010	Education	Research in Developmental Disabilities	0891-4222	2.483	1	0	Tri-Service General Hospital	FM	Tri Serv Gen Hosp	0	0		1	1	1			1
			Special
			Rehabilitation
Analysis of seasonal influenza vaccine uptake among children and adolescents with an intellectual disability	2012	WOS:000299403600050	Education	Research in Developmental Disabilities	0891-4222	2.483	0	0	Tri-Service General Hospital	Pub Heal	Tri Serv Gen Hosp	0	0		1	1	1	1		1
			Special
			Rehabilitation
The Characteristics of PM2.5 and Its Chemical Compositions between Different Prevailing Wind Patterns in Guangzhou	2013	WOS:000323893300019	Environmental Sciences	Aerosol and Air Quality Research	1680-8584	2.664	1	1	Chung Shan Medical University & Hospital	FM	Chung Shan Medical University & Hospital	1	Peoples R China	Asia	1	1	1	1
Prognostic factors for primary septicemia and wound infection caused by Vibrio vulnificus	2010	WOS:000277984800006	Emergency Medicine	American Journal of Emergency Medicine	0735-6757	1.994	0	1	Chung Shan Medical University & Hospital	Internal Med	Chung Shan Medical University & Hospital	0	0		1	1	1													1						1	1
Rapid Emergency Medicine Score as a main predictor of mortality in Vibrio vulnificus-related patients	2013	WOS:000321550400007	Emergency Medicine	American Journal of Emergency Medicine	0735-6757	1.152	0	1	Chung Shan Medical University & Hospital	Surgery	Chung Shan Medical University & Hospital	0	0		1	1	1																			1	1	1	1
Factors associated with treatment failure of percutaneous catheter drainage for pyogenic liver abscess in patients with hepatobiliary-pancreatic cancer	2013	WOS:000313622100009	Surgery	American Journal of Surgery	0002-9610	2.406	0	1	Chung Shan Medical University & Hospital	Surgery	China Med Univ Hosp	0	0		1	1		1												1						1			1
									Minist Hlth & Welf, Taichung Hospital
Simultaneous quantification of methylated purines in DNA by isotope dilution LC-MS/MS coupled with automated solid-phase extraction	2012	WOS:000298645900019	Biochemical Research Methods	Analytical and Bioanalytical Chemistry	1618-2642	3.659	1	0	Chung Shan Medical University & Hospital	FM	Chung Shan Medical University & Hospital	0	0		0	1	1	1
			Chemistry, Analytical
Exposure to environmental tobacco smoke, human E-cadherin C-160A polymorphism, and childhood asthma	2013	WOS:000324821300006	Allergy	Annals of Allergy Asthma & Immunology	1081-1206	2.746	0	1	Chung Shan Medical University & Hospital	Pediatric	Tungs Taichung Metroharbor Hosp	0	0		1	1	1
			Immunology
Effects of Metallothionein-1 Genetic Polymorphism and Cigarette Smoking on the Development of Hepatocellular Carcinoma	2013	WOS:000319169100047	Oncology	Annals of Surgical Oncology	1068-9265	3.943	1	0	Chung Shan Medical University & Hospital	FM	Chung Shan Medical University & Hospital	0	0		1	1	1																				1
			Surgery
NO removal by activated carbon-supported copper catalysts prepared by impregnation, polyol, and microwave heated polyol processes	2011	WOS:000290841300028	Chemistry, Physical	Applied Catalysis a-General	0926-860X	4.166	0	0	Chung Shan Medical University & Hospital	Environm Engn	Natl Chung Hsing Univ	0	0		1	1	1	1
			Environmental Sciences
Caregiver burden associated with behavioral and psychological symptoms of dementia (BPSD) in Taiwanese elderly	2012	WOS:000304247300012	Geriatrics & Gerontology	Archives of Gerontology and Geriatrics	0167-4943	1.704	0	0	Chung Shan Medical University & Hospital	Psychi	Changhua Christian Hosp	0	0		1	1					1		1				1
Leisure activity, mobility limitation and stress as modifiable risk factors for depressive symptoms in the elderly: Results of a national longitudinal study	2012	WOS:000301647400039	Geriatrics & Gerontology	Archives of Gerontology and Geriatrics	0167-4943	1.704	0	0	Chung Shan Medical University & Hospital	Psychi	Chung Shan Medical University & Hospital	0	0		0	1	1				1		1
Cigarette smoking and cognitive impairment: A 10-year cohort study in Taiwan	2010	WOS:000280580200007	Geriatrics & Gerontology	Archives of Gerontology and Geriatrics	0167-4943	1.438	0	1	Chung Shan Medical University & Hospital	Nursing	Chung Shan Medical University & Hospital	0	0		1	1	1
Evaluating outcomes of Taiwan's first gerontology certification program	2010	WOS:000273982300021	Geriatrics & Gerontology	Archives of Gerontology and Geriatrics	0167-4943	1.438	0	0	Chung Shan Medical University & Hospital	Nursing	Chung Shan Medical University & Hospital	1	USA	North America	1	1					1
Determinants of cognitive impairment over time among the elderly in Taiwan: results of the national longitudinal study	2010	WOS:000274865000013	Geriatrics & Gerontology	Archives of Gerontology and Geriatrics	0167-4943	1.438	1	0	Chung Shan Medical University & Hospital	FM	Chung Shan Medical University & Hospital	1	USA	North America	1	1	1				1		1
Elevated risk of hypertension induced by arsenic exposure in Taiwanese rural residents: possible effects of manganese superoxide dismutase (MnSOD) and 8-oxoguanine DNA glycosylase (OGG1) genes	2012	WOS:000304875000006	Toxicology	Archives of Toxicology	0340-5761	5.215	1	1	Chung Shan Medical University & Hospital	FM	Chung Shan Medical University & Hospital	0	0		0	1	1	1
Direct analysis of tobacco-specific nitrosamine NNK and its metabolite NNAL in human urine by LC-MS/MS: evidence of linkage to methylated DNA lesions	2014	WOS:000330959400011	Toxicology	Archives of Toxicology	0340-5761	5.078	1	0	Chung Shan Medical University & Hospital	FM	Chung Shan Medical University & Hospital	0	0		0	1	1	1
Perceived discrimination, family functioning, and depressive symptoms among immigrant women in Taiwan	2014	WOS:000342210000002	Psychiatry	Archives of Womens Mental Health	1434-1816	1.955	1	1	Chung Shan Medical University & Hospital	FM	Chung Shan Medical University & Hospital	0	0		1	1	1
Quantitative estimation of excess mortality for drivers and passengers exposed to particulate matters in long-distance buses	2012	WOS:000302508600028	Environmental Sciences	Atmospheric Environment	1352-2310	3.11	0	0	Chung Shan Medical University & Hospital	Bioenvironm Syst Engn	Natl Taiwan Univ	0	0		1	1	1
			Meteorology & Atmospheric Sciences
Multidrug Resistance 1 Gene Variants, Pesticide Exposure, and Increased Risk of DNA Damage	2014	WOS:000333964900001	Biotechnology & Applied Microbiology	Biomed Research International	2314-6133	2.706	1	1	Chung Shan Medical University & Hospital	FM	Chung Shan Medical University & Hospital	0	0		1	1	1	1
			Medicine, Research & Experimental
Effects of Water Extracts of Graptopetalum paraguayense on Blood Pressure, Fasting Glucose, and Lipid Profiles of Subjects with Metabolic Syndrome	2013	WOS:000327964400001	Biotechnology & Applied Microbiology	Biomed Research International	2314-6133	2.706	1	0	Chung Shan Medical University & Hospital	FM	Chung Shan Medical University & Hospital	0	0		0	1					1
			Medicine, Research & Experimental
Alleviation of metal and BTEX inhibition on BTEX degradation using PVA-immobilized degrader: kinetic model of BTEX degradation	2014	WOS:000335666100011	Biotechnology & Applied Microbiology	Bioprocess and Biosystems Engineering	1615-7591	1.823	0	1	Chung Shan Medical University & Hospital	Safety Hlth & Environm Engn	Natl Yunlin Univ Sci & Technol	0	0		1	1	1
			Engineering, Chemical
Phytoremediation of Cr(III) by Ipomonea aquatica (water spinach) from water in the presence of EDTA and chloride: Effects of Cr speciation	2010	WOS:000274972600018	Agricultural Engineering	Bioresource Technology	0960-8524	4.365	0	1	Chung Shan Medical University & Hospital	Soil & Water Conservat	Natl Chung Hsing Univ	0	0		1	1	1
			Biotechnology & Applied Microbiology
			Energy & Fuels
Novel oxygen-releasing immobilized cell beads for bioremediation of BTEX-contaminated water	2012	WOS:000311175000007	Agricultural Engineering	Bioresource Technology	0960-8524	4.75	0	1	Chung Shan Medical University & Hospital	Safety Hlth & Environm Engn	Natl Yunlin Univ Sci & Technol	0	0		1	1	1
			Biotechnology & Applied Microbiology
			Energy & Fuels
Comparative syntheses of tetracycline-imprinted polymeric silicate and acrylate on CdTe quantum dots as fluorescent sensors	2014	WOS:000339692500069	Biophysics	Biosensors & Bioelectronics	0956-5663	6.451	0	0	Chung Shan Medical University & Hospital	Occupat Med	Chung Shan Medical University & Hospital	0	0		1	1	1	1
			Biotechnology & Applied Microbiology
			Chemistry, Analytical
			Electrochemistry
			Nanoscience & Nanotechnology
The association between the apolipoprotein A1/high density lipoprotein -cholesterol and diabetes in Taiwan - a cross-sectional study	2013	WOS:000327445500001	Endocrinology & Metabolism	Bmc Endocrine Disorders	1472-6823	1.673	0	1	Chung Shan Medical University & Hospital	Publ Hlth	Chung Shan Medical University & Hospital	0	0		1	1	1
The association of anthropometry indices with gout in Taiwanese men	2013	WOS:000323229200001	Endocrinology & Metabolism	Bmc Endocrine Disorders	1472-6823	1.673	1	0	Chung Shan Medical University & Hospital	NA	Jen Ai Hosp	0	0		1	1	1
Influence of stressors and possible pathways of onset of seventh graders' suicidal ideation in urban and rural areas in Taiwan	2013	WOS:000329505200001	Public, Environmental & Occupational Health	Bmc Public Health	1471-2458	2.321	1	0	Chung Shan Medical University & Hospital	FM	Chung Shan Medical University & Hospital	0	0		1	1	1
Cell-type specificity of lung cancer associated with low-dose soil heavy metal contamination in Taiwan: An ecological study	2013	WOS:000318632000001	Public, Environmental & Occupational Health	Bmc Public Health	1471-2458	2.321	0	1	Chung Shan Medical University & Hospital	Publ Hlth	Chung Shan Medical University & Hospital	0	0		1	1	1																														1
Assessing trends and predictors of tuberculosis in Taiwan	2012	WOS:000300784100001	Public, Environmental & Occupational Health	Bmc Public Health	1471-2458	2.076	0	0	Chung Shan Medical University & Hospital	Bioenvironm Syst Engn	Natl Taiwan Univ	0	0		1	1	1
Geographic patterns of hepatocellular carcinoma mortality with exposure to iron in groundwater in Taiwanese population: An ecological study	2013	WOS:000318365800001	Public, Environmental & Occupational Health	Bmc Public Health	1471-2458	2.321	0	1	Chung Shan Medical University & Hospital	NA	Jen Ai Hosp	0	0		1	1	1			1
Cell type specificity of female lung cancer associated with sulfur dioxide from air pollutants in Taiwan: An ecological study	2012	WOS:000301522100001	Public, Environmental & Occupational Health	Bmc Public Health	1471-2458	2.076	0	1	Chung Shan Medical University & Hospital	Phys Educ	Fu Jen Catholic Univ	0	0		1	1	1
Vegan diet and blood lipid profiles: a cross-sectional study of pre and postmenopausal women	2014	WOS:000334948200001	Public, Environmental & Occupational Health	Bmc Womens Health	1472-6874	1.657	0	1	Chung Shan Medical University & Hospital	Psychi	Changhua Christian Hospital	0	0		1	1	1						1																							1
			Obstetrics & Gynecology
Effectiveness of the BDProbeTec ET system for detection of Mycobacterium tuberculosis complex in sputum and bronchoalveolar lavage specimens	2012	WOS:000305258200005	Infectious Diseases	Brazilian Journal of Infectious Diseases	1413-8670	1.036	0	0	Chung Shan Medical University & Hospital	NA	Potz Hosp	0	0		1	1								1				1		1
High-Throughput Simultaneous Analysis of Five Urinary Metabolites of Areca Nut and Tobacco Alkaloids by Isotope-Dilution Liquid Chromatography-Tandem Mass Spectrometry with On-Line Solid-Phase Extraction	2010	WOS:000282590500019	Oncology	Cancer Epidemiology Biomarkers & Prevention	1055-9965	3.919	1	0	Chung Shan Medical University & Hospital	FM	Chung Shan Medical University & Hospital	0	0		0	1	1	1
			Public, Environmental & Occupational Health
Improvement of textile dye removal by electrocoagulation with low-cost steel wool cathode reactor	2012	WOS:000306933400006	Engineering, Environmental	Chemical Engineering Journal	1385-8947	3.473	0	1	Chung Shan Medical University & Hospital	NA	Cent Taiwan Univ Sci & Technol	0	0		1	1	1
			Engineering, Chemical
Rapid regeneration of sulfanilic acid-sorbed activated carbon by microwave with persulfate	2012	WOS:000306933500042	Engineering, Environmental	Chemical Engineering Journal	1385-8947	3.473	0	1	Chung Shan Medical University & Hospital	NA	Cent Taiwan Univ Sci & Technol	0	0		1	1	1	1
			Engineering, Chemical
Increased concentrations of plasma growth arrest-specific 6 and its soluble tyrosine kinase receptor sAxl in Taiwanese women with pelvic inflammatory disease	2013	WOS:000328809000016	Medical Laboratory Technology	Clinica Chimica Acta	0009-8981	2.764	1	0	Chung Shan Medical University & Hospital	FM	Chung Shan Medical University & Hospital	0	0		1	1																														1
Correlation between concentrations of 8-oxo-7,8-dihydro-2 '-deoxyguanosine in urine, plasma and saliva measured by on-line solid-phase extraction LC-MS/MS	2010	WOS:000280033400009	Medical Laboratory Technology	Clinica Chimica Acta	0009-8981	2.389	1	1	Chung Shan Medical University & Hospital	FM	Chung Shan Medical University & Hospital	0	0		0	1	1	1
Significant elevation of plasma cathepsin B and cystatin C in patients with community-acquired pneumonia	2012	WOS:000305496000019	Medical Laboratory Technology	Clinica Chimica Acta	0009-8981	2.85	0	0	Chung Shan Medical University & Hospital	Infection	Chung Shan Medical University & Hospital	0	0		0	1												1		1
Clinical outcomes and prognostic factors for patients with Vibrio vulnificus infections requiring intensive care: A 10-yr retrospective study	2010	WOS:000282043800009	Critical Care Medicine	Critical Care Medicine	0090-3493	6.254	1	1	Chung Shan Medical University & Hospital	FM	Chung Shan Medical University & Hospital	0	0		1	1		1																		1		1	1
Polycyclic aromatic hydrocarbons in household dust near diesel transport routes	2012	WOS:000299058000007	Engineering, Environmental	Environmental Geochemistry and Health	0269-4042	2.076	1	1	Chung Shan Medical University & Hospital	FM	Chung Shan Medical University & Hospital	0	0		0	1	1
			Environmental Sciences
			Public, Environmental & Occupational Health
			Water Resources
Probabilistic framework for assessing the arsenic exposure risk from cooked fish consumption	2014	WOS:000344546700008	Engineering, Environmental	Environmental Geochemistry and Health	0269-4042	2.573	0	0	Chung Shan Medical University & Hospital	0	Dept Hlth Risk Management	0	0		1	1	1	1
			Environmental Sciences
			Public, Environmental & Occupational Health
			Water Resources
Comparison of polycyclic aromatic hydrocarbon emissions on gasoline- and diesel-dominated routes	2013	WOS:000319753600031	Environmental Sciences	Environmental Monitoring and Assessment	0167-6369	1.679	1	1	Chung Shan Medical University & Hospital	FM	Chung Shan Medical University & Hospital	0	0		0	1	1
Aerosol characteristics of different types of episode	2013	WOS:000326397900010	Environmental Sciences	Environmental Monitoring and Assessment	0167-6369	1.679	1	1	Chung Shan Medical University & Hospital	FM	Chung Shan Medical University & Hospital	0	0		1	1	1	1
Evaluation of acute toxicity and teratogenic effects of disinfectants by Daphnia magna embryo assay	2012	WOS:000306034900008	Environmental Sciences	Environmental Pollution	0269-7491	3.73	0	1	Chung Shan Medical University & Hospital	Dept Environm Engn & Sci	Chung Shan Medical University & Hospital	0	0		1	1	1	1
Concentration and composition variations of metals in the outdoor PM10 of elementary schools during river dust episodes	2014	WOS:000343918400028	Environmental Sciences	Environmental Science and Pollution Research	0944-1344	2.757	1	1	Chung Shan Medical University & Hospital	FM	Chung Shan Medical University & Hospital	0	0		0	1	1
Copper emission during thermal treatment of simulated copper sludge	2012	WOS:000301927400003	Environmental Sciences	Environmental Technology	0959-3330	1.606	0	1	Chung Shan Medical University & Hospital	FM	Natl Chung Hsing Univ	0	0		1	1	1	1
Cost-effectiveness of influenza control measures: a dynamic transmission model-based analysis	2013	WOS:000330370300014	Public, Environmental & Occupational Health	Epidemiology and Infection	0950-2688	2.491	1	1	Chung Shan Medical University & Hospital	FM	Chung Shan Medical University & Hospital	0	0		1	1	1	1
			Infectious Diseases
Using experimental human influenza infections to validate a viral dynamic model and the implications for prediction	2012	WOS:000307283700004	Public, Environmental & Occupational Health	Epidemiology and Infection	0950-2688	2.867	1	0	Chung Shan Medical University & Hospital	FM	Chung Shan Medical University & Hospital	0	0		1	1	1	1
			Infectious Diseases
Understanding influenza virus-specific epidemiological properties by analysis of experimental human infections	2010	WOS:000278177800004	Public, Environmental & Occupational Health	Epidemiology and Infection	0950-2688	2.257	0	0	Chung Shan Medical University & Hospital	Dept Bioenvironm Syst Engn	National Taiwan University & Hospital	0	0		1	1	1	1
			Infectious Diseases
Factors associated with intensiveness of use of child preventive health services in Taiwan: a comparative study between cross-cultural immigrant families and native-born families	2013	WOS:000316717800001	Ethnic Studies	Ethnicity & Health	1355-7858	1.276	0	1	Chung Shan Medical University & Hospital	Nursing	Changhua Christian Hospital	0	0		1	1	1
			Public, Environmental & Occupational Health
			Medical Ethics
Indigofera suffruticosa Mill extracts up-regulate the expression of the pi class of glutathione S-transferase and NAD(P)H: quinone oxidoreductase 1 in rat Clone 9 liver cells	2013	WOS:000324280000076	Food Science & Technology	Food and Chemical Toxicology	0278-6915	2.61	1	0	Chung Shan Medical University & Hospital	FM	Chung Shan Medical University & Hospital	0	0		1	1		1									1
			Toxicology
Urinary analysis of 8-oxo-7,8-dihydroguanine and 8-oxo-7,8-dihydro-2 '-deoxyguanosine by isotope-dilution LC-MS/MS with automated solid-phase extraction: Study of 8-oxo-7,8-dihydroguanine stability	2010	WOS:000274038900010	Biochemistry & Molecular Biology	Free Radical Biology and Medicine	0891-5849	5.707	1	1	Chung Shan Medical University & Hospital	FM	Chung Shan Medical University & Hospital	0	0		0	1	1	1
			Endocrinology & Metabolism
Clinical implications of aldo-keto reductase family 1 member C3 and its relationship with lipocalin 2 in cancer of the uterine cervix	2014	WOS:000332191700039	Oncology	Gynecologic Oncology	0090-8258	3.607	0	0	Chung Shan Medical University & Hospital	GYN	Chung Shan Medical University & Hospital	0	0		1	1																														1
			Obstetrics & Gynecology
Decline in the incidence of healthcare-associated methicillin-resistant Staphylococcus aureus (HA-MRSA) correlates with deceased antimicrobial consumption at a tertiary care hospital in Taiwan, 2001-2009	2010	WOS:000284149300006	Infectious Diseases	International Journal of Antimicrobial Agents	0924-8579	3.787	0	1	Chung Shan Medical University & Hospital	Infection	Chung Shan Medical University & Hospital	0	0		1	1														1						1
			Microbiology
			Pharmacology & Pharmacy
Mortality of colorectal cancer in Taiwan, 1971-2010: temporal changes and age-period-cohort analysis	2012	WOS:000312343700015	Gastroenterology & Hepatology	International Journal of Colorectal Disease	0179-1958	2.238	0	1	Chung Shan Medical University & Hospital	Public Health	Chung Shan Medical University & Hospital	0	0		1	1	1
			Surgery
Probabilistic Risk Assessment of Consumer Exposure to Particle-Bound PAHs at a Taiwanese Night Market	2014	WOS:000339932500015	Environmental Sciences	International Journal of Environmental Research	1735-6865	0	1	1	Chung Shan Medical University & Hospital	FM	Chung Shan Medical University & Hospital	0	0		0	1	1
Effects of mediator producer and dissolved oxygen on electricity generation in a baffled stacking microbial fuel cell treating high strength molasses wastewater	2014	WOS:000339457600041	Chemistry, Physical	International Journal of Hydrogen Energy	0360-3199	2.93	1	0	Chung Shan Medical University & Hospital	FM	Chung Shan Medical University & Hospital	0	0		1	1	1	1
			Electrochemistry
			Energy & Fuels
Quantitative determination of urinary N3-methyladenine by isotope-dilution LC-MS/MS with automated solid-phase extraction	2011	WOS:000293108100002	Physics, Atomic, Molecular & Chemical	International Journal of Mass Spectrometry	1387-3806	2.549	1	0	Chung Shan Medical University & Hospital	FM	Chung Shan Medical University & Hospital	0	0		0	1	1	1
			Spectroscopy
ATPase family AAA domain containing 3A is an anti-apoptotic factor and a secretion regulator of PSA in prostate cancer	2011	WOS:000291505400002	Medicine, Research & Experimental	International Journal of Molecular Medicine	1107-3756	1.573	0	0	Chung Shan Medical University & Hospital	GU	Chung Shan Medical University & Hospital	0	0		1	1																											1
Evaluating a community-based stroke nursing education and rehabilitation programme for patients with mild stroke	2013	WOS:000319884200003	Nursing	International Journal of Nursing Practice	1322-7114	0.543	1	1	Chung Shan Medical University & Hospital	FM	Chung Shan Medical University & Hospital	0	0		1	1	1										1
Child growth from birth to 18 months old born after assisted reproductive technology-Results of a national birth cohort study	2010	WOS:000281383500012	Nursing	International Journal of Nursing Studies	0020-7489	2.103	0	0	Chung Shan Medical University & Hospital	Nursing	Chung Shan Medical University & Hospital	0	0		1	1	1		1
Contact investigation for tuberculosis in Taiwan contacts aged under 20 years in 2005	2011	WOS:000286488700010	Infectious Diseases	International Journal of Tuberculosis and Lung Disease	1027-3719	2.731	0	0	Chung Shan Medical University & Hospital	Public Health	Chung Shan Medical University & Hospital	0	0		1	1	1
			Respiratory System
Trajectory of depression symptoms and related factors in later life - A population based study	2011	WOS:000295112000018	Clinical Neurology	Journal of Affective Disorders	0165-0327	3.517	0	1	Chung Shan Medical University & Hospital	Public Health	Chung Shan Medical University & Hospital	0	0		1	1	1	1	1
			Psychiatry
Mulberry Water Extracts Inhibit Atherosclerosis through Suppression of the Integrin-beta(3)/Focal Adhesion Kinase Complex and Downregulation of Nuclear Factor kappa B Signaling in Vivo and in Vitro	2014	WOS:000342609500011	Agriculture, Multidisciplinary	Journal of Agricultural and Food Chemistry	0021-8561	3.107	0	0	Chung Shan Medical University & Hospital	Internal Medicine	Chung Shan Medical University & Hospital	0	0		0	1																				1
			Chemistry, Applied
			Food Science & Technology
Effect of T'ai Chi Exercise on Biochemical Profiles and Oxidative Stress Indicators in Obese Patients with Type 2 Diabetes	2010	WOS:000283932100005	Integrative & Complementary Medicine	Journal of Alternative and Complementary Medicine	1075-5535	1.498	0	1	Chung Shan Medical University & Hospital	Meta	Chung Shan Medical University & Hospital	0	0		0	1																	1			1
Time-series analysis of the relationship of antimicrobiial use and hand hygiene promotion with the incidence of healthcare-associated infections	2012	WOS:000305865200006	Biotechnology & Applied Microbiology	Journal of Antibiotics	0021-8820	2.191	0	0	Chung Shan Medical University & Hospital	Infection	Chung Shan Medical University & Hospital	0	0		1	1														1						1
			Immunology
			Microbiology
			Pharmacology & Pharmacy
Sex Disparities in the Association of Lung Adenocarcinoma with Colorectal Cancer	2013	WOS:000327586400001	Oncology	Journal of Cancer	1837-9664	2.639	0	1	Chung Shan Medical University & Hospital	Public Health	Chung Shan Medical University & Hospital	0	0		1	1	1
Significant Association of Elevated Concentration of Plasma YKL-40 with Disease Severity in Patients With Pelvic Inflammatory Disease	2012	WOS:000304397200003	Medical Laboratory Technology	Journal of Clinical Laboratory Analysis	0887-8013	1.356	0	0	Chung Shan Medical University & Hospital	Nursing	Chung Shan Medical University & Hospital	0	0		0	1																														1
Characteristics of major secondary ions in typical polluted atmospheric aerosols during autumn in central Taiwan	2011	WOS:000289137000010	Environmental Sciences	Journal of Environmental Management	0301-4797	3.245	0	1	Chung Shan Medical University & Hospital	NA	Hungkuang Univ	0	0		1	1	1	1
Treatment and toxicity evaluation of methylene blue using electrochemical oxidation, fly ash adsorption and combined electrochemical oxidation-fly ash adsorption	2010	WOS:000279062800018	Environmental Sciences	Journal of Environmental Management	0301-4797	2.597	1	1	Chung Shan Medical University & Hospital	FM	Chung Shan Medical University & Hospital	0	0		1	1	1
Use of Seasonal Influenza Virus Titer and Respiratory Symptom Score to Estimate Effective Human Contact Rates	2012	WOS:000306632100011	Public, Environmental & Occupational Health	Journal of Epidemiology	0917-5040	2.113	1	0	Chung Shan Medical University & Hospital	FM	Chung Shan Medical University & Hospital	0	0		1	1	1	1
Linking Contact Behavior and Droplet Patterns to Dynamically Model Indoor Respiratory Infections Among Schoolchildren	2013	WOS:000321991600003	Public, Environmental & Occupational Health	Journal of Epidemiology	0917-5040	2.862	0	1	Chung Shan Medical University & Hospital	Dept Bioenvironm Sys Engn	Chung Shan Medical University & Hospital	0	0		0	1	1	1
Evaluation of the vehicle contributions of metals to indoor environments	2012	WOS:000307934000009	Environmental Sciences	Journal of Exposure Science and Environmental Epidemiology	1559-0631	3.187	1	1	Chung Shan Medical University & Hospital	FM	Chung Shan Medical University & Hospital	0	0		1	1	1
			Public, Environmental & Occupational Health
			Toxicology
Clinical Outcomes and Prognostic Factors of Cancer Patients with Pyogenic Liver Abscess	2011	WOS:000296520000017	Gastroenterology & Hepatology	Journal of Gastrointestinal Surgery	1091-255X	2.826	1	1	Chung Shan Medical University & Hospital	FM	Chung Shan Medical University & Hospital	0	0		1	1														1									1
			Surgery
Co-occurrence of Anemia, Marginal Vitamin B-6, and Folate Status and Depressive Symptoms in Older Adults	2012	WOS:000310627400006	Geriatrics & Gerontology	Journal of Geriatric Psychiatry and Neurology	0891-9887	3.525	0	0	Chung Shan Medical University & Hospital	Public Health	National Taiwan University & Hospital	0	0		1	1	1			1
			Clinical Neurology
			Psychiatry
Effect of Cu species on leaching behavior of simulated copper sludge after thermal treatment: ESCA analysis	2010	WOS:000278626700147	Engineering, Environmental	Journal of Hazardous Materials	0304-3894	3.723	0	1	Chung Shan Medical University & Hospital	Dept Environm Engn	Natl Chung Hsing Univ	0	0		1	1	1	1
			Engineering, Civil
			Environmental Sciences
Lung cancer risk in relation to traffic-related nano/ultrafine particle-bound PAHs exposure: A preliminary probabilistic assessment	2011	WOS:000292427800020	Engineering, Environmental	Journal of Hazardous Materials	0304-3894	4.173	0	0	Chung Shan Medical University & Hospital	Dept Bioenvironm Syst Engn	National Taiwan University & Hospital	0	0		1	1	1	1		1
			Engineering, Civil
			Environmental Sciences
Effects of dissolved oxygen on dye removal by zero-valent iron	2010	WOS:000282240800116	Engineering, Environmental	Journal of Hazardous Materials	0304-3894	3.723	1	1	Chung Shan Medical University & Hospital	FM	Chung Shan Medical University & Hospital	0	0		1	1	1	1
			Engineering, Civil
			Environmental Sciences
Evaluation of acute toxicity and teratogenic effects of plant growth regulators by Daphnia magna embryo assay	2011	WOS:000292427800067	Engineering, Environmental	Journal of Hazardous Materials	0304-3894	4.173	1	1	Chung Shan Medical University & Hospital	FM	Chung Shan Medical University & Hospital	0	0		0	1	1
			Engineering, Civil
			Environmental Sciences
Effects of UV irradiation on humic acid removal by ozonation, Fenton and Fe-0/air treatment: THMFP and biotoxicity evaluation	2011	WOS:000300204500039	Engineering, Environmental	Journal of Hazardous Materials	0304-3894	4.173	0	1	Chung Shan Medical University & Hospital	Dept Food Sci	Chung Shan Medical University & Hospital	0	0		1	1	1	1
			Engineering, Civil
			Environmental Sciences
Comparison of Renal Function and Other Health Outcomes in Vegetarians versus Omnivores in Taiwan	2010	WOS:000282600800007	Environmental Sciences	Journal of Health Population and Nutrition	1606-0997	1.109	0	1	Chung Shan Medical University & Hospital	Nephrology	Chung Shan Medical University & Hospital	0	0		1	1					1								1
			Public, Environmental & Occupational Health
Retrospective Evaluation of Infective Endocarditis over Ten Years in Taiwan	2013	WOS:000321721900016	Cardiac & Cardiovascular Systems	Journal of Heart Valve Disease	0966-8519	0.733	0	0	Chung Shan Medical University & Hospital	Dept Hlth	Taichung Hosp	0	0		1	1								1						1
Probabilistic indoor transmission modeling for influenza (sub)type viruses	2010	WOS:000273715600003	Infectious Diseases	Journal of Infection	0163-4453	3.805	1	0	Chung Shan Medical University & Hospital	FM	Chung Shan Medical University & Hospital	0	0		1	1	1	1
Impact of infectious etiology on the outcome of Taiwanese patients hospitalized with community acquired pneumonia	2013	WOS:000315117600007	Infectious Diseases	Journal of Infection in Developing Countries	1972-2680	1.267	0	0	Chung Shan Medical University & Hospital	Infection	Chung Shan Medical University & Hospital	0	0		0	1								1				1		1
Seroepidemiology of Hepatitis A Virus Infection Among Schoolchildren in Taiwan	2011	WOS:000285678500002	Virology	Journal of Medical Virology	0146-6615	2.82	0	0	Chung Shan Medical University & Hospital	Internal Medicine	Chung Shan Medical University & Hospital	0	0		0	1																		1		1
Higher Expression of Whole Blood MicroRNA-21 in Patients with Ankylosing Spondylitis Associated with Programmed Cell Death 4 mRNA Expression and Collagen Cross-linked C-telopeptide Concentration	2014	WOS:000337106600010	Rheumatology	Journal of Rheumatology	0315-162X	3.173	0	1	Chung Shan Medical University & Hospital	AIR	Chung Shan Medical University & Hospital	0	0		1	1	1									1
Semi-Quantitative Expression of Tissue Inhibitor of Matrix Metalloproteinase-2 in Cancer of Uterine Cervix	2011	WOS:000293458500016	Oncology	Journal of Surgical Oncology	0022-4790	2.1	0	0	Chung Shan Medical University & Hospital	GS	Changhua Christian Hosp	0	0		1	1																							1							1
			Surgery
Analysis of the major factors affecting the visibility degradation in two stations	2013	WOS:000318148200005	Engineering, Environmental	Journal of the Air & Waste Management Association	1096-2247	1.171	1	1	Chung Shan Medical University & Hospital	FM	Chung Shan Medical University & Hospital	0	0		1	1		1		1
			Environmental Sciences
			Meteorology & Atmospheric Sciences
Vitamin B-12 Status Is Not Associated with Plasma Homocysteine in Parents and Their Preschool Children: Lacto-Ovo, Lacto, and Ovo Vegetarians and Omnivores	2010	WOS:000279997700002	Nutrition & Dietetics	Journal of the American College of Nutrition	0731-5724	1.95	0	0	Chung Shan Medical University & Hospital	Dept Early Childhood Dev & Educ	Chaoyang Univ Technol	0	0		1	1
Healthy Behaviors and Onset of Functional Disability in Older Adults: Results of a National Longitudinal Study	2011	WOS:000287240700002	Geriatrics & Gerontology	Journal of the American Geriatrics Society	0002-8614	3.737	0	1	Chung Shan Medical University & Hospital	Nursing	Chung Shan Medical University & Hospital	0	0		0	1	1				1
			Gerontology
Quantitative Evaluation of Trace Elements in Sediments of the Tamsui River via Instrumental Neutron Activation Analysis	2011	WOS:000295247500020	Chemistry, Multidisciplinary	Journal of the Chinese Chemical Society	0009-4536	0.678	0	0	Chung Shan Medical University & Hospital	Inst Med	Chung Shan Medical University & Hospital	0	0		1	1																		1		1
Lung Cancer and Prognosis in Taiwan: A Population-Based Cancer Registry	2013	WOS:000323429100008	Oncology	Journal of Thoracic Oncology	1556-0864	5.8	0	0	Chung Shan Medical University & Hospital	CS	Changhua Christian Hosp	0	0		1	1	1																									1
			Respiratory System
The Laboratory Risk Indicator for Necrotizing Fasciitis score for discernment of necrotizing fasciitis originated from Vibrio vulnificus infections	2012	WOS:000312620400034	Critical Care Medicine	Journal of Trauma and Acute Care Surgery	2163-0755	0	0	1	Chung Shan Medical University & Hospital	Surgery	Chung Shan Medical University & Hospital	0	0		1	1		1																		1		1	1
			Surgery
Minimum amount of physical activity for reduced mortality and extended life expectancy: a prospective cohort study	2011	WOS:000295723600026	Medicine, General & Internal	Lancet	0140-6736	38.278	0	0	Chung Shan Medical University & Hospital	NA	China Med Univ Hosp	1	USA	North America	1	1	1			1
The Coexistence of Common Pulmonary Diseases on the Histologic Type of Lung Cancer in Both Genders in Taiwan A STROBE-Compliant Article	2014	WOS:000346406500002	Medicine, General & Internal	Medicine	0025-7974	4.867	0	1	Chung Shan Medical University & Hospital	Public Health	Chung Shan Medical University & Hospital	0	0		1	1	1
Fluorescent turn-on detection of cysteine using a molecularly imprinted polyacrylate linked to allylthiol-capped CdTe quantum dots	2014	WOS:000338317000027	Chemistry, Analytical	Microchimica Acta	0026-3672	3.719	0	0	Chung Shan Medical University & Hospital	Dept Occupat Med	Chung Shan Medical University & Hospital	0	0		0	1	1	1
Distribution and phenotypic expression of mineralocorticoid receptor and CYP11B2 T-344C polymorphisms in a Taiwanese hypertensive population	2013	WOS:000317075300027	Biochemistry & Molecular Biology	Molecular Biology Reports	0301-4851	1.958	0	0	Chung Shan Medical University & Hospital	Internal Medicine	Chung Shan Medical University & Hospital	0	0		0	1																				1
Rhabdomyolysis following pandemic influenza A (H1N1) infection	2010	WOS:000281338100006	Medicine, General & Internal	Netherlands Journal of Medicine	0300-2977	1.842	1	1	Chung Shan Medical University & Hospital	FM	Chung Shan Medical University & Hospital	0	0		0	1													1	1
Beneficial effects of fructo-oligosaccharides supplementation on fecal bifidobacteria and index of peroxidation status in constipated nursing-home residents-A placebo-controlled, diet-controlled trial	2011	WOS:000287684700010	Nutrition & Dietetics	Nutrition	0899-9007	3.025	1	0	Chung Shan Medical University & Hospital	FM	Chung Shan Medical University & Hospital	0	0		0	1					1
Long-term supplementation of isomalto-oligosaccharides improved colonic microflora profile, bowel function, and blood cholesterol levels in constipated elderly people-A placebo-controlled, diet-controlled trial	2011	WOS:000288412400014	Nutrition & Dietetics	Nutrition	0899-9007	3.025	1	0	Chung Shan Medical University & Hospital	FM	Chung Shan Medical University & Hospital	0	0		0	1					1
Effects of coenzyme Q10 supplementation (300 mg/day) on antioxidation and anti-inflammation in coronary artery disease patients during statins therapy: a randomized, placebo-controlled trial	2013	WOS:000329394000001	Nutrition & Dietetics	Nutrition Journal	1475-2891	2.635	0	0	Chung Shan Medical University & Hospital	Intens Care Unit	Taichung Veterans General Hospital	0	0		1	1					1																	1
Waist-to-hip ratio is a better anthropometric index than body mass index for predicting the risk of type 2 diabetes in Taiwanese population	2010	WOS:000283334800001	Nutrition & Dietetics	Nutrition Research	0271-5317	2.092	0	1	Chung Shan Medical University & Hospital	NA	Taichung Veterans General Hospital	0	0		1	1	1
Optimal cutoff value of high-density lipoprotein cholesterol for predicting coronary artery disease in Taiwanese population	2010	WOS:000274370800003	Nutrition & Dietetics	Nutrition Research	0271-5317	2.092	0	1	Chung Shan Medical University & Hospital	Nutrition	Chung Shan Medical University & Hospital	0	0		1	1	1																					1
A significant correlation between the plasma levels of coenzyme Q10 and vitamin B-6 and a reduced risk of coronary artery disease	2012	WOS:000311654400003	Nutrition & Dietetics	Nutrition Research	0271-5317	2.142	0	0	Chung Shan Medical University & Hospital	Intens Care Unit	Taichung Veterans General Hospital	0	0		1	1					1																	1
Exposure to general anesthesia in early life and the risk of attention deficit/hyperactivity disorder development: a nationwide, retrospective matched-cohort study	2014	WOS:000337615400014	Anesthesiology	Pediatric Anesthesia	1155-5645	1.742	0	0	Chung Shan Medical University & Hospital	Anesthesiol	Chung Shan Medical University & Hospital	0	0		0	1	1																													1			1
			Pediatrics
Birth outcomes and risk factors in adolescent pregnancies: Results of a Taiwanese national survey	2010	WOS:000278803000036	Pediatrics	Pediatrics International	1328-8067	0.755	0	1	Chung Shan Medical University & Hospital	Nursing	Chung Shan Medical University & Hospital	0	0		1	1
Urinary Excretion of Oxidative Damage Markers in a Rat Model of Vascularized Composite Allotransplantation	2013	WOS:000329796500006	Surgery	Plastic and Reconstructive Surgery	0032-1052	3.328	0	0	Chung Shan Medical University & Hospital	PS	Chang Gung Memorial Hospital	0	0		1	1																								1
Relationships between Inflammation, Adiponectin, and Oxidative Stress in Metabolic Syndrome	2012	WOS:000309388400121	Multidisciplinary Sciences	Plos One	1932-6203	3.73	0	0	Chung Shan Medical University & Hospital	Dept Hlth Food	Chung Chou Univ Sci & Technol	0	0		1	1					1																	1
The impact of number of drugs prescribed on the risk of potentially inappropriate medication among outpatient older adults with chronic diseases	2013	WOS:000326744000006	Medicine, General & Internal	Qjm-an International Journal of Medicine	1460-2725	2.461	1	1	Chung Shan Medical University & Hospital	FM	Chung Shan Medical University & Hospital	0	0		0	1					1															1
Polymorphisms of Human Nonmetastatic Clone 23 Type 1 Gene and Neoplastic Lesions of Uterine Cervix	2010	WOS:000282003100002	Obstetrics & Gynecology	Reproductive Sciences	1933-7191	2.586	0	0	Chung Shan Medical University & Hospital	Surgery	Da Chien Gen Hosp	0	0		1	1																							1							1
			Reproductive Biology
Single-Nucleotide Polymorphisms and Haplotypes of Membrane Type 1-Matrix Metalloproteinase in Susceptibility and Clinical Significance of Squamous Cell Neoplasia of Uterine Cervix in Taiwan Women	2012	WOS:000307540200004	Obstetrics & Gynecology	Reproductive Sciences	1933-7191	2.064	0	0	Chung Shan Medical University & Hospital	GYN	Chung Shan Medical University & Hospital	0	0		0	1																														1
			Reproductive Biology
Significant Relation of Tissue Inhibitor of Matrix Metalloproteinase-2 and Its Combination With Matrix Metalloproteinase-2 to Survival of Patients With Cancer of Uterine Cervix	2011	WOS:000293187300012	Obstetrics & Gynecology	Reproductive Sciences	1933-7191	2.444	0	0	Chung Shan Medical University & Hospital	GYN	Chung Shan Medical University & Hospital	0	0		0	1																														1
			Reproductive Biology
Relationships of Single Nucleotide Polymorphisms of Monocyte Chemoattractant Protein 1 and Chemokine Receptor 2 With Susceptibility and Clinicopathologic Characteristics of Neoplasia of Uterine Cervix in Taiwan Women	2013	WOS:000324040200007	Obstetrics & Gynecology	Reproductive Sciences	1933-7191	2.179	0	0	Chung Shan Medical University & Hospital	GYN	Changhua Christian Hosp	0	0		1	1																														1
			Reproductive Biology
Associations of the PTPN22 and CTLA-4 genetic polymorphisms with Taiwanese ankylosing spondylitis	2014	WOS:000335160000014	Rheumatology	Rheumatology International	0172-8172	1.627	0	1	Chung Shan Medical University & Hospital	NA	Chung Shan Medical University & Hospital	0	0		1	1	1	1								1
A Probabilistic Transmission Model to Assess Infection Risk from Mycobacterium Tuberculosis in Commercial Passenger Trains	2011	WOS:000292109900009	Public, Environmental & Occupational Health	Risk Analysis	0272-4332	2.366	1	0	Chung Shan Medical University & Hospital	FM	Chung Shan Medical University & Hospital	0	0		1	1	1	1
			Mathematics, Interdisciplinary Applications
			Social Sciences, Mathematical Methods
A Probabilistic Transmission and Population Dynamic Model to Assess Tuberculosis Infection Risk	2012	WOS:000307385700013	Public, Environmental & Occupational Health	Risk Analysis	0272-4332	2.278	0	0	Chung Shan Medical University & Hospital	Dept Bioenvironm Syst Engn	National Taiwan University & Hospital	0	0		1	1	1	1		1
			Mathematics, Interdisciplinary Applications
			Social Sciences, Mathematical Methods
Quantitative Links Between Arsenic Exposure and Influenza A (H1N1) Infection-Associated Lung Function Exacerbations Risk	2011	WOS:000293906500010	Public, Environmental & Occupational Health	Risk Analysis	0272-4332	2.366	0	0	Chung Shan Medical University & Hospital	Dept Bioenvironm Syst Engn	National Taiwan University & Hospital	0	0		1	1	1	1
			Mathematics, Interdisciplinary Applications
			Social Sciences, Mathematical Methods
Assessing the Exacerbations Risk of Influenza-Associated Chronic Occupational Asthma	2010	WOS:000279939700009	Public, Environmental & Occupational Health	Risk Analysis	0272-4332	2.096	0	0	Chung Shan Medical University & Hospital	Dept Bioenvironm Syst Engn	National Taiwan University & Hospital	0	0		1	1	1	1
			Mathematics, Interdisciplinary Applications
			Social Sciences, Mathematical Methods
Grief responses and coping strategies among infertile women after failed in vitro fertilization treatment	2010	WOS:000281000800011	Nursing	Scandinavian Journal of Caring Sciences	0283-9318	1.042	1	0	Chung Shan Medical University & Hospital	FM	Chung Shan Medical University & Hospital	0	0		0	1
Modeling the transmission dynamics of dengue fever: Implications of temperature effects	2012	WOS:000306887900046	Environmental Sciences	Science of the Total Environment	0048-9697	3.258	1	1	Chung Shan Medical University & Hospital	FM	Chung Shan Medical University & Hospital	0	0		0	1	1
Lagged temperature effect with mosquito transmission potential explains dengue variability in southern Taiwan: Insights from a statistical analysis	2010	WOS:000280917300013	Environmental Sciences	Science of the Total Environment	0048-9697	3.19	1	0	Chung Shan Medical University & Hospital	FM	Chung Shan Medical University & Hospital	0	0		1	1	1
The real-time method of assessing the contribution of individual sources on visibility degradation in Taichung	2014	WOS:000343613100024	Environmental Sciences	Science of the Total Environment	0048-9697	3.163	0	1	Chung Shan Medical University & Hospital	Environm Changes	Acad Sinica	0	0		1	1	1	1
Cell type specificity of lung cancer associated with nitric oxide	2010	WOS:000282348100002	Environmental Sciences	Science of the Total Environment	0048-9697	3.19	1	1	Chung Shan Medical University & Hospital	FM	Chung Shan Medical University & Hospital	1	USA	North America	1	1	1
The Antioxidant Status and Concentrations of Coenzyme Q10 and Vitamin E in Metabolic Syndrome	2013	WOS:000324420700001	Multidisciplinary Sciences	Scientific World Journal	1537-744X	1.219	1	0	Chung Shan Medical University & Hospital	FM	Chung Shan Medical University & Hospital	0	0		1	1					1																	1
Sleep-disordered breathing, behavior, and academic performance in Taiwan schoolchildren	2011	WOS:000290807600013	Clinical Neurology	Sleep and Breathing	1520-9512	1.839	0	1	Chung Shan Medical University & Hospital	Rehabilitation	Chung Shan Medical University & Hospital	0	0		1	1	1			1
			Respiratory System
Correlation of plasma osteopontin and neutrophil gelatinase-associated lipocalin levels with the severity and clinical outcome of pelvic inflammatory disease	2014	WOS:000339698400005	Obstetrics & Gynecology	Taiwanese Journal of Obstetrics & Gynecology	1028-4559	1.261	0	0	Chung Shan Medical University & Hospital	GYN	Chung Shan Medical University & Hospital	0	0		0	1																														1
The Effects of Perceived Stress and Life Style Leading to Breast Cancer	2013	WOS:000315156300002	Public, Environmental & Occupational Health	Women & Health	0363-0242	1.194	1	1	Chung Shan Medical University & Hospital	FM	Chung Shan Medical University & Hospital	0	0		0	1	1	1																	1				1
			Women's Studies
Predictors of Mortality in Skin and Soft-tissue Infections Caused by Vibrio vulnificus	2010	WOS:000279103400039	Surgery	World Journal of Surgery	0364-2313	2.693	0	1	Chung Shan Medical University & Hospital	Geriatric	Yuan Lin Kuo Hosp	0	0		1	1	1				1															1			1
Long-Term Outcomes of Patients Treated with Primary Stenting for Transplant Renal Artery Stenosis: A 10-year Case Cohort Study	2012	WOS:000298328600032	Surgery	World Journal of Surgery	0364-2313	2.228	0	0	Chung Shan Medical University & Hospital	Internal Med	Chung Shan Medical University & Hospital	0	0		0	1																			1	1
[truncated: 39 more columns]

## Sheet: 工作表1
	2010	2011	2012	2013	2014		Paper counts
Publ Hlth	67	73	98	134	121		493
Internal Med	24	28	38	55	54		199
Hosp& Hlth care	21	38	35	41	45		180
Environm & Occupat Hlth	30	31	29	25	27		142
Nursing	26	21	27	33	22		129
Bioinformation	18	25	21	26	29		119
Geriatric	31	22	20	25	20		118
藥學	13	13	21	22	31		100
Psychiat	11	13	14	24	33		95
CV	11	13	16	30	17		87
Nephro	18	9	12	22	19		80
病理	14	11	20	15	17		77
META	12	7	16	20	19		74
中醫	10	14	13	15	19		71
Surgery	14	11	11	19	16		71
HEMA	3	3	9	32	22		69
Emergency	7	13	10	21	15		66
Neuro	4	16	9	20	14		63
GI	9	12	10	16	14		61
兒科	15	9	12	11	13		60
Radio	10	11	9	17	10		57
Infection	7	6	12	18	10		53
Biology	14	5	7	10	17		53
Nutrition	11	6	14	10	10		51
Biotechnology	15	16	14	2			47
GU	7	13	9	9	4		42
GYN	4	7	5	11	15		42
復健	6	5	8	7	14		40
Chest	3	5	6	10	11		35
Gene/Molecular Research	6	8	5	6	8		33
Critical care	7	1	9	12	3		32
Cancer	3	5	7	8	7		30
牙	3	1	4	12	10		30
AIR	3	5	5	5	10		28
Health policy	11	8	5	2			26
皮膚	3	6	6	6	2		23
Ortho	1	3	2	9	8		23
生理	1	2	8	6	3		20
Basic Med Sci	4	6	1	2	6		19
NS		8	1	2	5		16
Mech Engn	4	1	4	3	3		15
Finance	2	2	2	4	4		14
化學		3	3	4	4		14
核醫	1	2	1	3	7		14
Radio Onco	3	3	2	1	4		13
ENT		3	2	6	2		13
麻醉	1	1	3	3	4		12
眼科		1	3	4	3		11
Hlth Exam				4	6		10
Exercise		1	2	2	4		9
Computer Science	3		2	1	3		9
Toxicity	2	1	2		4		9
生化		1	2	2	4		9
Chest surgery	3	2		3			8
Palliative care	1	4	1		1		7
Humanities/social	1	3	2		1		7
CDC	1		1	2	2		7
數學		3	1		1		6
解剖	2		3				5
PS		1	3	1			5
CVS				2	2		5
細胞及系統醫學研究所		1		1	2		4
CRS			2	1			4
Home care	2		1				3
Bioenvironm Syst Engn				1	1		3
Social work	1		1				2
Business	1		1				2
education			1		1		2
美容系				1	1		2
Transfus Med	1				1		2
Telecommun					2		2
兒童外			1				2
Stem cell					1		1
獸醫					1		1

## Sheet: 工作表2
Taipei Medical University & Hospital包含Shuang Ho Hosp,Wan Fang Hosp
IF
<1	1
1=<IF<2	2
2=<IF<3	3
3=<IF<4	4
4=<IF<5	5
5=<IF<6	6
6=<IF<7	7
7=<IF<8	8
8=<IF<9	9
9=<IF<10	10
>=10	11
